# Supplementary material for: Laying the foundation for a Core Set of the International Classification of Functioning, Disability and Health for community-dwelling older adults in primary care: relevant categories of their functioning from the research perspective, a scoping review
Source: PubMed Central journal article supplement — BMJ Open. 2021 Feb 17;11(2):e037333. doi: 10.1136/bmjopen-2020-037333 (PMC7893647; doi:10.1136/bmjopen-2020-037333), 2021-02-17
Supplement: bmjopen-2020-037333.draft_revisions.pdf [file bmjopen-2020-037333.draft_revisions.pdf]

# BMJ Open

BMJ Open is committed to open peer review. As part of this commitment we make the peer review history of every article we publish publicly available.

When an article is published we post the peer reviewers' comments and the authors' responses online. We also post the versions of the paper that were used during peer review. These are the versions that the peer review comments apply to.

The versions of the paper that follow are the versions that were submitted during the peer review process. They are not the versions of record or the final published versions. They should not be cited or distributed as the published version of this manuscript.

BMJ Open is an open access journal and the full, final, typeset and author-corrected version of record of the manuscript is available on our site with no access controls, subscription charges or pay-per-view fees (<http://bmjopen.bmj.com>).

If you have any questions on BMJ Open's open peer review process please email [info.bmjopen@bmj.com](mailto:info.bmjopen@bmj.com)

# BMJ Open

## Laying the foundation for an ICF core set for community-dwelling elderly adults in primary care: the research perspective identified by a review of the literature

|                               |                                                                                                                                                                                                                                                                                                                                                                                                                                                                                                                                                                                                                                                                                                                                                                                                                                                                                                                                                                                                                                                      |
|-------------------------------|------------------------------------------------------------------------------------------------------------------------------------------------------------------------------------------------------------------------------------------------------------------------------------------------------------------------------------------------------------------------------------------------------------------------------------------------------------------------------------------------------------------------------------------------------------------------------------------------------------------------------------------------------------------------------------------------------------------------------------------------------------------------------------------------------------------------------------------------------------------------------------------------------------------------------------------------------------------------------------------------------------------------------------------------------|
| Journal:                      | <i>BMJ Open</i>                                                                                                                                                                                                                                                                                                                                                                                                                                                                                                                                                                                                                                                                                                                                                                                                                                                                                                                                                                                                                                      |
| Manuscript ID                 | bmjopen-2020-037333                                                                                                                                                                                                                                                                                                                                                                                                                                                                                                                                                                                                                                                                                                                                                                                                                                                                                                                                                                                                                                  |
| Article Type:                 | Original research                                                                                                                                                                                                                                                                                                                                                                                                                                                                                                                                                                                                                                                                                                                                                                                                                                                                                                                                                                                                                                    |
| Date Submitted by the Author: | 29-Jan-2020                                                                                                                                                                                                                                                                                                                                                                                                                                                                                                                                                                                                                                                                                                                                                                                                                                                                                                                                                                                                                                          |
| Complete List of Authors:     | Tomandl, Johanna; Friedrich-Alexander University Erlangen-Nuremberg, Institute of General Practice<br>Heinmüller, Stefan; Friedrich-Alexander University Erlangen-Nuremberg, Institute of General Practice<br>Selb, Melissa; ICF Research Branch, Swiss Paraplegic Research<br>Graessel, Elmar; Friedrich-Alexander University Erlangen-Nuremberg, Center for Health Services Research in Medicine, Department of Psychiatry and Psychotherapy<br>Freiberger, Ellen; Friedrich-Alexander University Erlangen-Nuremberg, Institute for Biomedicine of Aging<br>Kühlein, Thomas ; Friedrich-Alexander University Erlangen-Nuremberg, Institute of General Practice<br>Hueber, Susann; Friedrich-Alexander University Erlangen-Nuremberg, Institute of General Practice<br>Book, Stephanie; Friedrich-Alexander University Erlangen-Nuremberg, Center for Health Services Research in Medicine, Department of Psychiatry and Psychotherapy<br>Gotthardt, Susann; Friedrich-Alexander University Erlangen-Nuremberg, Institute for Biomedicine of Ageing |
| Keywords:                     | GENERAL MEDICINE (see Internal Medicine), GERIATRIC MEDICINE, PRIMARY CARE                                                                                                                                                                                                                                                                                                                                                                                                                                                                                                                                                                                                                                                                                                                                                                                                                                                                                                                                                                           |
|                               |                                                                                                                                                                                                                                                                                                                                                                                                                                                                                                                                                                                                                                                                                                                                                                                                                                                                                                                                                                                                                                                      |

SCHOLARONE™  
Manuscripts

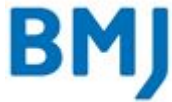

I, the Submitting Author has the right to grant and does grant on behalf of all authors of the Work (as defined in the below author licence), an exclusive licence and/or a non-exclusive licence for contributions from authors who are: i) UK Crown employees; ii) where BMJ has agreed a CC-BY licence shall apply, and/or iii) in accordance with the terms applicable for US Federal Government officers or employees acting as part of their official duties; on a worldwide, perpetual, irrevocable, royalty-free basis to BMJ Publishing Group Ltd ("BMJ") its licensees and where the relevant Journal is co-owned by BMJ to the co-owners of the Journal, to publish the Work in this journal and any other BMJ products and to exploit all rights, as set out in our [licence](#).

The Submitting Author accepts and understands that any supply made under these terms is made by BMJ to the Submitting Author unless you are acting as an employee on behalf of your employer or a postgraduate student of an affiliated institution which is paying any applicable article publishing charge ("APC") for Open Access articles. Where the Submitting Author wishes to make the Work available on an Open Access basis (and intends to pay the relevant APC), the terms of reuse of such Open Access shall be governed by a Creative Commons licence – details of these licences and which [Creative Commons](#) licence will apply to this Work are set out in our licence referred to above.

Other than as permitted in any relevant BMJ Author's Self Archiving Policies, I confirm this Work has not been accepted for publication elsewhere, is not being considered for publication elsewhere and does not duplicate material already published. I confirm all authors consent to publication of this Work and authorise the granting of this licence.

1  
2  
3 **Laying the foundation for an ICF core set for community-dwelling elderly adults in**  
4 **primary care: the research perspective identified by a review of the literature**  
5  
6

7  
8 Johanna Tomandl (0000-0001-5571-421X)<sup>a</sup>  
9

10 Stefan Heinmüller (0000-0002-7997-7871)<sup>a</sup>  
11

12 Melissa Selb<sup>b</sup>  
13

14 Elmar Graessel<sup>c</sup>  
15

16 Ellen Freiberger<sup>d</sup>  
17

18 Thomas Kuehlein<sup>a</sup>  
19

20 Susann Hueber<sup>a</sup>  
21

22 Stephanie Book(0000-0002-7120-4022)<sup>c\*</sup>  
23

24 Susann Gotthardt<sup>d\*</sup>  
25

26  
27 \* SB and SG contributed equally to this work.  
28  
29

30  
31 <sup>a</sup> Friedrich-Alexander-Universität Erlangen-Nürnberg (FAU), Institute of General Practice,  
32 Universitätsstraße 29, 91054 Erlangen, Germany  
33

34 <sup>b</sup> ICF Research Branch, a cooperation partner within the WHO Collaborating Center for the  
35 Family of International Classifications in Germany (at DIMDI), Nottwil, Switzerland / Swiss  
36 Paraplegic Research, Nottwil, Switzerland  
37

38 <sup>c</sup> Center for Health Services Research in Medicine, Department of Psychiatry and  
39 Psychotherapy, Friedrich-Alexander-Universität Erlangen-Nürnberg (FAU), Schwabachanlage  
40 10, 91054 Erlangen, Germany  
41

42 <sup>d</sup> Friedrich-Alexander-Universität Erlangen-Nürnberg (FAU), Institute for Biomedicine of Aging,  
43 Kobergerstraße 60, 90408 Nuremberg, Germany  
44

45 **Corresponding Author:**

46 Johanna Tomandl  
47 Friedrich-Alexander-Universität Erlangen-Nürnberg (FAU)  
48 Institute of General Practice  
49 Universitätsstraße 29, 91054 Erlangen, Germany  
50 E-Mail: [johanna.tomandl@gmail.com](mailto:johanna.tomandl@gmail.com)  
51 Tel.: 004991318545761  
52

53 **Word count:** 3.809  
54  
55

56  
57  
58 **Abstract**  
59  
60

1  
2  
3 **Objectives:** Overmedicalization grows with ageing. Concentrating on functioning might help  
4  
5 to discriminate between necessary and unnecessary medicine. The International Classification  
6  
7 of Functioning, Disability and Health (ICF) is a tool for describing functioning. Being too  
8  
9 detailed, the aim is to develop a Core Set for geriatric patients in primary care. The objective  
10  
11 of this study was to find relevant concepts of functioning within the scientific literature.  
12  
13

14 **Design:** A systematic literature review was conducted. Articles dealing with functioning in the  
15  
16 elderly were searched and assessed for eligibility. Relevant concepts were extracted and  
17  
18 linked to the ICF following established linking rules. Finally, a frequency analysis was  
19  
20 conducted.  
21  
22

23 **Setting:** Home, primary care.  
24  
25

26 **Participants:** Community-dwelling adults aged 75 and older.  
27  
28

29 **Results:** From 5,060 identified publications 82 were included. Overall 1,182 concepts were  
30  
31 retrieved. Most were linked to the 'activities and participation' component. The most frequently  
32  
33 identified categories were '*memory functions*', '*dressing*', and '*changing basic body position*'.  
34  
35

36 **Conclusions:** This review provides a list of relevant ICF categories from the research  
37  
38 perspective that will be used for developing the ICF Core Set for older primary care patients.  
39  
40

41 **Trial registration number:** The study is registered in PROSPERO (CRD42017067784),  
42  
43 *Versorgungsforschung Deutschland Datenbank* [VfD\_17\_003833] and *clinicaltrials.gov*  
44  
45 [NCT03384732].  
46  
47

48 **Keywords:** International Classification of Functioning, Disability and Health, community-  
49  
50 dwelling older persons, geriatric health services, general practice  
51  
52  
53  
54  
55  
56  
57

## 58 **1 Article Summary**

59  
60

## 1.1 Strengths and limitations

- A broad literature search was performed in five key medical and social databases.
- This review encompasses a broad spectrum of studies, going beyond the conventional randomized controlled trials and clinical trials and including observational and qualitative studies.
- The researchers involved in this study are from different disciplines, allowing for an interdisciplinary perspective on the topic.
- Restricting the search to articles published in English or German in specific high-resources countries and drawing a random sample for full text screening carries the risk of losing potentially relevant publications.
- Excluding studies that focus solely on body structures may have introduced some bias in the results.

## 2 Introduction

The ever increasing life expectancy is accompanied by an increasing prevalence of chronic diseases(1, 2). Thus, older patients are often affected by multimorbidity and as a consequence also polypharmacy, which is defined as the concurrent use of multiple medicines(3, 4). Inappropriate polypharmacy, especially in old age, can lead to negative outcomes such as adverse drug events, increased risk for fractures, hospitalization, and even death(5, 6). Considering these negative outcomes, the question arises if it is reasonable to initiate a certain treatment to prevent a patient from having one disease even when this treatment may increase the patient's risk of dying from another disease. In 1986, Jamouille initially proposed the concept of quaternary prevention(7), which is defined as an "action taken to identify patient at risk of overmedicalization, to protect him from new medical invasion, and to suggest him interventions ethically acceptable"(8). Providing too much medicine is both an ethical and an economical problem(9). Moreover, the phenomenon called "disease mongering", i.e. the commercialization of disease, which turns healthy people into patients, is increasingly becoming a problem(10, 11). In addressing these issues, general practitioners play a crucial

1  
2  
3 role. In Germany they are the primary contact for the ambulatory care of older patients. There  
4  
5 is some evidence that with increasing age the potential of chronic conditions to predict mortality  
6  
7 decreases, while functioning limitations seem to become stronger predictors(12). Functioning  
8  
9 limitations are not only a predictor of mortality, but also provide important information about  
10  
11 the severity and consequences of chronic conditions(13). Thus, functioning information  
12  
13 together with disease information might be a better indicator of necessary and unnecessary  
14  
15 medicine in older persons than disease information alone. The term *functioning* can be defined  
16  
17 as a person's intrinsic health capacity, as well as what the person actually does or is not able  
18  
19 to do in everyday life in light of the interaction between this health capacity and environmental  
20  
21 factors(14-16). Functioning can be described using the International Classification of  
22  
23 Functioning, Disability and Health (ICF). Launched by World Health Organization (WHO) in  
24  
25 2001, the ICF is an internationally recognized reference framework for health and health-  
26  
27 related states from a bio-psycho-social perspective(17). Functioning can be documented with  
28  
29 ICF domains and categories that are structured hierarchically at different levels within the  
30  
31 components of 'body functions' (b), 'body structures' (s), 'activities and participation' (d),  
32  
33 'environmental factors' (e) and 'personal factors' (not classified) using an alphanumeric coding  
34  
35 system. With more than 1,400 categories, the ICF is, however, too extensive to be used in  
36  
37 daily practice. To address this issue, shorter lists of categories, so-called ICF Core Sets (ICF-  
38  
39 CS), have been developed for several health conditions.<sup>1</sup> These ICF-CSs comprise categories  
40  
41 that cover the typical spectrum of functioning aspects relevant to persons living with the given  
42  
43 condition(18). ICF-CS for primary care and for geriatric patients have already been  
44  
45 developed(19-21). However, none of these were developed according to the standardized  
46  
47 process for developing ICF-CS(18). For this reason, we aimed to develop an ICF-CS, covering  
48  
49 the life and functioning of geriatric patients aged 75 years and older in primary care, following  
50  
51 the standardized process. This process includes a preparatory phase followed by an  
52  
53 international ICF consensus conference and the implementation of the first version of the ICF-  
54  
55 CS. During the preparatory phase, four studies are conducted to identify relevant ICF  
56  
57 CS. During the preparatory phase, four studies are conducted to identify relevant ICF  
58  
59 categories from four different perspectives: a systematic literature review (research  
60

1  
2  
3 perspective), a qualitative study (perspective of the target population)(22), an expert survey  
4 (experts' perspective), and an empirical study (clinical perspective)(23). It is important to  
5 capture these different perspectives in the development process in order to gain a holistic  
6 understanding of the functioning of people living with a specific health condition.  
7  
8  
9  
10

11  
12 In this paper, the methods and the results of the systematic literature review of the project to  
13 develop ICF-CS for older persons in primary care are presented. The aims were (a) to identify  
14 concepts contained in instruments for assessing functioning of older persons ( $\geq 75$  years) that  
15 are frequently used in published studies and (b) to link these concepts to the ICF.  
16  
17  
18  
19  
20

### 21 **3 Methods**

22  
23 This systematic literature review was conducted following the methodology proposed by the  
24 ICF Research Branch(18).<sup>2</sup> This methodology is composed of five steps: 1) literature search,  
25 2) study selection, 3) extraction of relevant concepts, 4) linkage of the concepts to the ICF and  
26 5) frequency analysis. In contrast to other systematic reviews, we did not aim to answer clinical  
27 questions by reviewing existing evidence, but to systematically extract the concepts used by  
28 the scientific community to operationalize functioning. A study protocol has recently been  
29 published elsewhere(24). This review was registered in PROSPERO (CRD42017067784) on  
30 07/10/2017 and is reported according to the Preferred Reporting Items for Systematic Reviews  
31 and Meta-Analyses (PRISMA) guidelines(25).  
32  
33  
34  
35  
36  
37  
38  
39  
40  
41  
42  
43

#### 44 **3.1 Eligibility Criteria**

45  
46 The selection of the eligibility criteria was guided by the PICOS (Population, Intervention,  
47 Comparison, Outcomes, Study design) framework(26). Due to the special focus of this review,  
48 only the 'P', 'O', and 'S' were relevant for our search.  
49  
50

51  
52 Population: For a publication to be included in this review, all the participants included in the  
53 published study had to be community-dwelling and at least 75 years old. Studies that included  
54 institutionalized participants (e.g. nursing home), participants recruited in a hospital or  
55 rehabilitation center, or participants with dementia were excluded. As the intended ICF-CS is  
56 meant to be used in primary care practices in Germany, only studies conducted in high-  
57  
58  
59  
60



1  
2  
3 resource countries with a similar socio-economic and cultural background were considered.  
4  
5 Consequently, only studies conducted in the member states of the European Union and the  
6  
7 European Free Trade Association, the United States, Australia and New Zealand were  
8  
9 included. Moreover, to get a representative picture of the health reality of old adults, studies  
10  
11 with participants suffering from only one specific health condition were excluded.  
12

13  
14 Outcomes: The publications had to be related to functioning as defined by the ICF (e.g.  
15  
16 activities of daily living, social interaction, physical mobility). Publications reporting on studies  
17  
18 that solely focused on body structures without considering any other features of functioning  
19  
20 were excluded to ensure that the resulting candidate categories reflect the integrative  
21  
22 biopsychosocial nature of functioning.  
23

24  
25 Study design: As suggested in the ICF-CS development guidelines, randomized controlled  
26  
27 trials, clinical controlled trials, cross-sectional studies, observational studies and qualitative  
28  
29 studies were included(18). Study protocols, case studies, economic evaluation studies,  
30  
31 conference papers, psychometric studies, prevention studies, studies of phase-II clinical trials,  
32  
33 studies exclusively showing laboratory parameters, animal experiments, letters, comments  
34  
35 and editorials were excluded, as those publications usually do not include relevant information  
36  
37 on functioning(18). Furthermore, systematic reviews and meta-analyses were not included in  
38  
39 this review.  
40

### 41 **3.2 Literature search**

42  
43 Electronic searches were carried out in PubMed, PsycINFO, EMBASE, CINAHL und Scopus  
44  
45 to identify potentially relevant publications. The search terms were organized into population  
46  
47 (e.g. aged, elderly, older adults), living condition (e.g. community-dwelling, independently  
48  
49 living) and outcome variables according to the ICF-related terms (e.g. social life, self-care,  
50  
51 home environment) using the thesaurus of the respective database (e.g. Medical subject  
52  
53 headings in PubMed) as well as free text words. Only studies published between 2007 and  
54  
55 2017 in peer-reviewed journals in English or German were considered for inclusion. The search  
56  
57 strategy was reviewed by an experienced librarian. The whole search strategy is available at  
58  
59 PROSPERO(27).  
60

### 3.3 Study selection

The publications found in the databases were exported to a review manager (Covidence). After having removed duplicates, five researchers (JT/SH/SG/SB/EF) performed a title and abstract screening based on the predefined eligibility criteria. Title and abstract of each publication were screened by two researchers independently. As an overwhelming number of publications were identified for the full text screening, a random sample was drawn to ensure manageability. As the purpose of this review was not to answer clinical questions by evaluating existing evidence, but only to systematically identify relevant concepts of functioning, drawing a random sample was possible. This procedure has already been applied in previous ICF-CS development projects(28-31) and is also recommended in the guidelines(18). It was decided that a random sample, containing 50% of all publications, should be included for full text screening. The random sample was drawn using the Random Integer Set Generator(32). The full texts were screened pairwise by four independent researchers (JT/SH/SG/SB) based on the predefined inclusion and exclusion criteria. Results were compared and any disagreement was solved in discussion with all four researchers.

### 3.4 Assessment of study quality

As the purpose of this review was not to assess the effectiveness of certain interventions, but only to systematically identify relevant concepts of functioning, a quality assessment of the studies was considered unnecessary. Nevertheless, only studies that were published in peer-reviewed scientific journals were included for analysis. Thus, the publications have assumingly undergone a level of quality control.

### 3.5 Data extraction

Following the PICOS scheme, the following data were extracted from the publications:

- Population: age, gender, sample size, type of sample
- Intervention (if applicable)
- Control (if applicable)
- Outcomes: concepts identified in the article text; instruments for assessing functioning

### - Study design

Other data extracted were author, title, year and country. "A concept was defined as a single health aspect or a personal (internal) or environmental (external) factor with an impact on health. Formally, a concept could consist of a single word or a set of words"(33). Examples for concepts are living arrangements, social embeddedness or walking. Assessment instruments were defined as any kind of standardized outcome measure (e.g. questionnaires, clinical tests) used in the study. The extraction process led to two different data sets: 1) assessment instruments and 2) concepts extracted from the article text. The first data set is more objective as the assessment instruments provide a standardized and systematic basis for further analysis, whereas the second data set is more subjective. Because of this and based on the methodology applied in other ICF-CS development projects, it was decided to focus only on the first data set(34-37). Disagreement between the two researchers regarding the extracted data was solved by discussion. When consensus between the two could not be reached, a third researcher was consulted.

### **3.6 Data synthesis**

Assessment instruments that were not available in the respective publication were accessed either through the internet or by contacting the authors of the included publications. Following the method of other ICF-CS development projects, only assessment instruments used in at least two different studies were considered(38, 39). The items and response options of each assessment instrument were listed on one table. Subsequently, meaningful concepts contained within each item or response option were extracted. The concepts were linked to ICF categories by two independent researchers using established linking rules(40). When consensus between the two researchers was not reached, a third researcher was consulted. If an ICF category was assigned repeatedly in an assessment instrument, it was counted only once. However, when a publication reported on a study that used multiple instruments and a specific category was identified in more than one of these instruments, this particular category was counted according to the number of instruments to which it was linked. Therefore, the

1  
2  
3 maximum count of one category can exceed the number of identified studies included in the  
4 review. We used descriptive statistics to report the most frequently identified ICF categories.  
5  
6 Only first-level and second-level ICF categories are reported in this paper.<sup>3</sup> If a concept was  
7  
8 linked to a third- or fourth-level ICF category, the overarching second-level category was  
9  
10 included for analysis. Due to the hierarchical nature of the ICF, a lower-level category shares  
11  
12 the attributes of the higher-level category of which it is a member(17).  
13  
14

### 15 16 **3.7 Patient and public involvement**

17  
18 Patients and the public were not involved in this study.  
19

## 20 21 **4 Results**

### 22 23 **4.1 Study Selection**

24  
25 A total of 10,043 publications were identified. After removing duplicates, 5,060 potentially  
26  
27 relevant publications were left. In the abstract screening 681 articles were identified for full-text  
28  
29 screening. Of these, a random sample of 341 articles (50%) was drawn for the full text  
30  
31 screening, from which 82 articles were subsequently included for data extraction (see figure  
32  
33 1). The references of the included studies are available in Appendix A, the study characteristics  
34  
35 in Appendix B.  
36  
37

38  
39  
40 **Please insert figure 1 here**  
41

### 42 43 **4.2 Study characteristics**

44  
45 The 82 publications included studies that were conducted in 17 different countries. About 20%  
46  
47 of the studies were conducted in Finland (n = 16), 14.6% in Sweden (n = 12) and 12.2% in the  
48  
49 United States (n = 10). The investigated study population consisted of 74,351 community-  
50  
51 dwelling elderly, of whom 68.6% were female. Three publications did not provide information  
52  
53 about the gender of their participants. Most of the studies (65.9%) had an observational design  
54  
55 (longitudinal or cross sectional), 15.6% were qualitative studies, 12.2% intervention studies,  
56  
57 4.9% analyzed secondary data and one study (1.2%) used mixed methods.  
58  
59

### 60 **4.3 Linking Results**

From the 82 included publications 111 assessment instruments were identified. Out of these, 30 were identified in at least two of the publications and were included for data extraction (table 1).

Table 1

*Frequency of use and thematic focus of the included assessment instruments.*

| Assessment instrument                                                        | Nr. of studies | Cognition | Mobility | Functioning status | Environmental factors | Health conditions |
|------------------------------------------------------------------------------|----------------|-----------|----------|--------------------|-----------------------|-------------------|
| Mini Mental State Examination (MMSE)                                         | 24             | x         |          |                    |                       |                   |
| Lawton Instrumental Activities of Daily Living Scale                         | 15             |           |          | x                  |                       |                   |
| Katz Index of Independence in Activities of Daily Living                     | 14             |           |          | x                  |                       |                   |
| Geriatric Depression Scale - 15 items                                        | 11             |           |          |                    |                       | x                 |
| Short Physical Performance Battery                                           | 7              |           | x        |                    |                       |                   |
| Activities of Daily Living staircase                                         | 7              |           |          | x                  |                       |                   |
| Timed up and go                                                              | 6              |           | x        |                    |                       |                   |
| Short Form Health 36                                                         | 6              |           |          | x                  |                       |                   |
| Geriatric Depression Scale - 30 items                                        | 5              |           |          |                    |                       | x                 |
| Barthel Index of Activities of Daily Living                                  | 4              |           |          | x                  |                       |                   |
| The University of Alabama at Birmingham Study of Aging Life-Space Assessment | 4              |           |          |                    | x                     |                   |
| Berg Balance Scale                                                           | 4              |           | x        |                    |                       |                   |
| Center for Epidemiologic Studies Depression Scale                            | 4              |           |          |                    |                       | x                 |
| EuroQoL-5 dimension                                                          | 3              |           |          | x                  |                       |                   |
| Groningen Activity Restrictions Scale                                        | 3              |           |          | x                  |                       |                   |
| Abbreviated Mental Test Score                                                | 3              | x         |          |                    |                       |                   |
| Minimum Data Set - Home Care                                                 | 3              | x         | x        | x                  | x                     | x                 |

|                                                      |   |   |   |   |   |
|------------------------------------------------------|---|---|---|---|---|
| Mobility-Tiredness-Scale                             | 3 |   |   |   |   |
| Perceived environmental barriers to outdoor mobility | 2 |   |   | x |   |
| Cognitive Performance Scale                          | 2 | x |   |   |   |
| Functional Independence Measure                      | 2 |   | x | x | x |
| Gait Speed                                           | 2 |   | x |   |   |
| Gijón Social Scale                                   | 2 |   |   |   | x |
| Housing Enabler Screening Tool                       | 2 |   |   |   | x |
| Housing Options for Older People                     | 2 |   |   |   | x |
| Impact on Participation and Autonomy Questionnaire   | 2 |   | x | x | x |
| Instrumental Activity Measure                        | 2 |   |   | x |   |
| Mini Nutritional Assessment                          | 2 |   | x | x | x |
| Neuropsychological Aging Inventory                   | 2 |   |   | x | x |
| Usability in my Home Questionnaire                   | 2 |   |   |   | x |

The most frequently used assessment instrument was the Mini Mental State Examination (MMSE), which was reported in 24 articles (29.3%). From the selected assessment instruments 1,182 concepts were extracted. Out of these, 24 concepts were linked to first-level ICF categories, 1,066 to second-level categories and 48 multidimensional concepts to two or more ICF categories. Forty-four concepts could not be assigned to a specific ICF category.

The 1,066 concepts were assigned to 87 different second-level ICF categories (see table 2). Of these, 41 (47.1%) are related to 'activities and participation', 24 (27.6%) categories refer to 'body functions', 20 (23.0%) to 'environmental factors' and two (2.3%) belong to 'body structures'. Mentioned 53 times, the category *memory functions (b144)* was the most frequently identified category. Within the 'activities and participation' component, the category *dressings (d540)* and within the 'environmental factors' component, *products or substances for personal consumption (e110)* were identified most often. The two extracted ICF categories for

'body structures' were *structure of upper extremity (s730)* and *structure of lower extremity (s750)*. All 87 ICF categories will serve as candidates for considering during the consensus conference to decide on the ICF-CS for older persons in primary care.

Table 2

*Frequency of second-level ICF categories linked to concepts identified in the assessment instruments.*

| ICF code                            | ICF category                                    | Count |
|-------------------------------------|-------------------------------------------------|-------|
| <b>Activities and participation</b> |                                                 |       |
| d177                                | Making decisions                                | 9     |
| d166                                | Reading                                         | 2     |
| d170                                | Writing                                         | 2     |
| d210                                | Undertaking a single task                       | 28    |
| d230                                | Carrying out daily routine                      | 9     |
| d240                                | Handling stress and other psychological demands | 7     |
| d360                                | Using communication devices and techniques      | 17    |
| d410                                | Changing basic body position                    | 39    |
| d450                                | Walking                                         | 36    |
| d470                                | Using transportation                            | 25    |
| d455                                | Moving around                                   | 24    |
| d460                                | Moving around in different locations            | 21    |
| d475                                | Driving                                         | 17    |
| d420                                | Transferring oneself                            | 15    |
| d430                                | Lifting and carrying objects                    | 8     |
| d445                                | Hand and arm use                                | 5     |
| d415                                | Maintaining a body position                     | 3     |
| d465                                | Moving around using equipment                   | 2     |
| d540                                | Dressing                                        | 41    |
| d510                                | Washing oneself                                 | 39    |
| d550                                | Eating                                          | 36    |
| d530                                | Toileting                                       | 30    |
| d520                                | Caring for body parts                           | 13    |
| d560                                | Drinking                                        | 11    |
| d570                                | Looking after one's health                      | 5     |
| d640                                | Doing housework                                 | 37    |

1  
2  
3  
4  
5  
6  
7  
8  
9  
10  
11  
12  
13  
14  
15  
16  
17  
18  
19  
20  
21  
22  
23  
24  
25  
26  
27  
28  
29  
30  
31  
32  
33  
34  
35  
36  
37  
38  
39  
40  
41  
42  
43  
44  
45  
46  
47  
48  
49  
50  
51  
52  
53  
54  
55  
56  
57  
58  
59  
60

|                       |                                        |    |
|-----------------------|----------------------------------------|----|
| d630                  | Preparing meals                        | 28 |
| d620                  | Acquisition of goods and service       | 28 |
| d650                  | Caring for household objects           | 6  |
| d660                  | Assisting others                       | 2  |
| d750                  | Informal social relationships          | 4  |
| d710                  | Basic interpersonal interactions       | 2  |
| d720                  | Complex interpersonal interactions     | 2  |
| d760                  | Family relationships                   | 2  |
| d770                  | Intimate relationships                 | 2  |
| d870                  | Economic self-sufficiency              | 17 |
| d850                  | Remunerative employment                | 7  |
| d860                  | Basic economic transactions            | 2  |
| d920                  | Recreation and leisure                 | 19 |
| d910                  | Community life                         | 5  |
| d930                  | Religion and spirituality              | 5  |
| <b>Body functions</b> |                                        |    |
| b144                  | Memory functions                       | 53 |
| b114                  | Orientation functions                  | 35 |
| b140                  | Attention functions                    | 35 |
| b152                  | Emotional functions                    | 35 |
| b167                  | Mental functions of language           | 30 |
| b130                  | Energy and drive functions             | 28 |
| b126                  | Temperament and personality functions  | 23 |
| b110                  | Consciousness functions                | 5  |
| b134                  | Sleep functions                        | 5  |
| b160                  | Thought functions                      | 5  |
| b147                  | Psychomotor functions                  | 3  |
| b172                  | Calculation functions                  | 3  |
| b280                  | Sensation of pain                      | 12 |
| b210                  | Seeing functions                       | 3  |
| b230                  | Hearing functions                      | 3  |
| b330                  | Fluency and rhythm of speech functions | 5  |
| b525                  | Defecation functions                   | 19 |
| b510                  | Ingestion functions                    | 3  |



|    |      |                                                                                        |    |
|----|------|----------------------------------------------------------------------------------------|----|
| 1  |      |                                                                                        |    |
| 2  |      |                                                                                        |    |
| 3  | b530 | Weight maintenance functions                                                           | 3  |
| 4  |      |                                                                                        |    |
| 5  | b620 | Urination functions                                                                    | 25 |
| 6  |      |                                                                                        |    |
| 7  | b755 | Involuntary movement reaction functions                                                | 13 |
| 8  |      |                                                                                        |    |
| 9  | b730 | Muscle power functions                                                                 | 7  |
| 10 |      |                                                                                        |    |
| 11 | b810 | Protective functions of the skin                                                       | 3  |
| 12 | b820 | Repair functions of the skin                                                           | 3  |
| 13 |      |                                                                                        |    |
| 14 |      | <b>Body structures</b>                                                                 |    |
| 15 | s750 | Structure of lower extremity                                                           | 2  |
| 16 |      |                                                                                        |    |
| 17 | s730 | Structure of upper extremity                                                           | 2  |
| 18 |      |                                                                                        |    |
| 19 |      | <b>Environmental factors</b>                                                           |    |
| 20 | e110 | Products or substances for personal consumption                                        | 17 |
| 21 |      |                                                                                        |    |
| 22 | e155 | Design, construction and building products and technology of buildings for private use | 12 |
| 23 |      |                                                                                        |    |
| 24 | e115 | Products and technology for personal use in daily living                               | 5  |
| 25 |      |                                                                                        |    |
| 26 | e120 | Products and technology for personal indoor and outdoor mobility and transportation    | 4  |
| 27 |      |                                                                                        |    |
| 28 | e125 | Products and technology for communication                                              | 2  |
| 29 |      |                                                                                        |    |
| 30 | e160 | Products and technology of land development                                            | 2  |
| 31 |      |                                                                                        |    |
| 32 | e165 | Assets                                                                                 | 2  |
| 33 |      |                                                                                        |    |
| 34 | e210 | Physical geography                                                                     | 2  |
| 35 |      |                                                                                        |    |
| 36 | e225 | Climate                                                                                | 2  |
| 37 |      |                                                                                        |    |
| 38 | e240 | Light                                                                                  | 2  |
| 39 |      |                                                                                        |    |
| 40 | e250 | Sound                                                                                  | 2  |
| 41 |      |                                                                                        |    |
| 42 | e310 | Immediate family                                                                       | 5  |
| 43 |      |                                                                                        |    |
| 44 | e315 | Extended family                                                                        | 5  |
| 45 |      |                                                                                        |    |
| 46 | e320 | Friends                                                                                | 5  |
| 47 |      |                                                                                        |    |
| 48 | e325 | Acquaintances, peers colleagues, neighbors and community members                       | 5  |
| 49 |      |                                                                                        |    |
| 50 | e355 | Health professionals                                                                   | 3  |
| 51 |      |                                                                                        |    |
| 52 | e575 | General social support services, systems and policies                                  | 5  |
| 53 |      |                                                                                        |    |
| 54 | e580 | Health services, systems and policies                                                  | 5  |
| 55 |      |                                                                                        |    |
| 56 | e530 | Utilities services, systems and policies                                               | 4  |
| 57 |      |                                                                                        |    |
| 58 | e520 | Open space planning services, systems and policies                                     | 2  |
| 59 |      |                                                                                        |    |
| 60 |      |                                                                                        |    |

---

*Note.* d: activities and participation, b: body functions, s: body structures, e: environmental factors

The assigned first-level categories can be seen in table 3. Forty-eight extracted concepts were not linkable to only one ICF category. For these concepts, two or more categories were chosen for each concept (table 4).

Table 3

*Frequency of first-level ICF categories linked to concepts identified in the assessment instruments.*

| ICF Codes | ICF category                                 | Count |
|-----------|----------------------------------------------|-------|
| e3        | Support and relationships                    | 9     |
| d7        | Interpersonal interactions and relationships | 5     |
| d3        | Communication                                | 2     |
| d4        | Mobility                                     | 2     |
| d5        | Self-care                                    | 2     |
| d6        | Domestic life                                | 2     |
| d8        | Major life areas                             | 2     |

*Note.* e: environmental factors, d: activities & participation

Table 4

*Frequency of combinations of ICF categories linked to concepts identified in the assessment instruments.*

| ICF codes          | Description                                 | Count |
|--------------------|---------------------------------------------|-------|
| b152, b1266        | Feeling worthless                           | 18    |
| b130, b1264        | Openness for new experiences                | 18    |
| b1470, d720, b1521 | Changes in behavior symptoms                | 3     |
| b152, b130         | Indicators of depression, anxiety, sad mood | 3     |
| b1641, d230, d177  | Cognitive skills for daily decision-making  | 3     |
| b755, b2402, b152  | Fear of falling                             | 3     |

*Note.* b: body functions, d: activities & participation

Out of the 44 concepts, which could not be assigned to a specific ICF category, 30 (68.2%) were characterized as 'not definable' (nd), implying that the concept belonged to the universe of the ICF, but a decision about the most precise ICF category could not be made(40). Nine (20.5%) concepts referred to 'personal factors' (pf) and five (11.4%) were 'health conditions' (coded as 'not covered-health condition', nc-hc). The 'nd' concepts mainly included general health, physical health, physical activity, and activities of daily living. Concepts linked to

1  
2  
3 'personal factors' included living arrangements, self-sufficiency and medication adherence.<sup>4</sup>  
4  
5 The commonly reported health conditions according to organ systems were diseases of the  
6  
7 skin and subcutaneous tissue, psychiatric disorders, neurological diseases, infectious  
8  
9 diseases, diseases of the digestive system, sensory disorders, diseases of the  
10  
11 musculoskeletal system, and cancer.  
12  
13

## 14 **5 Discussion**

15  
16  
17 From the research perspective, the component 'activities and participation' has shown to be  
18  
19 the most relevant among all ICF components with regard to functioning of older persons.  
20  
21 Almost half of all assigned categories are in this component. ICF categories that belong to the  
22  
23 components 'body functions' and 'environmental factors', were less frequently assigned. With  
24  
25 only two ICF categories, 'body structures' seems to be the least relevant component of the  
26  
27 four. However, this might be due to the fact that studies which solely focused on body  
28  
29 structures without considering any other features of functioning were excluded. Such studies  
30  
31 were excluded to ensure that the resulting candidate categories reflect the integrative  
32  
33 biopsychosocial nature of functioning.  
34  
35

36  
37 The ICF chapters with the most frequently assigned categories were: b1 'mental functions', d4  
38  
39 'mobility', d5 'self-care', and d6 'domestic life'. These areas are of special interest as they are  
40  
41 prerequisites for being able to live independently at home. In a meta-analysis, indicators of  
42  
43 functional and cognitive impairments were identified as the strongest predictors for  
44  
45 necessitating admission to a nursing home(41). Cognitive impairment has also been identified  
46  
47 as the strongest predictor for necessitating nursing home placement in a study investigating  
48  
49 caregivers reasons for nursing home placement(42). Frequently identified categories referring  
50  
51 to d5 'self-care' were *dressing (d540)*, *washing oneself (d510)*, *eating (d550)*, and *toileting*  
52  
53 *(d530)*. These are all activities of daily living. Literature indicates, that older adults with  
54  
55 problems in three or more activities of daily living had a higher risk of being admitted to a  
56  
57 nursing home than adults without problems(41). Household activities, like *doing housework*  
58  
59 *(d640)* or *preparing meals (d630)*, have frequently been identified in this review, but have not  
60

1  
2  
3 been found to be a major predictor for nursing home placement(41). This might be due to the  
4 fact that impairments in these areas can easily be compensated e.g. with household aids or  
5 assistance from family members.  
6  
7

8  
9 No concepts were identified referring to the chapter b4 'functions of the cardiovascular,  
10 hematological, immunological and respiratory systems'. This might be due to the fact, that  
11 health conditions are coded with 'nc-hc' and not with the ICF category representing the  
12 underlying functions affected by a certain disease. Another explanation might be that, although  
13 the prevalence of diseases in these systems, especially of cardiovascular diseases, has  
14 increased since the 1980s, inability to perform activities of daily living as well as mortality  
15 induced by these diseases has decreased in the same period(2). This might be an explanation  
16 why recent research that focuses on functioning of the elderly, as reflected by the publications  
17 from 2007-2017, is less concerned with functions of the cardiovascular, hematological,  
18 immunological and respiratory systems. Moreover, no concepts were identified in the chapter  
19 e4 'attitudes'. As several studies and systematic reviews provide evidence that negative  
20 attitudes towards old age negatively affect the health of the elderly, attitudes might be a  
21 relevant aspect to be included in instruments assessing functioning(43-45).  
22  
23  
24  
25  
26  
27  
28  
29  
30  
31  
32  
33  
34  
35

36 Concepts referring to environmental factors with an impact on an individual's life were  
37 minimally addressed in the assessment instruments reported in the included articles. The most  
38 frequently identified category in this section was *products or substances for personal*  
39 *consumption (e110)*, mainly assigned for the concept of medication. However, environmental  
40 factors like housing design (e.g. lighting conditions, uneven surfaces), neighborhood planning  
41 (e.g. public transportation, walkable community services), and social support (e.g. family,  
42 friends, or health professionals) play a crucial role in old age. Considering these environmental  
43 factors can contribute to the prevention of falls, nursing home placement as well as to the  
44 compensation of other negative effects of age-related declines(41, 46-48). Thus, developing  
45 instruments that addresses these essential environmental factors or revising current  
46 assessment instruments to include more environmental factors items may be warranted.  
47  
48  
49  
50  
51  
52  
53  
54  
55  
56  
57  
58  
59  
60

## 5.1 Strengths and limitations

1  
2  
3 There are several strengths and limitations of this systematic literature review. A broad  
4 literature review was performed using a systematic search strategy in five key medical and  
5 social databases. One strength is its interdisciplinary nature. The researchers who developed  
6 the search strategy and conducted the study selection, data extraction and linking are from  
7 different disciplines (e.g. psychology, sports science, medicine), allowing for an  
8 interdisciplinary perspective on the topic. Furthermore, this review encompassed a broad  
9 spectrum of studies, going beyond the conventional randomized controlled trials and clinical  
10 trials and including observational and qualitative studies.

11  
12 A limitation of this literature review is the restriction to articles published in English or German  
13 in specific high-resources countries. Thus, relevant studies that were conducted in other  
14 countries or published in other languages were possibly missed. Also drawing a random  
15 sample for full text screening carries the risk of losing potentially relevant publications. Finally,  
16 excluding studies that focus solely on body structures may have introduced some bias in the  
17 results. The reason for excluding these studies was mentioned above.

18  
19 Some potentially relevant information may have been lost in the linking process, as the ICF is  
20 not precise enough to represent some relevant concepts for older adults. For example, fatigue,  
21 falls or fear of falling could not easily be linked to one specific ICF category. Sometimes more  
22 than one category was necessary to be able to describe these concepts; e.g. fear of falling  
23 was linked using *involuntary movement reaction functions (b755)*, *sensation of falling (b2402)*,  
24 and *emotional functions (b152)*. Other concepts could only be linked to the very general first-  
25 level ICF categories, not allowing a detailed representation of the concept; e.g. isolation was  
26 linked to *support and relationships (e3)*. Sometimes, the same concept could be linked to  
27 different categories. This was especially the case for concepts regarding the change of body  
28 positions. For example the concept “get into bed” can be linked to:

- 29  
30  
31  
32  
33  
34  
35  
36  
37  
38  
39  
40  
41  
42  
43  
44  
45  
46  
47  
48  
49  
50  
51  
52  
53  
54  
55  
56  
57  
58  
59  
60
- *lying down (d4100)*; defined as “Getting into and out of a lying down position or changing body position from horizontal to any other position, such as standing up or sitting down”(17) or to

- 1  
2  
3 - *standing (d4104)*; defined as “Getting into and out of a standing position or changing  
4 *body position from standing to any other position, such as lying down or sitting*  
5 *down”(17).*  
6  
7  
8

9 This was one reason why we decided to link all concepts to second-level categories only. Being  
10 aware of these issues, WHO created a mechanism of updating ICF categories to further  
11 enhance the use of this classification(49). We will report the linking problems we faced to WHO  
12 after publication of this study.  
13  
14  
15  
16

## 17 **5.2 Implications for practice**

18 As mentioned above, functioning information together with disease information might be a  
19 better indicator of necessary and unnecessary medicine in older persons than disease  
20 information alone. This systematic literature review provides a list of relevant ICF categories  
21 from the research perspective that will be used, together with the results of the other three  
22 preparatory studies, for developing the ICF-CS for older primary care patients. In the long term,  
23 this ICF-CS is expected to support general practitioners in assessing functioning of their  
24 patients, defining treatment goals, and based on these goals, differentiating between  
25 necessary and unnecessary medical interventions.  
26  
27  
28  
29  
30  
31  
32  
33  
34  
35  
36  
37

## 38 **6 Conclusions**

39 In conclusion, this systematic literature review demonstrates that frequently used instruments  
40 for assessing functioning in older persons focus mainly on activities of daily living and mental  
41 functions, whereas environmental factors are only minimally addressed. Despite some  
42 limitations experienced in the linking process, the ICF provides a useful reference to identify  
43 and cluster the concepts used in instruments for assessing functioning of older adults.  
44  
45  
46  
47  
48  
49  
50  
51

## 52 **7 Acknowledgements**

53 We would like to thank Volker Müller from the university library of the Friedrich-Alexander-  
54 Universität Erlangen Nürnberg for his support and advice in the development of the electronic  
55 search strategy.  
56  
57  
58  
59  
60

1  
2  
3 The present work was performed in partial fulfilment of the requirements for obtaining the  
4 degree 'Dr. rer. biol. hum.' for Johanna Tomandl.  
5  
6  
7

## 8 Footnotes

### 8.1 Contributors

10  
11  
12  
13 JT was involved in the development of the search strategy; performed the literature search;  
14 took part in the screening of the papers, the data extraction and the linking process; performed  
15 the data analysis; was involved in the interpretation of the data; drafted parts of the manuscript  
16 and collated all sections from the co-authors. SHe was involved in the development of the  
17 search strategy, the screening of the papers, the data extraction, the linking process and the  
18 interpretation of the data. MS advised the research team on the ICF Core Set methodology  
19 and revised the draft. EF was involved in the conception of the study, the development of the  
20 search strategy and the abstract screening; provided supervision and revised the draft.  
21 EG/TK/SHu were involved in the conception of the study and in the development of the search  
22 strategy; provided supervision and revised the draft. SB/SG were involved in the development  
23 of the search strategy, the screening of the papers, the data extraction, the linking process and  
24 the interpretation of the data; drafted parts of the manuscript. All authors read and approved  
25 the final version of the manuscript. SB and SG contributed equally to this work.  
26  
27  
28  
29  
30  
31  
32  
33  
34  
35  
36  
37  
38  
39  
40

### 8.2 Funding

41  
42 This work was supported by the German Federal Ministry of Education and Research grant  
43 number 01GY1605.  
44  
45  
46  
47

### 8.3 Disclaimer

48  
49 The funders had no role in the study design, data collection and analysis, decision to publish,  
50 or preparation of the manuscript.  
51  
52  
53  
54

### 8.4 Competing interests

55  
56 None declared.  
57  
58  
59

### 8.5 Patient consent for publication

1  
2  
3 Not required.  
4  
5

## 6 **8.6 Ethics approval**

7

8 Not required.  
9

## 10 **8.7 Data availability statement**

11 The datasets used and analyzed during the current study are available from the corresponding  
12 author upon reasonable request.  
13  
14  
15

## 16 **8.8 Notes**

17  
18  
19  
20 <sup>1</sup> A list of accredited ICF-CS can be found here: <https://www.icf-core-sets.org/en/page1.php>.<sup>2</sup>

21 The ICF Research Branch is a cooperation partner within the WHO collaborating center for  
22 the Family of International Classifications (WHO-FIC) in Germany, which aims to promote  
23 health by implementing ICF based tools and models(50).<sup>3</sup> The categories of the ICF are  
24 divided into different levels. First-level categories are coded using the component letter (b, s,  
25 d, or e) followed by the chapter number (one digit). Second-level categories are coded using  
26 the letter and three digits; the third- and fourth-level categories using the letter and four or  
27 five digits. <sup>4</sup>“Personal factors are contextual factors that relate to the individual such as age,  
28 gender, life experiences and so on” whereas environmental factors “refer to all aspects of the  
29 external or extrinsic world that form the context of an individual’s life and, as such, have an  
30 impact on that person’s functioning” such as human-made physical world, social systems or  
31 laws(17).  
32  
33  
34  
35  
36  
37  
38  
39  
40  
41  
42  
43  
44  
45

## 46 **9 References**

- 47  
48  
49 1. Christensen K, Doblhammer G, Rau R, et al. Ageing populations: the challenges ahead.  
50 *Lancet*. 2009;374(9696):1196-208.10.1016/S0140-6736(09)61460-4.  
51  
52 2. Crimmins EM. Trends in the health of the elderly. *Annu Rev Public Health*. 2004;25:79-98.  
53  
54 3. Johansson T, Abuzahra ME, Keller S, et al. Impact of strategies to reduce polypharmacy  
55 on clinically relevant endpoints: a systematic review and meta-analysis. *Br J Clin*  
56 *Pharmacol*. 2016;82(2):532-48.10.1111/bcp.12959.  
57  
58 4. Masnoon N, Shakib S, Kalisch-Ellett L, et al. What is polypharmacy? A systematic review  
59 of definitions. *BMC Geriatr*. 2017;17(1):230.10.1186/s12877-017-0621-2.  
60



- 1  
2  
3 5. Frazier SC. Health outcomes and polypharmacy in elderly individuals. *J Gerontol Nurs.*  
4 2005;31(9):4-9.  
5
- 6  
7 6. Calderón-Larrañaga A, Poblador-Plou B, González-Rubio F, et al. Multimorbidity,  
8 polypharmacy, referrals, and adverse drug events: are we doing things well? *Br J Gen*  
9 *Pract.* 2012;62(605):e821-e6.10.3399/bjgp12X659295.  
10
- 11  
12 7. Martins C, Godycki-Cwirko M, Heleno B, et al. Quaternary prevention: reviewing the  
13 concept. *Eur J Gen Pract.* 2018;24(1):106-11.10.1080/13814788.2017.1422177.  
14
- 15  
16 8. Wonca international dictionary of general/family practice. Copenhagen2003. Quaternary  
17 Prevention.  
18
- 19  
20 9. Morgan DJ, Brownlee S, Leppin AL, et al. Setting a research agenda for medical overuse.  
21 *BMJ.* 2015;351:h4534.  
22
- 23  
24 10. Moynihan R, Henry D. The fight against disease mongering: generating knowledge for  
25 action. *PLoS Med.* 2006;3(4):e191.10.1371/journal.pmed.0030191.  
26
- 27  
28 11. Kuehlein T, Freund T, Joos S. Von der Kunst des Weglassens. *Dtsch Ärztebl.*  
29 2013;110(48):2312-4.  
30
- 31  
32 12. Lee SJ, Go AS, Lindquist K, et al. Chronic conditions and mortality among the oldest old.  
33 *Am J Public Health.* 2008;98(7):1209-14.10.2105/Ajph.2007.130955.  
34
- 35  
36 13. Chatterji S, Byles J, Cutler D, et al. Health, functioning, and disability in older adults -  
37 present status and future implications. *Lancet.* 2015;385(9967):563-75.  
38
- 39  
40 14. Bostan C, Oberhauser C, Stucki G, et al. Biological health or lived health: which predicts  
41 self-reported general health better? *BMC Public Health.* 2014;14:189.10.1186/1471-2458-  
42 14-189.  
43
- 44  
45 15. Stucki G, Bickenbach J. Functioning: the third health indicator in the health system and  
46 the key indicator for rehabilitation. *Eur J Phys Rehabil Med.* 2017;53(1):134-  
47 8.10.23736/S1973-9087.17.04565-8.  
48
- 49  
50 16. World Health Organization. World report on ageing and health: World Health Organization  
51 2015.  
52
- 53  
54 17. World Health Organization. International Classification of Functioning, Disability and  
55 Health: ICF: World Health Organization 2001.  
56
- 57  
58 18. Selb M, Escorpizo R, Kostanjsek N, et al. A guide on how to develop an International  
59 Classification of Functioning, Disability and Health Core Set. *European Journal of Physical*  
60 *and Rehabilitation Medicine.* 2015;51(1):105-17.

19. Grill E, Hermes R, Swoboda W, et al. ICF Core Set for geriatric patients in early post-acute rehabilitation facilities. *Disabil Rehabil.* 2005;27(7-8):411-416. doi:10.1080/09638280400013966.
20. Spoorenberg SLW, Reijneveld SA, Middel B, et al. The Geriatric ICF Core Set reflecting health-related problems in community-living older adults aged 75 years and older without dementia: development and validation. *Disabil Rehabil.* 2015;37(25):2337-43. doi:10.3109/09638288.2015.1024337.
21. Emmen B, van Boven K, ten Napel H. Exploration of the desired content of an 'International Classification of Functioning' (ICF) item set for multimorbid patients in general practice. *Newsletter WHO-FIC Annual Network Meeting.* 2014;12(1):9-11.
22. Tomandl J, Book S, Hoefle A, et al. Laying the foundation for an ICF core set for community-dwelling elderly adults in primary care: the patient-perspective identified in a qualitative study. Manuscript submitted for publication.
23. Book S, Ulbrecht G, Tomandl J, et al. Laying the foundation for an ICF Core Set for community-dwelling elderly adults in primary care: The clinical perspective identified in a cross-sectional study. Manuscript submitted for publication.
24. Tomandl J, Book S, Gotthardt S, et al. Laying the foundation for a core set of the International Classification of Functioning, Disability and Health for community-dwelling adults aged 75 years and above in general practice: a study protocol. *BMJ Open.* 2018;8(8):e024274. doi:10.1136/bmjopen-2018-024274.
25. Moher D, Liberati A, Tetzlaff J, et al. Preferred reporting items for systematic reviews and meta-analyses: the PRISMA statement. *Ann Intern Med.* 2009;151(4):264-9.
26. Tacconelli E. Systematic reviews: CRD's guidance for undertaking reviews in health care. *The Lancet Infectious Diseases.* 2010;10(4):226.
27. Tomandl J, Heinmueller S, Graessel E, et al. Laying the foundation for an ICF core set for community-dwelling elderly adults in primary care: the research perspective identified by a review of the literature. *PROSPERO* 2017.
28. Geyh S, Cieza A, Schouten J, et al. ICF Core Sets for stroke. *J Rehabil Med.* 2004;36(0):135-41.
29. de Schipper E, Lundequist A, Coghill D, et al. Ability and disability in autism spectrum disorder: A systematic literature review employing the international classification of functioning, disability and health-children and youth version. *Autism Res.* 2015;8(6):782-94.

- 1  
2  
3 30.Granberg S, Dahlström J, Möller C, et al. The ICF core sets for hearing loss—researcher  
4 perspective. Part I: Systematic review of outcome measures identified in audiological  
5 research. *Int J Audio*. 2014;53(2):65-76.  
6  
7  
8 31.Gorostiaga A, Balluerka N, Guilera G, et al. Functioning in patients with schizophrenia: a  
9 systematic review of the literature using the International Classification of Functioning,  
10 Disability and Health (ICF) as a reference. *Qual Life Res*. 2017;26(3):531-43.  
11  
12 32.Random Integer Set Generator 2018. Available from: [https://www.random.org/integer-](https://www.random.org/integer-sets/)  
13 [sets/](https://www.random.org/integer-sets/). (Accessed 20 Dec 2018).  
14  
15  
16 33.Offenbächer M, Cieza A, Brockow T, et al. Are the contents of treatment outcomes in  
17 fibromyalgia trials represented in the international classification of functioning, disability,  
18 and health? *Clin J Pain*. 2007;23(8):691-701.  
19  
20 34.Wolff B, Cieza A, Parentin A, et al. Identifying the concepts contained in outcome  
21 measures of clinical trials on four internal disorders using the International Classification of  
22 Functioning, Disability and Health as a reference. *J Rehabil Med*. 2004(44 Suppl):37-  
23 42.10.1080/16501960410015407.  
24  
25 35.Wasiak J, McMahon M, Danilla S, et al. Measuring common outcome measures and their  
26 concepts using the International Classification of Functioning, Disability and Health (ICF)  
27 in adults with burn injury: a systematic review. *Burns*. 2011;37(6):913-24.  
28  
29 36.Brockow T, Cieza A, Kuhlrow H, et al. Identifying the concepts contained in outcome  
30 measures of clinical trials on musculoskeletal disorders and chronic widespread pain  
31 using the International Classification of Functioning, Disability and Health as a reference.  
32 *J Rehabil Med*. 2004;36(0):30-6.  
33  
34 37.Geyh S, Kurt T, Brockow T, et al. Identifying the concepts contained in outcome  
35 measures of clinical trials on stroke using the International Classification of Functioning,  
36 Disability and Health as a reference. *J Rehabil Med*. 2004;36(0):56-62.  
37  
38 38.Scheuringer M, Grill E, Boldt C, et al. Systematic review of measures and their concepts  
39 used in published studies focusing on rehabilitation in the acute hospital and in early post-  
40 acute rehabilitation facilities. *Disabil Rehabil*. 2005;27(7-8):419-29.  
41  
42 39.Bartoszek G, Fischer U, Müller M, et al. Outcome measures in older persons with  
43 acquired joint contractures: a systematic review and content analysis using the ICF  
44 (International Classification of Functioning, Disability and Health) as a reference. *BMC*  
45 *Geriatr*. 2016;16(1):40.  
46  
47 40.Cieza A, Fayed N, Bickenbach J, et al. Refinements of the ICF Linking Rules to  
48 strengthen their potential for establishing comparability of health information. *Disabil*  
49 *Rehabil*. 2016;41(5):574-83.10.3109/09638288.2016.1145258.  
50  
51  
52  
53  
54  
55  
56  
57  
58  
59  
60

- 1  
2  
3 41. Gaugler JE, Duval S, Anderson KA, et al. Predicting nursing home admission in the US: a  
4 meta-analysis. *BMC Geriatr*. 2007;7(1):13.10.1186/1471-2318-7-13.  
5  
6  
7 42. Buhr GT, Kuchibhatla M, Clipp EC. Caregivers' reasons for nursing home placement:  
8 clues for improving discussions with families prior to the transition. *Gerontologist*.  
9 2006;46(1):52-61.  
10  
11  
12 43. Horton S, Baker J, Pearce G, et al. On the malleability of performance: Implications for  
13 seniors. *J Appl Gerontol*. 2008;27(4):446-65.  
14  
15  
16 44. Meisner BA. A meta-analysis of positive and negative age stereotype priming effects on  
17 behavior among older adults. *Journals of Gerontology Series B: Psychological Sciences*  
18 *and Social Sciences*. 2011;67(1):13-7.  
19  
20  
21 45. Levy BR, Slade MD, Chang ES, et al. Ageism Amplifies Cost and Prevalence of Health  
22 Conditions. *Gerontologist*. 2018:gny131-gny.10.1093/geront/gny131.  
23  
24  
25 46. Lawton MP. Residential environment and self-directedness among older people. *Am*  
26 *Psychol*. 1990;45(5):638.  
27  
28 47. Lien WC, Chang JH, Guo NW, et al. Determinants of perceived physical environment  
29 barriers among community-dwelling elderly in Taiwan. *J Nutr Health Aging*.  
30 2015;19(5):575-82.10.1007/s12603-015-0473-4.  
31  
32  
33 48. Wahl H-W, Iwarsson S, Oswald F. Aging well and the environment: Toward an integrative  
34 model and research agenda for the future. *Gerontologist*. 2012;52(3):306-16.  
35  
36  
37 49. WHO-FIC Update and Revision Committee. ICF Update Platform. User Guide. 2013.  
38  
39 50. ICF Research Branch. Our Mission 2007. Available from: <https://www.icf-research-branch.org/about-us/our-mission>. (Accessed 27 Jan 2020).  
40  
41

## 42 **10 List of abbreviations**

43  
44  
45 ICF: International Classification of Functioning, Disability and Health

46 ICF-CS: International Classification of Functioning, Disability and Health core set

47 PRISMA: Preferred Reporting Items for Systematic Reviews and Meta-Analyses

48 PICOS: Patients, Intervention, Comparison, Outcomes, Study design

## 49 **11 List of figures**

50  
51  
52  
53  
54  
55  
56  
57  
58 *Figure 1.* Preferred Reporting Items for Systematic Reviews and Meta-Analyses (PRISMA)  
59 flow chart.  
60

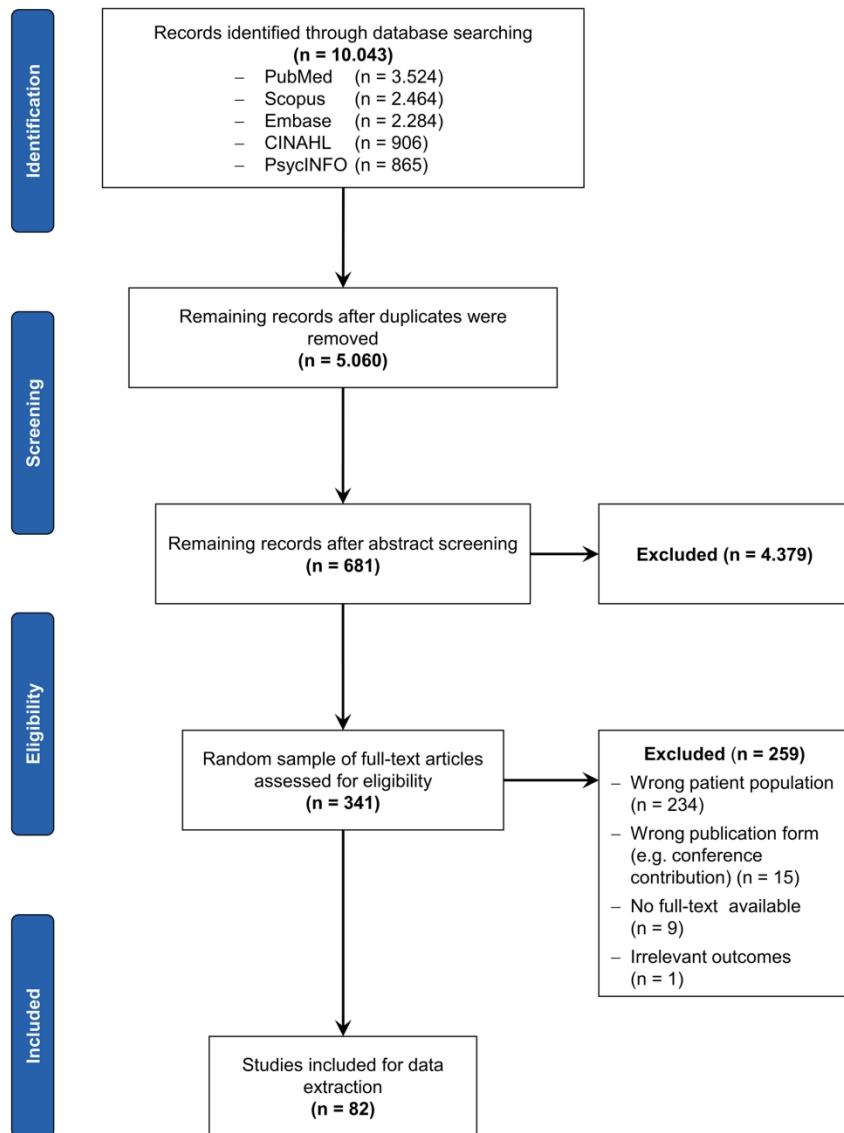

Figure 1. Preferred Reporting Items for Systematic Reviews and Meta-Analyses (PRISMA) flow chart.

169x225mm (300 x 300 DPI)

## Appendix A

### References for included articles

- 1  
2  
3  
4  
5  
6  
7 Aartolahti E, Hakkinen A, Lonroos E, et al. Relationship between functional vision and balance and  
8 mobility performance in community-dwelling older adults. *Aging Clin Exp Res*.  
9 2013;25(5):545-52.10.1007/s40520-013-0120-z.
- 10 Abellan van Kan G, Cesari M, Gillette-Guyonnet S, et al. Sarcopenia and cognitive impairment in  
11 elderly women: results from the EPIDOS cohort. *Age Ageing*. 2013;42(2):196-  
12 202.10.1093/ageing/afs173.
- 13 Ahluwalia SC, Gill TM, Baker DI, et al. Perspectives of older persons on bathing and bathing  
14 disability: A qualitative study. *J Am Geriatr Soc*. 2010;58(3):450-6.
- 15 Almeida OP, Yeap BB, Hankey GJ, et al. Association of depression with sexual and daily activities:  
16 A community study of octogenarian men. *Am J Geriatr Psychiatry*. 2015;23(3):234-  
17 42.10.1016/j.jagp.2013.09.007.
- 18 Behm L, Eklund K, Wilhelmson K, et al. Health Promotion Can Postpone Frailty: Results from the  
19 RCT Elderly Persons in the Risk Zone. *Public Health Nurs*. 2016;33(4):303-  
20 15.10.1111/phn.12240.
- 21 Berkemeyer S, Schumacher J, Thiem U, et al. Bone T-scores and functional status: A cross-  
22 sectional study on german elderly. *PLoS ONE*. 2009;4(12).10.1371/journal.pone.0008216.
- 23 Blain H, Carriere I, Sourial N, et al. Balance and walking speed predict subsequent 8-year mortality  
24 independently of current and intermediate events in well-functioning women aged 75 years  
25 and older. *J Nutr Health Aging*. 2010;14(7):595-600.10.1007/s12603-010-0111-0.
- 26 Bollwein J, Diekmann R, Kaiser MJ, et al. Dietary quality is related to frailty in community-dwelling  
27 older adults. *J Gerontol A Biol Sci Med Sci*. 2013;68(4):483-9.10.1093/gerona/gls204.
- 28 Brännström H, Bäckman M, Fischer RS. Walking on the edge: Meanings of living in an ageing body  
29 and using a walker in everyday life - A phenomenological hermeneutic study. *International  
30 Journal of Older People Nursing*. 2013;8(2):116-22.10.1111/j.1748-3743.2012.00334.x.
- 31 Brown CJ, Kennedy RE, Lo AX, et al. Impact of Emergency Department Visits and Hospitalization  
32 on Mobility Among Community-Dwelling Older Adults. *Am J Med*. 2016;129(10):1124.e9-  
33 .e15.10.1016/j.amjmed.2016.05.016.
- 34 Byles JE, Leigh L, Vo K, et al. Life space and mental health: a study of older community-dwelling  
35 persons in Australia. *Aging & Mental Health*. 2015;19(2):98-  
36 106.10.1080/13607863.2014.917607.
- 37 Calvert JF, Kaye J, Leahy M, et al. Technology use by rural and urban oldest old. *Technol Health  
38 Care*. 2009;17(1):1-11.10.3233/THC-2009-0527.
- 39 Chipperfield JG, Newall NE, Chuchmach LP, et al. Differential determinants of men's and women's  
40 everyday physical activity in later life. *Journals of Gerontology - Series B Psychological  
41 Sciences and Social Sciences*. 2008;63(4):S211-S8.
- 42 Dahlin-Ivanoff S, Haak M, Fange A, et al. The multiple meaning of home as experienced by very old  
43 Swedish people. *Scandinavian journal of occupational therapy*. 2007;14(1):25-  
44 32.10.1080/11038120601151714.
- 45 Diez-Ruiz A, Bueno-Erandonea A, Nunez-Barrio J, et al. Factors associated with frailty in primary  
46 care: a prospective cohort study. *BMC Geriatr*. 2016;16:91.10.1186/s12877-016-0263-9.
- 47 Eckerblad J, Theander K, Ekdahl A, et al. To adjust and endure: a qualitative study of symptom  
48 burden in older people with multimorbidity. *Appl Nurs Res*. 2015;28(4):322-  
49 7.10.1016/j.apnr.2015.03.008.
- 50 El-Khoury F, Cassou B, Latouche A, et al. Effectiveness of two year balance training programme on  
51 prevention of fall induced injuries in at risk women aged 75-85 living in community: Ossébo  
52 randomised controlled trial. *BMJ (Online)*. 2015;351.10.1136/bmj.h3830.
- 53  
54  
55  
56  
57  
58  
59  
60

- 1  
2  
3 Eronen J, von Bonsdorff M, Rantakokko M, et al. Socioeconomic Status and Life-Space Mobility in  
4 Old Age. *Journal of aging and physical activity*. 2016;24(4):617-23.10.1123/japa.2015-0196.
- 5 Fabre JM, Wood RH, Cherry KE, et al. Age-related deterioration in flexibility is associated with  
6 health-related quality of life in nonagenarians. *J Geriatr Phys Ther*. 2007;30(1):16-22.
- 7 Fänge A, Ivanoff SD. The home is the hub of health in very old age: Findings from the ENABLE-  
8 AGE Project. *Arch Gerontol Geriatr*. 2009;48(3):340-5.10.1016/j.archger.2008.02.015.
- 9 Formiga F, Ferrer A, Padrós G, et al. Diabetes Mellitus as a Risk Factor for Functional and Cognitive  
10 Decline in Very Old People: The Octabaix Study. *Journal of the American Medical Directors  
11 Association*. 2014;15(12):924-8.10.1016/j.jamda.2014.07.019.
- 12 Formiga F, Ferrer A, Padros G, et al. Evidence of functional declining and global comorbidity  
13 measured at baseline proved to be the strongest predictors for long-term death in elderly  
14 community residents aged 85 years: A 5-year follow-up evaluation, the OCTABAIX study.  
15 *Clin Interv Aging*. 2016;11:437-44.10.2147/CIA.S101447.
- 16 Fritel X, Lachal L, Cassou B, et al. Mobility impairment is associated with urge but not stress urinary  
17 incontinence in community-dwelling older women: results from the Ossebo study. *BJOG*.  
18 2013;120(12):1566-72.10.1111/1471-0528.12316.
- 19 Gustafsson S, Eklund K, Wilhelmson K, et al. Long-term outcome for ADL following the health-  
20 promoting RCT - elderly persons in the risk zone. *Gerontologist*. 2013;53(4):654-  
21 63.10.1093/geront/gns121.
- 22 Gustafsson S, Wilhelmson K, Eklund K, et al. Health-promoting interventions for persons aged 80  
23 and older are successful in the short term - results from the randomized and three-armed  
24 Elderly Persons in the Risk Zone study. *J Am Geriatr Soc*. 2012;60(3):447-  
25 54.10.1111/j.1532-5415.2011.03861.x.
- 26 Haak M, Fänge A, Iwarsson S, et al. Home as a signification of independence and autonomy:  
27 Experiences among old Swedish people. *Scandinavian Journal of Occupational Therapy*.  
28 2007;14(1):16-24.10.1080/11038120601024929.
- 29 Hammar IO, Dahlin-Ivanoff S, Wilhelmson K, et al. Shifting between self-governing and being  
30 governed: A qualitative study of older persons' self-determination. *BMC Geriatr*.  
31 2014;14(1).10.1186/1471-2318-14-126.
- 32 Hegendörfer E, Vaes B, Andreeva E, et al. Predictive Value of Different Expressions of Forced  
33 Expiratory Volume in 1 Second (FEV1) for Adverse Outcomes in a Cohort of Adults Aged 80  
34 and Older. *Journal of the American Medical Directors Association*. 2017;18(2):123-  
35 30.10.1016/j.jamda.2016.08.012.
- 36 Heyl V, Wahl H. Cognitive ability as a resource for everyday functioning among older adults who are  
37 visually impaired. *Journal of Visual Impairment & Blindness*. 2010;104(7):391-403.
- 38 Hoeksema AR, Spoorenberg S, Peters LL, et al. Elderly with remaining teeth report less frailty and  
39 better quality of life than edentulous elderly: a cross-sectional study. *Oral Dis*.  
40 2017;23(4):526-36.10.1111/odi.12644.
- 41 Horgen G, Eilertsen G, Falkenberg H. Lighting old age - how lighting impacts the ability to grow old  
42 in own housing, part one. *Work*. 2012;41 Suppl 1:3385-7.10.3233/wor-2012-0612-3385.
- 43 Houston DK, Tooze JA, Davis CC, et al. Serum 25-hydroxyvitamin D and physical function in older  
44 adults: the Cardiovascular Health Study All Stars. *J Am Geriatr Soc*. 2011;59(10):1793-  
45 801.10.1111/j.1532-5415.2011.03601.x.
- 46 Idland G, Rydwik E, Smastuen MC, et al. Predictors of mobility in community-dwelling women aged  
47 85 and older. *Disabil Rehabil*. 2013;35(11):881-7.10.3109/09638288.2012.712195.
- 48 Iwarsson S, Horstmann V, Carlsson G, et al. Person-environment fit predicts falls in older adults  
49 better than the consideration of environmental hazards only. *Clin Rehabil*. 2009;23(6):558-  
50 67.10.1177/0269215508101740.
- 51  
52  
53  
54  
55  
56  
57  
58  
59  
60

- 1  
2  
3 Landi F, Russo A, Liperoti R, et al. Anorexia, physical function, and incident disability among the frail  
4 elderly population: Results from the iSIRENTE study. *Journal of the American Medical*  
5 *Directors Association*. 2010;11(4):268-74.10.1016/j.jamda.2009.12.088.  
6  
7 Landi F, Russo A, Liperoti R, et al. Midarm muscle circumference, physical performance and  
8 mortality: Results from the aging and longevity study in the Sirente geographic area  
9 (iSIRENTE study). *Clin Nutr*. 2010;29(4):441-7.10.1016/j.clnu.2009.12.006.  
10  
11 Larsson A, Haglund L, Hagberg J. Doing everyday life-experiences of the oldest old. *Scandinavian*  
12 *Journal of Occupational Therapy*. 2009;16(2):99-109.10.1080/11038120802409762.  
13  
14 Laudisio A, Marzetti E, Antonica L, et al. Metabolic syndrome and quality of life in the elderly: Age  
15 and gender differences. *Eur J Nutr*. 2013;52(1):307-16.  
16  
17 Laudisio A, Marzetti E, Franceschi F, et al. Disability is associated with emergency room visits in the  
18 elderly: a population-based study. *Aging Clin Exp Res*. 2015;27(5):663-71.10.1007/s40520-  
19 015-0324-5.  
20  
21 Laudisio A, Marzetti E, Pagano F, et al. Masticatory dysfunction is associated with worse functional  
22 ability: a population-based study. *J Clin Periodontol*. 2010;37(2):113-9.10.1111/j.1600-  
23 051X.2009.01518.x.  
24  
25 Lofqvist C, Tomsone S, Iwarsson S, et al. Changes in Home and Health over Nine Years among  
26 very Old People in Latvia - Results from the ENABLE-AGE Project. *Journal of cross-cultural*  
27 *gerontology*. 2017;32(1):17-29.  
28  
29 Mahler M, Sarvimäki A. Fear of falling from a daily life perspective; narratives from later life. *Scand J*  
30 *Caring Sci*. 2012;26(1):38-44.10.1111/j.1471-6712.2011.00901.x.  
31  
32 Mangani I, Cesari M, Russo A, et al. Physical function, physical activity and recent falls. Results  
33 from the 'Invecchiamento e Longevità nel Sirente (iSIRENTE)' Study. *Aging Clinical &*  
34 *Experimental Research*. 2008;20(3):234-41.  
35  
36 Manty M, Rantanen T, Era P, et al. Fatigue and depressive symptoms in older people. *J Appl*  
37 *Gerontol*. 2014;33(4):505-14.10.1177/0733464812454011.  
38  
39 Mikkola TM, Polku H, Portegijs E, et al. Self-reported hearing is associated with time spent out-of-  
40 home and withdrawal from leisure activities in older community-dwelling adults. *Aging Clin*  
41 *Exp Res*. 2016;28(2):297-302.10.1007/s40520-015-0389-1.  
42  
43 Mikkola TM, Portegijs E, Rantakokko M, et al. Association of self-reported hearing difficulty to  
44 objective and perceived participation outside the home in older community-dwelling adults. *J*  
45 *Aging Health*. 2015;27(1):103-22.10.1177/0898264314538662.  
46  
47 Murabito JM, Pencina MJ, Kelly-Hayes M, et al. Temporal trends in self-reported functional  
48 limitations and physical disability among the community-dwelling elderly population: the  
49 Framingham Heart Study. *Am J Public Health*. 2008;98(7):1256-  
50 62.10.2105/AJPH.2007.128132.  
51  
52 Muscari A, Bianchi G, Forti P, et al. Physical Activity and Other Determinants of Survival in the  
53 Oldest Adults. *J Am Geriatr Soc*. 2017;65(2):402-6.10.1111/jgs.14569.  
54  
55 Nitsch D, Mann AG, Bulpitt C, et al. Impairment of kidney function and reduced quality-of-life in older  
56 people: A cross-sectional study. *Age Ageing*. 2011;40(3):381-7.10.1093/ageing/afw024.  
57  
58 Nykänen I, Lönnroos E, Kautiainen H, et al. Nutritional screening in a population-based cohort of  
59 community-dwelling older people. *European Journal of Public Health*. 2013;23(3):405-  
60 9.10.1093/eurpub/cks026.  
61  
62 Polku H, Mikkola TM, Rantakokko M, et al. Self-reported hearing difficulties and changes in life-  
63 space mobility among community-dwelling older adults: a Two-year follow-Up study. *BMC*  
64 *Geriatr*. 2015;15:121.10.1186/s12877-015-0119-8.  
65  
66 Portegijs E, Rantakokko M, Viljanen A, et al. Is frailty associated with life-space mobility and  
67 perceived autonomy in participation outdoors? A longitudinal study. *Age & Ageing*.  
68 2016;45(4):550-3.10.1093/ageing/afw072.



- 1  
2  
3 Quail JM, Addona V, Wolfson C, et al. Association of unmet need with self-rated health in a  
4 community dwelling cohort of disabled seniors 75 years of age and over. *European Journal*  
5 *of Ageing*. 2007;4(1):45-55.10.1007/s10433-007-0042-8.  
6  
7 Rantakokko M, Iwarsson S, Vahaluoto S, et al. Perceived environmental barriers to outdoor mobility  
8 and feelings of loneliness among community-dwelling older people. *Journals of Gerontology -*  
9 *Series A Biological Sciences and Medical Sciences*. 2014;69(12):1562-  
10 8.10.1093/gerona/glu069.  
11 Rantakokko M, Portegijs E, Viljanen A, et al. Mobility Modification Alleviates Environmental Influence  
12 on Incident Mobility Difficulty among Community-Dwelling Older People: A Two-Year Follow-  
13 Up Study. *PLoS ONE*. 2016;11(4):e0154396.10.1371/journal.pone.0154396.  
14  
15 Rantz M, Lane K, Phillips LJ, et al. Enhanced registered nurse care coordination with sensor  
16 technology: Impact on length of stay and cost in aging in place housing. *Nurs Outlook*.  
17 2015;63(6):650-5.10.1016/j.outlook.2015.08.004.  
18  
19 Rao SK, Wallace LMK, Theou O, et al. Is it better to be happy or not depressed? Depression  
20 mediates the effect of psychological well-being on adverse health outcomes in older adults.  
21 *Int J Geriatr Psychiatry*. 2016.10.1002/gps.4559.  
22 Rapo-Pylkko S, Haanpaa M, Liira H. Chronic pain among community-dwelling elderly: a population-  
23 based clinical study. *Scand J Prim Health Care*. 2016;34(2):159-  
24 64.10.3109/02813432.2016.1160628.  
25  
26 Rasinaho M, Hirvensalo M, Leinonen R, et al. Motives for and barriers to physical activity among  
27 older adults with mobility limitations. *Journal of Aging and Physical Activity*. 2007;15(1):90-  
28 102.  
29  
30 Richards J, Rankaduwa W. Housing Canada's oldest-old: correlates of their residential status.  
31 *Journal of Housing for the Elderly*. 2008;22(4):376-403.  
32  
33 Rydwick E, Frändin K, Akner G. Effects of a physical training and nutritional intervention program in  
34 frail elderly people regarding habitual physical activity level and activities of daily living-A  
35 randomized controlled pilot study. *Arch Gerontol Geriatr*. 2010;51(3):283-  
36 9.10.1016/j.archger.2009.12.001.  
37  
38 Rydwick E, Lammes E, Frändin K, et al. Effects of a physical and nutritional intervention program for  
39 frail elderly people over age 75. A randomized controlled pilot treatment trial. *Aging Clinical*  
40 *and Experimental Research*. 2008;20(2):159-70.  
41  
42 Sabayan B, Oleksik AM, Maier AB, et al. High blood pressure and resilience to physical and  
43 cognitive decline in the oldest old: The Leiden 85-Plus Study. *J Am Geriatr Soc*.  
44 2012;60(11):2014-9.  
45  
46 Sallinen M, Hentonen O, Karki A. Technology and active agency of older adults living in service  
47 house environment. *Disability and Rehabilitation Assistive technology*. 2015;10(1):27-  
48 31.10.3109/17483107.2013.836685.  
49  
50 Sampson EL, Bulpitt CJ, Fletcher AE. Survival of Community-dwelling older people: The effect of  
51 cognitive impairment and social engagement. *J Am Geriatr Soc*. 2009;57(6):985-91.  
52  
53 Savikko N, Routasalo P, Tilvis R, et al. Psychosocial group rehabilitation for lonely older people:  
54 Favourable processes and mediating factors of the intervention leading to alleviated  
55 loneliness. *International Journal of Older People Nursing*. 2010;5(1):16-24.10.1111/j.1748-  
56 3743.2009.00191.x.  
57  
58 Sixsmith J, Sixsmith A, Fange AM, et al. Healthy ageing and home: The perspectives of very old  
59 people in five european countries. *Soc Sci Med*. 2014;106:1-9.  
60  
61  
62  
63  
64  
65  
66  
67  
68  
69  
70  
71  
72  
73  
74  
75  
76  
77  
78  
79  
80  
81  
82  
83  
84  
85  
86  
87  
88  
89  
90  
91  
92  
93  
94  
95  
96  
97  
98  
99  
100  
101  
102  
103  
104  
105  
106  
107  
108  
109  
110  
111  
112  
113  
114  
115  
116  
117  
118  
119  
120  
121  
122  
123  
124  
125  
126  
127  
128  
129  
130  
131  
132  
133  
134  
135  
136  
137  
138  
139  
140  
141  
142  
143  
144  
145  
146  
147  
148  
149  
150  
151  
152  
153  
154  
155  
156  
157  
158  
159  
160  
161  
162  
163  
164  
165  
166  
167  
168  
169  
170  
171  
172  
173  
174  
175  
176  
177  
178  
179  
180  
181  
182  
183  
184  
185  
186  
187  
188  
189  
190  
191  
192  
193  
194  
195  
196  
197  
198  
199  
200  
201  
202  
203  
204  
205  
206  
207  
208  
209  
210  
211  
212  
213  
214  
215  
216  
217  
218  
219  
220  
221  
222  
223  
224  
225  
226  
227  
228  
229  
230  
231  
232  
233  
234  
235  
236  
237  
238  
239  
240  
241  
242  
243  
244  
245  
246  
247  
248  
249  
250  
251  
252  
253  
254  
255  
256  
257  
258  
259  
260  
261  
262  
263  
264  
265  
266  
267  
268  
269  
270  
271  
272  
273  
274  
275  
276  
277  
278  
279  
280  
281  
282  
283  
284  
285  
286  
287  
288  
289  
290  
291  
292  
293  
294  
295  
296  
297  
298  
299  
300  
301  
302  
303  
304  
305  
306  
307  
308  
309  
310  
311  
312  
313  
314  
315  
316  
317  
318  
319  
320  
321  
322  
323  
324  
325  
326  
327  
328  
329  
330  
331  
332  
333  
334  
335  
336  
337  
338  
339  
340  
341  
342  
343  
344  
345  
346  
347  
348  
349  
350  
351  
352  
353  
354  
355  
356  
357  
358  
359  
360  
361  
362  
363  
364  
365  
366  
367  
368  
369  
370  
371  
372  
373  
374  
375  
376  
377  
378  
379  
380  
381  
382  
383  
384  
385  
386  
387  
388  
389  
390  
391  
392  
393  
394  
395  
396  
397  
398  
399  
400  
401  
402  
403  
404  
405  
406  
407  
408  
409  
410  
411  
412  
413  
414  
415  
416  
417  
418  
419  
420  
421  
422  
423  
424  
425  
426  
427  
428  
429  
430  
431  
432  
433  
434  
435  
436  
437  
438  
439  
440  
441  
442  
443  
444  
445  
446  
447  
448  
449  
450  
451  
452  
453  
454  
455  
456  
457  
458  
459  
460  
461  
462  
463  
464  
465  
466  
467  
468  
469  
470  
471  
472  
473  
474  
475  
476  
477  
478  
479  
480  
481  
482  
483  
484  
485  
486  
487  
488  
489  
490  
491  
492  
493  
494  
495  
496  
497  
498  
499  
500  
501  
502  
503  
504  
505  
506  
507  
508  
509  
510  
511  
512  
513  
514  
515  
516  
517  
518  
519  
520  
521  
522  
523  
524  
525  
526  
527  
528  
529  
530  
531  
532  
533  
534  
535  
536  
537  
538  
539  
540  
541  
542  
543  
544  
545  
546  
547  
548  
549  
550  
551  
552  
553  
554  
555  
556  
557  
558  
559  
560  
561  
562  
563  
564  
565  
566  
567  
568  
569  
570  
571  
572  
573  
574  
575  
576  
577  
578  
579  
580  
581  
582  
583  
584  
585  
586  
587  
588  
589  
590  
591  
592  
593  
594  
595  
596  
597  
598  
599  
600  
601  
602  
603  
604  
605  
606  
607  
608  
609  
610  
611  
612  
613  
614  
615  
616  
617  
618  
619  
620  
621  
622  
623  
624  
625  
626  
627  
628  
629  
630  
631  
632  
633  
634  
635  
636  
637  
638  
639  
640  
641  
642  
643  
644  
645  
646  
647  
648  
649  
650  
651  
652  
653  
654  
655  
656  
657  
658  
659  
660  
661  
662  
663  
664  
665  
666  
667  
668  
669  
670  
671  
672  
673  
674  
675  
676  
677  
678  
679  
680  
681  
682  
683  
684  
685  
686  
687  
688  
689  
690  
691  
692  
693  
694  
695  
696  
697  
698  
699  
700  
701  
702  
703  
704  
705  
706  
707  
708  
709  
710  
711  
712  
713  
714  
715  
716  
717  
718  
719  
720  
721  
722  
723  
724  
725  
726  
727  
728  
729  
730  
731  
732  
733  
734  
735  
736  
737  
738  
739  
740  
741  
742  
743  
744  
745  
746  
747  
748  
749  
750  
751  
752  
753  
754  
755  
756  
757  
758  
759  
760  
761  
762  
763  
764  
765  
766  
767  
768  
769  
770  
771  
772  
773  
774  
775  
776  
777  
778  
779  
780  
781  
782  
783  
784  
785  
786  
787  
788  
789  
790  
791  
792  
793  
794  
795  
796  
797  
798  
799  
800  
801  
802  
803  
804  
805  
806  
807  
808  
809  
810  
811  
812  
813  
814  
815  
816  
817  
818  
819  
820  
821  
822  
823  
824  
825  
826  
827  
828  
829  
830  
831  
832  
833  
834  
835  
836  
837  
838  
839  
840  
841  
842  
843  
844  
845  
846  
847  
848  
849  
850  
851  
852  
853  
854  
855  
856  
857  
858  
859  
860  
861  
862  
863  
864  
865  
866  
867  
868  
869  
870  
871  
872  
873  
874  
875  
876  
877  
878  
879  
880  
881  
882  
883  
884  
885  
886  
887  
888  
889  
890  
891  
892  
893  
894  
895  
896  
897  
898  
899  
900  
901  
902  
903  
904  
905  
906  
907  
908  
909  
910  
911  
912  
913  
914  
915  
916  
917  
918  
919  
920  
921  
922  
923  
924  
925  
926  
927  
928  
929  
930  
931  
932  
933  
934  
935  
936  
937  
938  
939  
940  
941  
942  
943  
944  
945  
946  
947  
948  
949  
950  
951  
952  
953  
954  
955  
956  
957  
958  
959  
960  
961  
962  
963  
964  
965  
966  
967  
968  
969  
970  
971  
972  
973  
974  
975  
976  
977  
978  
979  
980  
981  
982  
983  
984  
985  
986  
987  
988  
989  
990  
991  
992  
993  
994  
995  
996  
997  
998  
999  
1000

- 1  
2  
3 Tsai LT, Portegijs E, Rantakokko M, et al. The association between objectively measured physical  
4 activity and life-space mobility among older people. *Scand J Med Sci Sports*.  
5 2015;25(4):e368-73.10.1111/sms.12337.  
6  
7 Tsai LT, Rantakokko M, Portegijs E, et al. Environmental mobility barriers and walking for errands  
8 among older people who live alone vs. with others. *BMC Public Health*.  
9 2013;13(1).10.1186/1471-2458-13-1054.  
10  
11 van Bommel T, Delgado V, Bax JJ, et al. Impact of valvular heart disease on activities of daily living  
12 of nonagenarians: the Leiden 85-plus study a population based study. *BMC Geriatr*.  
13 2010;10:17.10.1186/1471-2318-10-17.  
14  
15 van Houwelingen AH, den Elzen WP, le Cessie S, et al. Consequences of interaction of functional,  
16 somatic, mental and social problems in community-dwelling older people. *PLoS ONE*.  
17 2015;10(4):e0121013.10.1371/journal.pone.0121013.  
18  
19 Vasara P. Not ageing in place: Negotiating meanings of residency in age-related housing. *Journal of*  
20 *aging studies*. 2015;35:55-64.10.1016/j.jaging.2015.07.004.  
21  
22 Vestergaard S, Kronborg C, Puggaard L. Home-based video exercise intervention for community-  
23 dwelling frail older women: A randomized controlled trial. *Aging Clin Exp Res*.  
24 2008;20(5):479-86.  
25  
26 Von Humboldt S, Leal I. The Old and the Oldest-old: Do They Have Different Perspectives on  
27 Adjustment to Aging? *International Journal of Gerontology*. 2015;9(3):156-60.  
28  
29 Wang K, Delbaere K, Brodie M, et al. Differences between Gait on Stairs and Flat Surfaces in  
30 Relation to Fall Risk and Future Falls. *IEEE journal of biomedical and health informatics*.  
31 2017.10.1109/jbhi.2017.2677901.  
32  
33 Werth BL, Williams KA, Pont LG. Laxative Use and Self-Reported Constipation in a Community-  
34 Dwelling Elderly Population: A Community-Based Survey From Australia. *Gastroenterol*  
35 *Nurs*. 2017;40(2):134-41.10.1097/sga.000000000000144.  
36  
37 Williams ID, O'Doherty LJ, Mitchell GK, et al. Identifying unmet needs in older patients: Nurse-GP  
38 collaboration in general practice. *Aust Fam Physician*. 2007;36(9):772-6.  
39  
40 Wilson K, Mottram P, Sixsmith A. Depressive symptoms in the very old living alone: Prevalence,  
41 incidence and risk factors. *Int J Geriatr Psychiatry*. 2007;22(4):361-6.10.1002/gps.1682.  
42  
43 Wong CH, Weiss D, Sourial N, et al. Frailty and its association with disability and comorbidity in a  
44 community-dwelling sample of seniors in Montreal: A cross-sectional study. *Aging Clin Exp*  
45 *Res*. 2010;22(1):54-62.10.3275/6675.  
46  
47 Young Y. Factors Associated With Permanent Transition From Independent Living to Nursing Home  
48 in a Continuing Care Retirement Community. *Journal of the American Medical Directors*  
49 *Association*. 2009;10(7):491-7.10.1016/j.jamda.2009.03.019.  
50  
51 Zingmond DS, Ettner SL, Wilber KH, et al. Association of claims-based quality of care measures  
52 with outcomes among community-dwelling vulnerable elders. *Med Care*. 2011;49(6):553-  
53 9.10.1097/MLR.0b013e31820e5aab.  
54  
55  
56  
57  
58  
59  
60

## Appendix B

## Characteristics of included studies

| Study                    | Methods   |                                                        |                                                                                |                                                            |                | Demographics       |         |               |  |
|--------------------------|-----------|--------------------------------------------------------|--------------------------------------------------------------------------------|------------------------------------------------------------|----------------|--------------------|---------|---------------|--|
|                          | Country   | Design                                                 | Type of intervention<br>(if applicable)                                        | Type of control<br>(if applicable)                         | Sample<br>size | Type of<br>sample  | Age     | Female<br>(%) |  |
| Aartolahti et al. (2013) | Finland   | cross-sectional study                                  | multidisciplinary intervention, focused on medication, nutrition, and exercise | n/a                                                        | 576            | community-dwelling | 76-100  | 70.0          |  |
| Abellan et al. (2013)    | France    | cross-sectional study                                  | n/a                                                                            | n/a                                                        | 3,025          | community-dwelling | ≥75     | 100.0         |  |
| Ahluwalia et al. (2010)  | USA       | qualitative study using interviews and grounded theory | n/a                                                                            | n/a                                                        | 23             | community-dwelling | ≥78     | 61.0          |  |
| Almeida et al. (2015)    | Australia | cross-sectional study                                  | n/a                                                                            | n/a                                                        | 1,649          | community-dwelling | 80-93.7 | 0.0           |  |
| Behm et al. (2015)       | Sweden    | RCT with follow-up after 1 and 2 years                 | preventive home visit group, senior meeting group                              | access to the ordinary range of services for older persons | 459            | community-dwelling | 80-97   | 64.0          |  |
| Berkemeyer et al. (2009) | Germany   | cross-sectional study                                  | n/a                                                                            | n/a                                                        | 440            | community-dwelling | ≥75     | 44.8          |  |
| Blain et al. (2010)      | France    | longitudinal study                                     | n/a                                                                            | n/a                                                        | 1300           | community-dwelling | ≥75     | 100.0         |  |
| Bollwein et al. (2013)   | Germany   | cross-sectional                                        | n/a                                                                            | n/a                                                        | 192            | community-dwelling | 75-96   | 64.6          |  |

|    |                |           |                |     |     |     |            |       |      |  |
|----|----------------|-----------|----------------|-----|-----|-----|------------|-------|------|--|
| 1  |                |           | study          |     |     |     |            |       |      |  |
| 2  |                |           |                |     |     |     |            |       |      |  |
| 3  |                |           |                |     |     |     |            |       |      |  |
| 4  | Brännström     | Sweden    | qualitative    | n/a | n/a | 7   | community- | 79-95 | 85.7 |  |
| 5  | et al. (2013)  |           | study using    |     |     |     | dwelling   |       |      |  |
| 6  |                |           | narrative      |     |     |     |            |       |      |  |
| 7  |                |           | interviews and |     |     |     |            |       |      |  |
| 8  |                |           | phenomenolo    |     |     |     |            |       |      |  |
| 9  |                |           | gical          |     |     |     |            |       |      |  |
| 10 |                |           | hermeneutic    |     |     |     |            |       |      |  |
| 11 |                |           | method         |     |     |     |            |       |      |  |
| 12 |                |           |                |     |     |     |            |       |      |  |
| 13 | Brown et al.   | USA       | longitudinal   | n/a | n/a | 410 | community- | ≥75   | 57.0 |  |
| 14 | (2016)         |           | cohort study   |     |     |     | dwelling   |       |      |  |
| 15 |                |           |                |     |     |     |            |       |      |  |
| 16 | Byles et al.   | Australia | cross-         | n/a | n/a | 260 | community- | 75-80 | 50.4 |  |
| 17 | (2015)         |           | sectional      |     |     |     | dwelling   |       |      |  |
| 18 |                |           | study          |     |     |     |            |       |      |  |
| 19 |                |           |                |     |     |     |            |       |      |  |
| 20 | Calvert et al. | USA       | cross-         | n/a | n/a | 306 | community- | ≥85   | 62.0 |  |
| 21 | (2009)         |           | sectional      |     |     |     | dwelling   |       |      |  |
| 22 |                |           | study          |     |     |     |            |       |      |  |
| 23 | Chipperfield   | Canada    | prospective    | n/a | n/a | 198 | community- | 80-98 | 63.1 |  |
| 24 | et al. (2008)  |           | cohort study   |     |     |     | dwelling   |       |      |  |
| 25 |                |           |                |     |     |     |            |       |      |  |
| 26 | Dahlin-        | Sweden    | qualitative    | n/a | n/a | 40  | community- | 80-89 | 57.5 |  |
| 27 | Ivanoff et al. |           | study using    |     |     |     | dwelling   |       |      |  |
| 28 | (2007)         |           | interviews and |     |     |     |            |       |      |  |
| 29 |                |           | grounded       |     |     |     |            |       |      |  |
| 30 |                |           | theory         |     |     |     |            |       |      |  |
| 31 |                |           |                |     |     |     |            |       |      |  |
| 32 | Diez-Ruiz et   | Spain     | prospective    | n/a | n/a | 215 | community  | ≥75   | 63.0 |  |
| 33 | al. (2016)     |           | cohort study   |     |     |     | dwelling   |       |      |  |
| 34 |                |           | with 2 years   |     |     |     |            |       |      |  |
| 35 |                |           | follow-up      |     |     |     |            |       |      |  |
| 36 | Eckerblad et   | Sweden    | qualitative    | n/a | n/a | 20  | community- | 79-89 | 80.0 |  |
| 37 | al. (2015)     |           | study using    |     |     |     | dwelling   |       |      |  |
| 38 |                |           | semi-          |     |     |     |            |       |      |  |
| 39 |                |           | structured     |     |     |     |            |       |      |  |
| 40 |                |           |                |     |     |     |            |       |      |  |
| 41 |                |           |                |     |     |     |            |       |      |  |
| 42 |                |           |                |     |     |     |            |       |      |  |
| 43 |                |           |                |     |     |     |            |       |      |  |
| 44 |                |           |                |     |     |     |            |       |      |  |
| 45 |                |           |                |     |     |     |            |       |      |  |
| 46 |                |           |                |     |     |     |            |       |      |  |

1  
2  
3  
4  
5  
6  
7  
8  
9  
10  
11  
12  
13  
14  
15  
16  
17  
18  
19  
20  
21  
22  
23  
24  
25  
26  
27  
28  
29  
30  
31  
32  
33  
34  
35  
36  
37  
38  
39  
40  
41  
42  
43  
44  
45  
46

interviews and  
content  
analysis

|                          |         |                                                        |                                                                                                                                                                                  |     |                                                                                 |       |                    |       |       |
|--------------------------|---------|--------------------------------------------------------|----------------------------------------------------------------------------------------------------------------------------------------------------------------------------------|-----|---------------------------------------------------------------------------------|-------|--------------------|-------|-------|
| El-Khoury et al. (2015)  | France  | RCT                                                    | 2-year exercise programme of progressive balance retraining in reducing injurious falls, weekly supervised group sessions supplemented by individually prescribed home exercises | n/a | brochures about fall prevention, newsletters, four free exercise sessions       | 706   | community-dwelling | 75-85 | 100.0 |
| Eronen et al. (2016)     | Finland | cross-sectional study                                  | n/a                                                                                                                                                                              | n/a | n/a                                                                             | 848   | community-dwelling | 75-90 | 62.0  |
| Fabre et al. (2007)      | USA     | population-based cohort study                          | n/a                                                                                                                                                                              | n/a | n/a                                                                             | 74    | community-dwelling | ≥90   | 51.3  |
| Fänge et al. (2009)      | Sweden  | qualitative study using interviews and grounded theory | n/a                                                                                                                                                                              | n/a | n/a                                                                             | 40    | community-dwelling | 80-89 | 57.5  |
| Formiga et al. (2014)    | Spain   | longitudinal study                                     | n/a                                                                                                                                                                              | n/a | n/a                                                                             | 167   | community-dwelling | ≥85   | 60.5  |
| Formiga et al. (2016)    | Spain   | RCT with 5-year follow-up                              | falls and malnutrition prevention                                                                                                                                                | n/a | general primary care assessment                                                 | 328   | community-dwelling | ≥85   | 61.6  |
| Fritel et al. (2013)     | France  | observational cross-sectional study                    | n/a                                                                                                                                                                              | n/a | n/a                                                                             | 1,942 | community-dwelling | 75-85 | 100.0 |
| Gustafsson et al. (2013) | Sweden  | RCT                                                    | preventive home visit group, senior meeting group                                                                                                                                | n/a | ordinary range of community services offered by the municipal care for the aged | 459   | community-dwelling | 80-97 | 64.0  |

|    |               |           |                |                              |                             |      |            |       |      |  |
|----|---------------|-----------|----------------|------------------------------|-----------------------------|------|------------|-------|------|--|
| 1  |               |           |                |                              |                             |      |            |       |      |  |
| 2  |               |           |                |                              |                             |      |            |       |      |  |
| 3  | Gustafsson    | Sweden    | RCT            | preventive home visit group, | access to the ordinary      | 459  | community- | 80-97 | 64.0 |  |
| 4  | et al. (2012) |           |                | senior meeting group         | range of community services |      | dwelling   |       |      |  |
| 5  |               |           |                |                              | offered by the municipal    |      |            |       |      |  |
| 6  |               |           |                |                              | agency                      |      |            |       |      |  |
| 7  |               |           |                |                              |                             |      |            |       |      |  |
| 8  | Haak et al.   | Sweden    | qualitative    | n/a                          | n/a                         | 40   | community- | 80-89 | 57.5 |  |
| 9  | (2007)        |           | study using    |                              |                             |      | dwelling   |       |      |  |
| 10 |               |           | interviews and |                              |                             |      |            |       |      |  |
| 11 |               |           | grounded       |                              |                             |      |            |       |      |  |
| 12 |               |           | theory         |                              |                             |      |            |       |      |  |
| 13 | Ottenval      | Sweden    | qualitative    | n/a                          | n/a                         | 11   | community- | 84-95 | 54.5 |  |
| 14 | Hammar et     |           | study using    |                              |                             |      | dwelling   |       |      |  |
| 15 | al. (2014)    |           | interviews and |                              |                             |      |            |       |      |  |
| 16 |               |           | grounded       |                              |                             |      |            |       |      |  |
| 17 |               |           | theory         |                              |                             |      |            |       |      |  |
| 18 |               |           |                |                              |                             |      |            |       |      |  |
| 19 | Hegendörfer   | Belgium   | prospective,   | n/a                          | n/a                         | 501  | community- | ≥80   | 63.0 |  |
| 20 | et al. (2017) |           | observational, |                              |                             |      | dwelling   |       |      |  |
| 21 |               |           | population     |                              |                             |      |            |       |      |  |
| 22 |               |           | based          |                              |                             |      |            |       |      |  |
| 23 |               |           | cohort study   |                              |                             |      |            |       |      |  |
| 24 |               |           |                |                              |                             |      |            |       |      |  |
| 25 | Heyl & Wahl   | Germany   | cross-         | n/a                          | n/a                         | 271  | community- | 75-94 | 54   |  |
| 26 | (2010)        |           | sectional      |                              |                             |      | dweeling   |       |      |  |
| 27 |               |           | study          |                              |                             |      |            |       |      |  |
| 28 |               |           |                |                              |                             |      |            |       |      |  |
| 29 | Hoeksema      | Netherlan | cross-         | n/a                          | n/a                         | 1026 | community- | ≥75   | 59.0 |  |
| 30 | et al. (2017) | ds        | sectional      |                              |                             |      | dwelling   |       |      |  |
| 31 |               |           | study          |                              |                             |      |            |       |      |  |
| 32 | Horgen et al. | Norway    | mixed          | n/a                          | n/a                         | 165  | community- | 75    | n/a  |  |
| 33 | (2012)        |           | methods        |                              |                             |      | dwelling   |       |      |  |
| 34 |               |           | study          |                              |                             |      |            |       |      |  |
| 35 |               |           |                |                              |                             |      |            |       |      |  |
| 36 | Houston et    | USA       | secondary      | n/a                          | n/a                         | 988  | community- | 77-   | 64.5 |  |
| 37 | al. (2011)    |           | analysis of a  |                              |                             |      | dwelling   | 100   |      |  |
| 38 |               |           | longitudinal   |                              |                             |      |            |       |      |  |
| 39 |               |           | study with 3   |                              |                             |      |            |       |      |  |
| 40 |               |           | years of       |                              |                             |      |            |       |      |  |
| 41 |               |           |                |                              |                             |      |            |       |      |  |
| 42 |               |           |                |                              |                             |      |            |       |      |  |
| 43 |               |           |                |                              |                             |      |            |       |      |  |
| 44 |               |           |                |                              |                             |      |            |       |      |  |
| 45 |               |           |                |                              |                             |      |            |       |      |  |
| 46 |               |           |                |                              |                             |      |            |       |      |  |

1  
2  
3  
4  
5  
6  
7  
8  
9  
10  
11  
12  
13  
14  
15  
16  
17  
18  
19  
20  
21  
22  
23  
24  
25  
26  
27  
28  
29  
30  
31  
32  
33  
34  
35  
36  
37  
38  
39  
40  
41  
42  
43  
44  
45  
46

For peer review only

follow-up

|                        |                         |                                                                                       |     |     |                                   |                    |       |       |
|------------------------|-------------------------|---------------------------------------------------------------------------------------|-----|-----|-----------------------------------|--------------------|-------|-------|
| Idland et al. (2013)   | Norway                  | prospective , observational cohort study with 9 years follow-up                       | n/a | n/a | 307 (baseline)<br>113 (follow-up) | community-dwelling | 75-92 | 100.0 |
| Iwarsson et al. (2009) | Sweden, Germany, Latvia | secondary analysis of a longitudinal survey study with 1 year follow-up               | n/a | n/a | 834                               | community-dwelling | 75-89 | 79.7  |
| Landi et al. (2010a)   | Italy                   | secondary analysis of a prospective cohort study (baseline)                           | n/a | n/a | 357                               | community-dwelling | ≥80   | 67.0  |
| Landi et al. (2010b)   | Italy                   | secondary analysis of a prospective cohort study with 2 years follow-up               | n/a | n/a | 364 (baseline)<br>205 (follow-up) | community-dwelling | ≥80   | 67.0  |
| Larsson et al. (2009)  | Sweden                  | qualitative study using interviews, observations and phenomenological method (Giorgi) | n/a | n/a | 18                                | community-dwelling | 86-93 | 55.6  |
| Laudisio et al. (2013) | Italy                   | cross-sectional                                                                       | n/a | n/a | 356                               | community-dwelling | ≥75   | 54.5  |

|    |              |          |                |     |     |     |            |       |       |  |
|----|--------------|----------|----------------|-----|-----|-----|------------|-------|-------|--|
| 1  |              |          | study          |     |     |     |            |       |       |  |
| 2  |              |          |                |     |     |     |            |       |       |  |
| 3  |              |          |                |     |     |     |            |       |       |  |
| 4  | Laudisio et  | Italy    | longitudinal,  | n/a | n/a | 342 | community- | ≥75   | 56.0  |  |
| 5  | al. (2015)   |          | population-    |     |     |     | dwelling   |       |       |  |
| 6  |              |          | based study    |     |     |     |            |       |       |  |
| 7  |              |          | with 1-year    |     |     |     |            |       |       |  |
| 8  |              |          | follow-up      |     |     |     |            |       |       |  |
| 9  |              |          |                |     |     |     |            |       |       |  |
| 10 | Laudisio et  | Italy    | cross-         | n/a | n/a | 350 | community- | ≥75   | 54.3  |  |
| 11 | al. (2010)   |          | sectional      |     |     |     | dwelling   |       |       |  |
| 12 |              |          | study          |     |     |     |            |       |       |  |
| 13 |              |          |                |     |     |     |            |       |       |  |
| 14 | Lofqvist et  | Latvia   | secondary      | n/a | n/a | 59  | community- | 77-90 | 90.0  |  |
| 15 | al. (2017)   |          | analysis of a  |     |     |     | dwelling   |       |       |  |
| 16 |              |          | longitudinal   |     |     |     |            |       |       |  |
| 17 |              |          | study with 9   |     |     |     |            |       |       |  |
| 18 |              |          | years follow-  |     |     |     |            |       |       |  |
| 19 |              |          | up             |     |     |     |            |       |       |  |
| 20 |              |          |                |     |     |     |            |       |       |  |
| 21 | Mahler &     | Denmark  | qualitative    | n/a | n/a | 5   | community- | 81-94 | 100.0 |  |
| 22 | Sarvimäki    |          | study using    |     |     |     | dwelling   |       |       |  |
| 23 | (2012)       |          | narrative      |     |     |     |            |       |       |  |
| 24 |              |          | interviews and |     |     |     |            |       |       |  |
| 25 |              |          | thematic       |     |     |     |            |       |       |  |
| 26 |              |          | analysis       |     |     |     |            |       |       |  |
| 27 |              |          |                |     |     |     |            |       |       |  |
| 28 | Mangani et   | Italy    | secondary      | n/a | n/a | 364 | community- | ≥80   | 67.0  |  |
| 29 | al. (2008)   |          | analysis of a  |     |     |     | dwelling   |       |       |  |
| 30 |              |          | prospective    |     |     |     |            |       |       |  |
| 31 |              |          | cohort study   |     |     |     |            |       |       |  |
| 32 |              |          |                |     |     |     |            |       |       |  |
| 33 | Mänty et al. | Denmark, | secondary      | n/a | n/a | 561 | community- | 75    | 55.0  |  |
| 34 | (2014)       | Finland  | analysis of a  |     |     |     | dwelling   |       |       |  |
| 35 |              |          | longitudinal   |     |     |     |            |       |       |  |
| 36 |              |          | study          |     |     |     |            |       |       |  |
| 37 |              |          |                |     |     |     |            |       |       |  |
| 38 | Mikkola et   | Finland  | secondary      | n/a | n/a | 766 | community- | 75-90 | 62.7  |  |
| 39 | al. (2016)   |          | analysis of a  |     |     |     | dwelling   |       |       |  |
| 40 |              |          | cross          |     |     |     |            |       |       |  |
| 41 |              |          | sectional and  |     |     |     |            |       |       |  |
| 42 |              |          |                |     |     |     |            |       |       |  |
| 43 |              |          |                |     |     |     |            |       |       |  |
| 44 |              |          |                |     |     |     |            |       |       |  |
| 45 |              |          |                |     |     |     |            |       |       |  |
| 46 |              |          |                |     |     |     |            |       |       |  |



|    |               |         |                |     |     |       |            |       |      |  |
|----|---------------|---------|----------------|-----|-----|-------|------------|-------|------|--|
| 1  |               |         | longitudinal   |     |     |       |            |       |      |  |
| 2  |               |         | study          |     |     |       |            |       |      |  |
| 3  |               |         |                |     |     |       |            |       |      |  |
| 4  |               |         |                |     |     |       |            |       |      |  |
| 5  |               |         |                |     |     |       |            |       |      |  |
| 6  | Mikkola et    | Finland | cross-         | n/a | n/a | 848   | community- | 75-90 | 62.0 |  |
| 7  | al. (2015)    |         | sectional      |     |     |       | dwelling   |       |      |  |
| 8  |               |         | study          |     |     |       |            |       |      |  |
| 9  | Murabito et   | USA     | secondary      | n/a | n/a | 830   | community- | 79-88 | 61.4 |  |
| 10 | al. (2008)    |         | analysis of a  |     |     |       | dwelling   |       |      |  |
| 11 |               |         | prospective    |     |     |       |            |       |      |  |
| 12 |               |         | cohort study   |     |     |       |            |       |      |  |
| 13 |               |         |                |     |     |       |            |       |      |  |
| 14 | Muscari et    | Italy   | prospective,   | n/a | n/a | 500   | community- | 85-   | 65.8 |  |
| 15 | al. (2017)    |         | longitudinal   |     |     |       | dwelling   | 102   |      |  |
| 16 |               |         | population-    |     |     |       |            |       |      |  |
| 17 |               |         | based study    |     |     |       |            |       |      |  |
| 18 |               |         | with 7 years   |     |     |       |            |       |      |  |
| 19 |               |         | follow-up      |     |     |       |            |       |      |  |
| 20 |               |         |                |     |     |       |            |       |      |  |
| 21 | Nitsch et al. | UK      | cross-         | n/a | n/a | 2,967 | community- | ≥75   | 59.7 |  |
| 22 | (2011)        |         | sectional      |     |     |       | dwelling   |       |      |  |
| 23 |               |         | study          |     |     |       |            |       |      |  |
| 24 | Nykänen et    | Finland | population     | n/a | n/a | 696   | community- | ≥75   | 69.4 |  |
| 25 | al. (2013)    |         | based          |     |     |       | dwelling   |       |      |  |
| 26 |               |         | randomized     |     |     |       |            |       |      |  |
| 27 |               |         | comparative    |     |     |       |            |       |      |  |
| 28 |               |         | study          |     |     |       |            |       |      |  |
| 29 |               |         |                |     |     |       |            |       |      |  |
| 30 | Polku et al.  | Finland | prospective    | n/a | n/a | 848   | community- | 75-90 | 62.0 |  |
| 31 | (2015)        |         | cohort study   |     |     |       | dwelling   |       |      |  |
| 32 |               |         |                |     |     |       |            |       |      |  |
| 33 | Portegijs et  | Finland | secondary      | n/a | n/a | 753   | community- | 75-90 | 64.0 |  |
| 34 | al. (2016)    |         | analysis of a  |     |     |       | dwelling   |       |      |  |
| 35 |               |         | cross-         |     |     |       |            |       |      |  |
| 36 |               |         | sectional      |     |     |       |            |       |      |  |
| 37 |               |         | study          |     |     |       |            |       |      |  |
| 38 |               |         | (baseline data |     |     |       |            |       |      |  |
| 39 |               |         | & follow-up)   |     |     |       |            |       |      |  |
| 40 |               |         |                |     |     |       |            |       |      |  |
| 41 |               |         |                |     |     |       |            |       |      |  |
| 42 |               |         |                |     |     |       |            |       |      |  |
| 43 |               |         |                |     |     |       |            |       |      |  |
| 44 |               |         |                |     |     |       |            |       |      |  |
| 45 |               |         |                |     |     |       |            |       |      |  |
| 46 |               |         |                |     |     |       |            |       |      |  |

|    |               |         |                |                     |                        |             |                 |       |      |  |
|----|---------------|---------|----------------|---------------------|------------------------|-------------|-----------------|-------|------|--|
| 1  |               |         |                |                     |                        |             |                 |       |      |  |
| 2  |               |         |                |                     |                        |             |                 |       |      |  |
| 3  | Quail et al.  | Canada  | secondary      | n/a                 | n/a                    | 508         | community-      | 75-96 | 66.9 |  |
| 4  | (2007)        |         | analysis of a  |                     |                        |             | dwelling        |       |      |  |
| 5  |               |         | population-    |                     |                        |             |                 |       |      |  |
| 6  |               |         | based cohort   |                     |                        |             |                 |       |      |  |
| 7  |               |         | study          |                     |                        |             |                 |       |      |  |
| 8  |               |         |                |                     |                        |             |                 |       |      |  |
| 9  | Rantakokko    | Finland | secondary      | n/a                 | n/a                    | 847         | community-      | 75-90 | 62.0 |  |
| 10 | et al. (2014) |         | analysis of a  |                     |                        |             | dwelling        |       |      |  |
| 11 |               |         | cross-         |                     |                        |             |                 |       |      |  |
| 12 |               |         | sectional      |                     |                        |             |                 |       |      |  |
| 13 |               |         | study          |                     |                        |             |                 |       |      |  |
| 14 |               |         | (baseline      |                     |                        |             |                 |       |      |  |
| 15 |               |         | data)          |                     |                        |             |                 |       |      |  |
| 16 |               |         |                |                     |                        |             |                 |       |      |  |
| 17 | Rantakokko    | Finland | secondary      | n/a                 | n/a                    | 848         | community-      | 75-90 | 62.0 |  |
| 18 | et al. (2016) |         | analysis of a  |                     |                        | (baseline), | dwelling        |       |      |  |
| 19 |               |         | cross-         |                     |                        | 816         |                 |       |      |  |
| 20 |               |         | sectional      |                     |                        | (1 year     |                 |       |      |  |
| 21 |               |         | study          |                     |                        | follow-up), |                 |       |      |  |
| 22 |               |         | (baseline data |                     |                        | 761         |                 |       |      |  |
| 23 |               |         | & follow-up)   |                     |                        | (2 years    |                 |       |      |  |
| 24 |               |         |                |                     |                        | follow -up) |                 |       |      |  |
| 25 |               |         |                |                     |                        |             |                 |       |      |  |
| 26 | Rantz et al.  | USA     | secondary      | living with sensors | living without sensors | 133         | residents of    | mean  | 64.7 |  |
| 27 | (2015)        |         | analysis of a  |                     |                        |             | independent     | age:  |      |  |
| 28 |               |         | cross-         |                     |                        |             | living facility | 83    |      |  |
| 29 |               |         | sectional      |                     |                        |             |                 |       |      |  |
| 30 |               |         | study          |                     |                        |             |                 |       |      |  |
| 31 |               |         |                |                     |                        |             |                 |       |      |  |
| 32 | Rao et al.    | Canada  | secondary      | n/a                 | n/a                    | 1,668       | community-      | mean  | 58.0 |  |
| 33 | (2016)        |         | analysis of a  |                     |                        |             | dwelling        | age:  |      |  |
| 34 |               |         | cross-         |                     |                        |             |                 | 82.9  |      |  |
| 35 |               |         | sectional      |                     |                        |             |                 | (SD   |      |  |
| 36 |               |         | study          |                     |                        |             |                 | 6.9)  |      |  |
| 37 |               |         |                |                     |                        |             |                 |       |      |  |
| 38 | Rapo-Pylkko   | Finland | cross-         | n/a                 | n/a                    | 106         | community-      | 75-85 | 74.0 |  |
| 39 | et al. (2016) |         | sectional      |                     |                        |             | dwelling        |       |      |  |
| 40 |               |         | study          |                     |                        |             |                 |       |      |  |
| 41 |               |         |                |                     |                        |             |                 |       |      |  |
| 42 |               |         |                |                     |                        |             |                 |       |      |  |
| 43 |               |         |                |                     |                        |             |                 |       |      |  |
| 44 |               |         |                |                     |                        |             |                 |       |      |  |
| 45 |               |         |                |                     |                        |             |                 |       |      |  |
| 46 |               |         |                |                     |                        |             |                 |       |      |  |

1  
2  
3  
4  
5  
6  
7  
8  
9  
10  
11  
12  
13  
14  
15  
16  
17  
18  
19  
20  
21  
22  
23  
24  
25  
26  
27  
28  
29  
30  
31  
32  
33  
34  
35  
36  
37  
38  
39  
40  
41  
42  
43  
44  
45  
46

|                             |             |                                                                       |                                                                                                                                                                                                                                                                                                                                                   |                                                        |     |                    |       |      |
|-----------------------------|-------------|-----------------------------------------------------------------------|---------------------------------------------------------------------------------------------------------------------------------------------------------------------------------------------------------------------------------------------------------------------------------------------------------------------------------------------------|--------------------------------------------------------|-----|--------------------|-------|------|
| Rasinaho et al. (2006)      | Finland     | cross-sectional study                                                 | n/a                                                                                                                                                                                                                                                                                                                                               | n/a                                                    | 645 | community-dwelling | 75-81 | 74.3 |
| Richards & Rankaduwa (2008) | Canada      | cross-sectional study                                                 | n/a                                                                                                                                                                                                                                                                                                                                               | n/a                                                    | 722 | community-dwelling | ≥85   | N/A  |
| Rydwik et al. (2010)        | Sweden      | RCT 24 month follow-up                                                | 1) nutritional treatment (individual dietary counseling + 5 group sessions + general physical training advice)<br>2) physical training (regular physical group training of approx. 1h, twice a week for 12 weeks +general diet advice)<br>3) Training & nutrition (specific physical training & specific diet counseling/group session education) | general physical training advice & general diet advice | 96  | community-dwelling | ≥75   | 60.4 |
| Rydwik et al. (2008)        | Sweden      | RCT                                                                   | 1) nutrition (diet counseling/group session education + general physical training advice)<br>2) training (specific physical training + general diet advice)<br>3) Training & nutrition (specific physical training & specific diet counseling/group session education)                                                                            | general physical training advice & general diet advice | 96  | community-dwelling | ≥75   | 60.4 |
| Sabayan et al. (2012)       | Netherlands | population-based prospective follow-up study with cross-sectional and | n/a                                                                                                                                                                                                                                                                                                                                               | n/a                                                    | 572 | community-dwelling | ≥85   | 66.8 |

|    |               |          |                 |                                   |                              |        |                 |       |      |  |
|----|---------------|----------|-----------------|-----------------------------------|------------------------------|--------|-----------------|-------|------|--|
| 1  |               |          | longitudinal    |                                   |                              |        |                 |       |      |  |
| 2  |               |          | analyses        |                                   |                              |        |                 |       |      |  |
| 3  |               |          |                 |                                   |                              |        |                 |       |      |  |
| 4  |               |          |                 |                                   |                              |        |                 |       |      |  |
| 5  |               |          |                 |                                   |                              |        |                 |       |      |  |
| 6  | Sallinen et   | Finland  | qualitative     | n/a                               | n/a                          | 12     | residents of    | 80-92 | 75.0 |  |
| 7  | al. (2015)    |          | study using     |                                   |                              |        | service         |       |      |  |
| 8  |               |          | thematic        |                                   |                              |        | houses          |       |      |  |
| 9  |               |          | interviews and  |                                   |                              |        |                 |       |      |  |
| 10 |               |          | theory-driven   |                                   |                              |        |                 |       |      |  |
| 11 |               |          | content         |                                   |                              |        |                 |       |      |  |
| 12 |               |          | analysis        |                                   |                              |        |                 |       |      |  |
| 13 | Sampson et    | UK       | prospective     | n/a                               | n/a                          | 10,720 | community-      | ≥75   | 59.6 |  |
| 14 | al. (2009)    |          | cohort study    |                                   |                              |        | dwelling        |       |      |  |
| 15 |               |          |                 |                                   |                              |        |                 |       |      |  |
| 16 | Savikko et    | Finland  | cross-          | psychosocial group rehabilitation | not named (participants were | 117    | community-      | 75-92 | 74.0 |  |
| 17 | al. (2010)    |          | sectional       | intervention                      | not considered for analysis) |        | dwelling and    |       |      |  |
| 18 |               |          | study within    |                                   |                              |        | residents of    |       |      |  |
| 19 |               |          | an RCT          |                                   |                              |        | independent     |       |      |  |
| 20 |               |          |                 |                                   |                              |        | living facility |       |      |  |
| 21 |               |          |                 |                                   |                              |        |                 |       |      |  |
| 22 | Sixsmith et   | Hungary, | qualitative     | n/a                               | n/a                          | 190    | community-      | 75-89 | 61.6 |  |
| 23 | al. (2014)    | Latvia,  | study using in- |                                   |                              |        | dwelling        |       |      |  |
| 24 |               | United   | depth, semi-    |                                   |                              |        |                 |       |      |  |
| 25 |               | Kingdom, | structured      |                                   |                              |        |                 |       |      |  |
| 26 |               | Germany, | interviews and  |                                   |                              |        |                 |       |      |  |
| 27 |               | and      | grounded        |                                   |                              |        |                 |       |      |  |
| 28 |               | Sweden   | theory          |                                   |                              |        |                 |       |      |  |
| 29 | Thompson      | USA      | cross-          | n/a                               | n/a                          | 27     | inhabitants of  | 78-94 | 67.0 |  |
| 30 | et al. (2011) |          | sectional       |                                   |                              |        | an              |       |      |  |
| 31 |               |          | study           |                                   |                              |        | independent     |       |      |  |
| 32 |               |          |                 |                                   |                              |        | retirement      |       |      |  |
| 33 |               |          |                 |                                   |                              |        | community       |       |      |  |
| 34 |               |          |                 |                                   |                              |        |                 |       |      |  |
| 35 | Tsai et al.   | Finland  | cross-          | n/a                               | n/a                          | 174    | community-      | 75-90 | 64.0 |  |
| 36 | (2015)        |          | sectional       |                                   |                              |        | dwelling        |       |      |  |
| 37 |               |          | study           |                                   |                              |        |                 |       |      |  |
| 38 |               |          |                 |                                   |                              |        |                 |       |      |  |
| 39 | Tsai et al.   | Finland  | cross-          | n/a                               | n/a                          | 657    | community-      | 75-81 | 75.0 |  |
| 40 |               |          | sectional       |                                   |                              |        |                 |       |      |  |
| 41 |               |          |                 |                                   |                              |        |                 |       |      |  |
| 42 |               |          |                 |                                   |                              |        |                 |       |      |  |
| 43 |               |          |                 |                                   |                              |        |                 |       |      |  |
| 44 |               |          |                 |                                   |                              |        |                 |       |      |  |
| 45 |               |          |                 |                                   |                              |        |                 |       |      |  |
| 46 |               |          |                 |                                   |                              |        |                 |       |      |  |

1  
2  
3  
4  
5  
6  
7  
8  
9  
10  
11  
12  
13  
14  
15  
16  
17  
18  
19  
20  
21  
22  
23  
24  
25  
26  
27  
28  
29  
30  
31  
32  
33  
34  
35  
36  
37  
38  
39  
40  
41  
42  
43  
44  
45  
46

|                               |             |                                                                           |                                                                                                         |  |                          |                                       |                    |                          |       |
|-------------------------------|-------------|---------------------------------------------------------------------------|---------------------------------------------------------------------------------------------------------|--|--------------------------|---------------------------------------|--------------------|--------------------------|-------|
| (2013)                        |             |                                                                           | study                                                                                                   |  |                          |                                       | dwelling           |                          |       |
| van Bommel et al. (2010)      | Netherlands | prospective population-based study                                        | n/a                                                                                                     |  | n/a                      | 277                                   | community-dwelling | ≥85                      | 72.6  |
| van Houwelingen et al. (2015) | Netherlands | cluster RCT                                                               | care plan for people with a combination of problems at the functional, somatic, mental, or social level |  | usual care               | 2,681 (baseline)<br>2,172 (follow-up) | community-dwelling | ≥75                      | 68.3  |
| Vasara (2015)                 | Finland     | qualitative study using semi-structured storylines and narrative analysis | n/a                                                                                                     |  | n/a                      | 14                                    | community dwelling | 78-88                    | 64.3  |
| Vestergaard et al. (2008)     | Denmark     | RCT                                                                       | home-based video exercises; 26min/day; 3 times/week; 5 months; bi-weekly telephone call                 |  | bi-weekly telephone call | 53                                    | community-dwelling | 75-91                    | 100.0 |
| von Humboldt & Leal (2015)    | Portugal    | qualitative study using interviews and qualitative content analysis       | n/a                                                                                                     |  | n/a                      | 152                                   | community-dwelling | 75-102                   | 61.2  |
| Wang et al. (2017)            | Australia   | cross-sectional study                                                     | n/a                                                                                                     |  | n/a                      | 81                                    | community-dwelling | mean age: 83.8 (SD 3.83) | 44.4  |
| Werth et al. (2017)           | Australia   | retrospective cross-sectional                                             | n/a                                                                                                     |  | n/a                      | 239                                   | community-dwelling | ≥76                      | 60.7  |

|    |               |           |               |     |     |        |                  |       |      |  |
|----|---------------|-----------|---------------|-----|-----|--------|------------------|-------|------|--|
| 1  |               |           | survey study  |     |     |        |                  |       |      |  |
| 2  |               |           |               |     |     |        |                  |       |      |  |
| 3  |               |           |               |     |     |        |                  |       |      |  |
| 4  | Williams et   | Australia | cross-        | n/a | n/a | 546    | community-       | 75-96 | 68.0 |  |
| 5  | al. (2007)    |           | sectional     |     |     |        | dwelling         |       |      |  |
| 6  |               |           | study         |     |     |        |                  |       |      |  |
| 7  |               |           |               |     |     |        |                  |       |      |  |
| 8  | Wilson et al. | UK        | cross-        | n/a | n/a | 242    | community-       | 80-90 | 69.9 |  |
| 9  | (2007)        |           | sectional     |     |     |        | dwelling         |       |      |  |
| 10 |               |           | study         |     |     |        |                  |       |      |  |
| 11 |               |           |               |     |     |        |                  |       |      |  |
| 12 | Wong et al.   | Canada    | cross-        | n/a | n/a | 740    | community-       | 75-96 | 68.0 |  |
| 13 | (2010)        |           | sectional     |     |     |        | dwelling         |       |      |  |
| 14 |               |           | study         |     |     |        |                  |       |      |  |
| 15 | Young         | USA       | prospective   | n/a | n/a | 298    | people living    | 75-94 | 69.1 |  |
| 16 | (2009)        |           | cohort study  |     |     |        | in the           |       |      |  |
| 17 |               |           |               |     |     |        | independent      |       |      |  |
| 18 |               |           |               |     |     |        | living unit of a |       |      |  |
| 19 |               |           |               |     |     |        | continuing       |       |      |  |
| 20 |               |           |               |     |     |        | care             |       |      |  |
| 21 |               |           |               |     |     |        | retirement       |       |      |  |
| 22 |               |           |               |     |     |        | community        |       |      |  |
| 23 |               |           |               |     |     |        |                  |       |      |  |
| 24 | Zingmond et   | USA       | retrospective | n/a | n/a | 21,310 | community-       | ≥75   | 78.0 |  |
| 25 | al. (2011)    |           | cohort study  |     |     |        | dwelling         |       |      |  |
| 26 |               |           |               |     |     |        |                  |       |      |  |

27 Note. n/a = not applicable, N/A = not available

BMJ Open  
**Supplement**  
**PRISMA Checklist**

1  
2  
3  
4  
5  
6  
7  
8  
9  
10  
11  
12  
13  
14  
15  
16  
17  
18  
19  
20  
21  
22  
23  
24  
25  
26  
27  
28  
29  
30  
31  
32  
33  
34  
35  
36  
37  
38  
39  
40  
41  
42  
43  
44  
45  
46  
47

| Section/topic                      | #  | Checklist item                                                                                                                                                                                                                                                                                              | Reported on page # |
|------------------------------------|----|-------------------------------------------------------------------------------------------------------------------------------------------------------------------------------------------------------------------------------------------------------------------------------------------------------------|--------------------|
| <b>TITLE</b>                       |    |                                                                                                                                                                                                                                                                                                             |                    |
| Title                              | 1  | Identify the report as a systematic review, meta-analysis, or both.                                                                                                                                                                                                                                         | 1                  |
| <b>ABSTRACT</b>                    |    |                                                                                                                                                                                                                                                                                                             |                    |
| Structured summary                 | 2  | Provide a structured summary including, as applicable: background; objectives; data sources; study eligibility criteria, participants, and interventions; study appraisal and synthesis methods; results; limitations; conclusions and implications of key findings; systematic review registration number. | 1                  |
| <b>INTRODUCTION</b>                |    |                                                                                                                                                                                                                                                                                                             |                    |
| Rationale                          | 3  | Describe the rationale for the review in the context of what is already known.                                                                                                                                                                                                                              | 1-3                |
| Objectives                         | 4  | Provide an explicit statement of questions being addressed with reference to participants, interventions, comparisons, outcomes, and study design (PICOS).                                                                                                                                                  | 3                  |
| <b>METHODS</b>                     |    |                                                                                                                                                                                                                                                                                                             |                    |
| Protocol and registration          | 5  | Indicate if a review protocol exists, if and where it can be accessed (e.g., Web address), and, if available, provide registration information including registration number.                                                                                                                               | 4                  |
| Eligibility criteria               | 6  | Specify study characteristics (e.g., PICOS, length of follow-up) and report characteristics (e.g., years considered, language, publication status) used as criteria for eligibility, giving rationale.                                                                                                      | 4-5                |
| Information sources                | 7  | Describe all information sources (e.g., databases with dates of coverage, contact with study authors to identify additional studies) in the search and date last searched.                                                                                                                                  | 5                  |
| Search                             | 8  | Present full electronic search strategy for at least one database, including any limits used, such that it could be repeated.                                                                                                                                                                               | 5                  |
| Study selection                    | 9  | State the process for selecting studies (i.e., screening, eligibility, included in systematic review, and, if applicable, included in the meta-analysis).                                                                                                                                                   | 6                  |
| Data collection process            | 10 | Describe method of data extraction from reports (e.g., piloted forms, independently, in duplicate) and any processes for obtaining and confirming data from investigators.                                                                                                                                  | 6-7                |
| Data items                         | 11 | List and define all variables for which data were sought (e.g., PICOS, funding sources) and any assumptions and simplifications made.                                                                                                                                                                       | 6-7                |
| Risk of bias in individual studies | 12 | Describe methods used for assessing risk of bias of individual studies (including specification of whether this was done at the study or outcome level), and how this information is to be used in any data synthesis.                                                                                      | 6                  |
| Summary measures                   | 13 | State the principal summary measures (e.g., risk ratio, difference in means).                                                                                                                                                                                                                               | n/a                |
| Synthesis of results               | 14 | Describe the methods of handling data and combining results of studies, if done, including measures of consistency (e.g., $I^2$ ) for each meta-analysis.                                                                                                                                                   | 7-8                |
| Risk of bias across studies        | 15 | Specify any assessment of risk of bias that may affect the cumulative evidence (e.g., publication bias, selective reporting within studies).                                                                                                                                                                | n/a                |
| Additional analyses                | 16 | Describe methods of additional analyses (e.g., sensitivity or subgroup analyses, meta-regression), if done, indicating which were pre-specified.                                                                                                                                                            | n/a                |
| <b>RESULTS</b>                     |    |                                                                                                                                                                                                                                                                                                             |                    |
| Study selection                    | 17 | Give numbers of studies screened, assessed for eligibility, and included in the review, with reasons for exclusions at each stage, ideally with a flow diagram.                                                                                                                                             | 8 (Fig. 1)         |

|                                 |    |                                                                                                                                                                                                          |            |
|---------------------------------|----|----------------------------------------------------------------------------------------------------------------------------------------------------------------------------------------------------------|------------|
| Study characteristics           | 18 | For each study, present characteristics for which data were extracted (e.g., study size, PICOS, follow-up period) and provide the citations.                                                             | Appendix B |
| 1 Risk of bias within studies   | 19 | Present data on risk of bias of each study and, if available, any outcome level assessment (see item 12).                                                                                                | n/a        |
| 2 Results of individual studies | 20 | For all outcomes considered (benefits or harms), present, for each study: (a) simple summary data for each intervention group (b) effect estimates and confidence intervals, ideally with a forest plot. | n/a        |
| 3                               |    |                                                                                                                                                                                                          |            |
| 4 Synthesis of results          | 21 | Present results of each meta-analysis done, including confidence intervals and measures of consistency.                                                                                                  | 9-18       |
| 5 Risk of bias across studies   | 22 | Present results of any assessment of risk of bias across studies (see Item 15).                                                                                                                          | n/a        |
| 6 Additional analysis           | 23 | Give results of additional analyses, if done (e.g., sensitivity or subgroup analyses, meta-regression [see Item 16]).                                                                                    | n/a        |
| 7 <b>DISCUSSION</b>             |    |                                                                                                                                                                                                          |            |
| 8 Summary of evidence           | 24 | Summarize the main findings including the strength of evidence for each main outcome; consider their relevance to key groups (e.g., healthcare providers, users, and policy makers).                     | 18-20      |
| 9                               |    |                                                                                                                                                                                                          |            |
| 10 Limitations                  | 25 | Discuss limitations at study and outcome level (e.g., risk of bias), and at review-level (e.g., incomplete retrieval of identified research, reporting bias).                                            | 20-21      |
| 11                              |    |                                                                                                                                                                                                          |            |
| 12 Conclusions                  | 26 | Provide a general interpretation of the results in the context of other evidence, and implications for future research.                                                                                  | 21         |
| 13 <b>FUNDING</b>               |    |                                                                                                                                                                                                          |            |
| 14 Funding                      | 27 | Describe sources of funding for the systematic review and other support (e.g., supply of data); role of funders for the systematic review.                                                               | 22         |
| 15                              |    |                                                                                                                                                                                                          |            |

16 From: Moher D, Liberati A, Tetzlaff J, Altman DG, The PRISMA Group (2009). Preferred Reporting Items for Systematic Reviews and Meta-Analyses: The PRISMA Statement. PLoS Med 6(7): e1000097.  
 17 doi:10.1371/journal.pmed1000097

18

19

20

21

22

23

24

25

26

27

28

29

30

31

32

33

34

35

36

37

38

39

40

41

42

43

44

45

46

47



# BMJ Open

**Laying the foundation for a Core Set of the International Classification of Functioning, Disability and Health (ICF) for community-dwelling elderly adults in primary care: Relevant categories of their functioning from the research perspective. A scoping review**

|                                 |                                                                                                                                                                                                                                                                                                                                                                                                                                                                                                                                                                                                                                                                                                                                                                                                                                                                                                                                                                                                                                                     |
|---------------------------------|-----------------------------------------------------------------------------------------------------------------------------------------------------------------------------------------------------------------------------------------------------------------------------------------------------------------------------------------------------------------------------------------------------------------------------------------------------------------------------------------------------------------------------------------------------------------------------------------------------------------------------------------------------------------------------------------------------------------------------------------------------------------------------------------------------------------------------------------------------------------------------------------------------------------------------------------------------------------------------------------------------------------------------------------------------|
| Journal:                        | <i>BMJ Open</i>                                                                                                                                                                                                                                                                                                                                                                                                                                                                                                                                                                                                                                                                                                                                                                                                                                                                                                                                                                                                                                     |
| Manuscript ID                   | bmjopen-2020-037333.R1                                                                                                                                                                                                                                                                                                                                                                                                                                                                                                                                                                                                                                                                                                                                                                                                                                                                                                                                                                                                                              |
| Article Type:                   | Original research                                                                                                                                                                                                                                                                                                                                                                                                                                                                                                                                                                                                                                                                                                                                                                                                                                                                                                                                                                                                                                   |
| Date Submitted by the Author:   | 08-Jul-2020                                                                                                                                                                                                                                                                                                                                                                                                                                                                                                                                                                                                                                                                                                                                                                                                                                                                                                                                                                                                                                         |
| Complete List of Authors:       | Tomandl, Johanna; Friedrich-Alexander University Erlangen-Nuremberg, Institute of General Practice<br>Heinmüller, Stefan; Friedrich-Alexander University Erlangen-Nuremberg, Institute of General Practice<br>Selb, Melissa; ICF Research Branch, Swiss Paraplegic Research<br>Graessel, Elmar; Friedrich-Alexander University Erlangen-Nuremberg, Center for Health Services Research in Medicine, Department of Psychiatry and Psychotherapy<br>Freiberger, Ellen; Friedrich-Alexander University Erlangen-Nuremberg, Institute for Biomedicine of Aging<br>Kühlein, Thomas ; Friedrich-Alexander University Erlangen-Nuremberg, Institute of General Practice<br>Hueber, Susann; Friedrich-Alexander University Erlangen-Nuremberg, Institute of General Practice<br>Book, Stephanie; Friedrich-Alexander University Erlangen-Nuremberg, Center for Health Services Research in Medicine, Department of Psychiatry and Psychotherapy<br>Gothardt, Susann; Friedrich-Alexander University Erlangen-Nuremberg, Institute for Biomedicine of Ageing |
| <b>Primary Subject Heading</b>: | Geriatric medicine                                                                                                                                                                                                                                                                                                                                                                                                                                                                                                                                                                                                                                                                                                                                                                                                                                                                                                                                                                                                                                  |
| Secondary Subject Heading:      | General practice / Family practice                                                                                                                                                                                                                                                                                                                                                                                                                                                                                                                                                                                                                                                                                                                                                                                                                                                                                                                                                                                                                  |
| Keywords:                       | GENERAL MEDICINE (see Internal Medicine), GERIATRIC MEDICINE, PRIMARY CARE                                                                                                                                                                                                                                                                                                                                                                                                                                                                                                                                                                                                                                                                                                                                                                                                                                                                                                                                                                          |
|                                 |                                                                                                                                                                                                                                                                                                                                                                                                                                                                                                                                                                                                                                                                                                                                                                                                                                                                                                                                                                                                                                                     |

SCHOLARONE™  
Manuscripts



I, the Submitting Author has the right to grant and does grant on behalf of all authors of the Work (as defined in the below author licence), an exclusive licence and/or a non-exclusive licence for contributions from authors who are: i) UK Crown employees; ii) where BMJ has agreed a CC-BY licence shall apply, and/or iii) in accordance with the terms applicable for US Federal Government officers or employees acting as part of their official duties; on a worldwide, perpetual, irrevocable, royalty-free basis to BMJ Publishing Group Ltd ("BMJ") its licensees and where the relevant Journal is co-owned by BMJ to the co-owners of the Journal, to publish the Work in this journal and any other BMJ products and to exploit all rights, as set out in our [licence](#).

The Submitting Author accepts and understands that any supply made under these terms is made by BMJ to the Submitting Author unless you are acting as an employee on behalf of your employer or a postgraduate student of an affiliated institution which is paying any applicable article publishing charge ("APC") for Open Access articles. Where the Submitting Author wishes to make the Work available on an Open Access basis (and intends to pay the relevant APC), the terms of reuse of such Open Access shall be governed by a Creative Commons licence – details of these licences and which [Creative Commons](#) licence will apply to this Work are set out in our licence referred to above.

Other than as permitted in any relevant BMJ Author's Self Archiving Policies, I confirm this Work has not been accepted for publication elsewhere, is not being considered for publication elsewhere and does not duplicate material already published. I confirm all authors consent to publication of this Work and authorise the granting of this licence.

1  
2  
3 **Laying the foundation for a Core Set of the International Classification of Functioning,**  
4 **Disability and Health (ICF) for community-dwelling elderly adults in primary care:**  
5 **Relevant categories of their functioning from the research perspective. A scoping**  
6 **review**  
7  
8  
9

10  
11  
12 Johanna Tomandl (0000-0001-5571-421X)<sup>a</sup>

13  
14 Stefan Heinmüller (0000-0002-7997-7871)<sup>a</sup>

15  
16 Melissa Selb<sup>b</sup>

17  
18 Elmar Graessel<sup>c</sup>

19  
20 Ellen Freiburger<sup>d</sup>

21  
22 Thomas Kühlein<sup>a</sup>

23  
24 Susann Hueber<sup>a</sup>

25  
26 Stephanie Book(0000-0002-7120-4022)<sup>c\*</sup>

27  
28 Susann Gotthardt<sup>d\*</sup>

29  
30 \* SB and SG contributed equally to this work.

31  
32  
33  
34  
35 <sup>a</sup> Friedrich-Alexander-Universität Erlangen-Nürnberg (FAU), Institute of General Practice,  
36 Universitätsstraße 29, 91054 Erlangen, Germany

37  
38 <sup>b</sup> ICF Research Branch, a cooperation partner within the WHO Collaborating Center for the  
39 Family of International Classifications in Germany (at DIMDI), Nottwil, Switzerland / Swiss  
40 Paraplegic Research, Nottwil, Switzerland

41  
42 <sup>c</sup> Center for Health Services Research in Medicine, Department of Psychiatry and  
43 Psychotherapy, Friedrich-Alexander-Universität Erlangen-Nürnberg (FAU), Schwabachanlage  
44 10, 91054 Erlangen, Germany

45  
46 <sup>d</sup> Friedrich-Alexander-Universität Erlangen-Nürnberg (FAU), Institute for Biomedicine of Aging,  
47 Kobergerstraße 60, 90408 Nuremberg, Germany

48  
49 **Corresponding Author:**

50 Johanna Tomandl  
51 Friedrich-Alexander-Universität Erlangen-Nürnberg (FAU)  
52 Institute of General Practice  
53 Universitätsstraße 29, 91054 Erlangen, Germany  
54 E-Mail: [johanna.tomandl@gmail.com](mailto:johanna.tomandl@gmail.com)  
55 Tel.: 004991318545761

56  
57  
58 **Word count:** 4.193

59  
60 **Abstract**

1  
2  
3 **Objectives:** The objective of this study was to find relevant concepts of functioning in  
4 community-dwelling older adults within frequently used assessment instruments published in  
5 the scientific literature. This was part of a larger project to develop an International  
6 Classification of Functioning, Disability and Health (ICF) Core Set for use in primary care.  
7  
8

9  
10  
11  
12 **Design:** A scoping review was conducted. Articles dealing with functioning in the elderly were  
13 searched and assessed for eligibility. The study population included community-dwelling older  
14 adults ( $\geq 75$  years) without dementia, living in high-resources countries. Relevant concepts  
15 were extracted from assessment instruments and linked to the ICF. Finally, a frequency  
16 analysis was conducted.  
17  
18

19  
20  
21  
22 **Setting:** Home, primary care.  
23

24  
25  
26 **Participants:** Community-dwelling adults aged 75 years and above.  
27

28  
29 **Results:** From 5,060 identified publications 82 were included and 30 assessment instruments  
30 extracted. Overall, 1,182 concepts were retrieved. Most were linked to the 'activities and  
31 participation' component. The most frequently identified categories were '*memory functions*',  
32 '*dressing*', and '*changing basic body position*'.  
33  
34  
35  
36

37  
38 **Conclusions:** This review provides a list of relevant ICF categories from the research  
39 perspective that will be used for developing an ICF Core Set for older primary care patients.  
40  
41

42  
43 **Trial registration number:** PROSPERO (CRD42017067784), *Versorgungsforschung*  
44 *Deutschland Datenbank* [VfD\_17\_003833] and *clinicaltrials.gov* [NCT03384732].  
45  
46

47  
48 **Keywords:** International Classification of Functioning, Disability and Health, community-  
49 dwelling older adults, geriatric health services, primary care  
50  
51

## 52 53 54 55 **1 Article Summary**

### 56 57 58 **1.1 Strengths and limitations**

- 59  
60 - A broad literature search was performed in five key medical and social databases.

- This review encompassed a broad spectrum of studies, including mainly cross-sectional and longitudinal studies as well as randomized controlled trials, but also two qualitative and one mixed method study.
- The researchers involved in this study were from different disciplines, allowing for an interdisciplinary perspective on the topic.
- Restricting the search to articles published in English or German in specific high-resources countries and drawing a random sample for full text screening carries the risk of losing potentially relevant publications.
- Excluding studies that focus solely on body structures may have introduced some bias in the results.

## 2 Introduction

The increasing average life expectancy is accompanied by an increasing prevalence of chronic diseases(1, 2). A blurring between the boundaries of diseases, risk factors and physiological aging processes can be observed(3, 4). In general practices in Germany the prevalence of multimorbidity in patients over the age of 60 is around 85%(5). Multimorbidity is a mostly disease-based concept, which is mainly being responded to pharmaceutically. The prevalence of polypharmacy in general practices in Germany is around 37%(5). Inappropriate polypharmacy can lead to adverse drug events, increased risk for fractures, hospitalization, or even death(6, 7) To address this issue of inappropriate polypharmacy, there is a need for new strategies (e. g. functioning information in the consultation) that consider the complexity of health in older adults. With increasing age, problems in functioning become a strong predictor of mortality and provide important information about the consequences of chronic conditions(8, 9). Making aware of these functioning problems might help shift the medical gaze towards problems and answers more rooted in the patients' lived experience of health, ultimately helping to better balance medical decisions. As general practitioners are the primary contact for community-dwelling patients, they could play an important role in advancing the paradigm change.

1  
2  
3 *Functioning* can be defined as the product of the interaction between a person's intrinsic  
4 capacity and his/her environment. It can be described using the International Classification of  
5 Functioning, Disability and Health (ICF). With more than 1,400 categories, it is, however, too  
6 extensive to be used in daily practice. Thus, shorter lists of categories, so-called ICF Core Sets  
7 (ICF-CS), have been developed for several health conditions.<sup>1</sup> They comprise categories  
8 relevant to persons living with a specific condition(10). An ICF-CS for geriatric patients in early  
9 post-acute rehabilitation was developed in 2005(11). As target group and aims of rehabilitation  
10 can differ from that of general medicine, the categories included in this ICF-CS may likewise  
11 be different from an ICF-CS for geriatric patients in primary care. Two other ICF-CS, one for  
12 primary care and one for geriatric patients, have been developed in the Netherlands(12-14).  
13 Though they might turn out to be applicable to our study population, they were developed using  
14 methods other than the established multi-perspective methodology for developing ICF-CS,  
15 leaving out either the perspective of community-dwelling elderly or researchers. For this  
16 reason, we aimed to develop an ICF-CS for community-dwelling adults ( $\geq 75$  years) for use in  
17 primary care, following the standardized process(10). This process includes a preparatory  
18 phase followed by a consensus conference. During the preparatory phase, four studies are  
19 conducted to identify relevant ICF categories: a systematic or scoping review (research  
20 perspective), a qualitative study (perspective of the target population)(15), an expert survey  
21 (experts' perspective), and an empirical study (clinical perspective)(16). To gain a  
22 comprehensive understanding of functioning, it is important to capture all four perspectives.  
23  
24  
25  
26  
27  
28  
29  
30  
31  
32  
33  
34  
35  
36  
37  
38  
39  
40  
41  
42  
43  
44  
45

46 In this paper, methods and results of the scoping review are presented. The objective was to  
47 identify aspects of functioning in community-dwelling elderly adults considered relevant in  
48 frequently used assessment instruments published in the scientific literature.  
49  
50  
51

### 52 **3 Methods**

53  
54  
55  
56 This scoping review was conducted following the methodology proposed by the ICF Research  
57 Branch(10).<sup>2</sup> This methodology is composed of five steps: 1) literature search, 2) study  
58 selection, 3) extraction of relevant concepts, 4) linkage of the concepts to the ICF and 5)  
59  
60

1  
2  
3 frequency analysis. We did not aim to answer clinical questions by reviewing existing evidence,  
4 but to systematically extract the concepts used by the scientific community to operationalize  
5 functioning related to community-dwelling older adults. A study protocol has been published  
6 elsewhere(17). This review was registered in PROSPERO (CRD42017067784) on 07/10/2017  
7 and is reported according to the Preferred Reporting Items for Systematic Reviews and Meta-  
8 Analyses extension for scoping reviews (PRISMA-ScR) guideline(18).  
9  
10  
11  
12  
13  
14

### 15 16 **3.1 Eligibility Criteria**

17  
18 The selection of the eligibility criteria was guided by the PICOS (Population, Intervention,  
19 Comparison, Outcomes, Study design) framework(19). Due to the special focus of this review,  
20 only the 'P', 'O', and 'S' were relevant for our search.  
21  
22

23  
24 Population: For a publication to be included in this review, all the participants included in the  
25 published study had to be community-dwelling and at least 75 years old. Studies that included  
26 institutionalized participants (e.g. nursing home), participants recruited in a hospital or  
27 rehabilitation center, or participants with dementia were excluded. As the intended ICF-CS is  
28 meant to be used in primary care practices in Germany, only studies conducted in high-  
29 resources countries with a similar socio-economic and cultural background were considered.  
30 Consequently, only studies conducted in the member states of the European Union and the  
31 European Free Trade Association, the United States, Australia and New Zealand were  
32 included. Moreover, to get a representative picture of the health reality of old adults, studies  
33 with participants suffering from only one specific health condition were excluded, as they might  
34 have very specific needs.  
35  
36  
37  
38  
39  
40  
41  
42  
43  
44  
45  
46  
47

48  
49 Outcomes: The publications had to be related to functioning as defined by the ICF (e.g.  
50 activities of daily living, social interaction, physical mobility). Publications reporting on studies  
51 that solely focused on body structures without considering any other features of functioning  
52 were excluded. Since physicians tend to focus on physical aspects of health anyway, and the  
53 final ICF-CS is meant to complement this traditional emphasis on physical structures and  
54 processes with few categories as necessary (for reasons of feasibility), we decided to forego  
55  
56  
57  
58  
59  
60

1  
2  
3 body structures to ensure that the resulting ICF-CS reflects those components of the ICF that  
4 are not yet in the focus of general physicians.  
5

6  
7 Study design: As suggested in the ICF-CS development guidelines, randomized controlled  
8 trials, clinical controlled trials, cross-sectional studies, observational studies and qualitative  
9 studies were included(10). Study protocols, case studies, economic evaluation studies,  
10 conference papers, psychometric studies, prevention studies, studies of phase-II clinical trials,  
11 studies exclusively showing laboratory parameters, animal experiments, letters, comments  
12 and editorials were excluded, as those publications usually do not include relevant information  
13 on functioning(10). Furthermore, systematic reviews and meta-analyses were not included in  
14 this review.  
15  
16  
17  
18  
19  
20  
21  
22  
23

### 24 **3.2 Literature search**

25  
26 Electronic searches were carried out in PubMed, PsycINFO, EMBASE, CINAHL und Scopus  
27 to identify potentially relevant publications. The search terms were organized into population  
28 (e.g. aged, elderly, older adults), living condition (e.g. community-dwelling, independently  
29 living) and outcome variables according to the ICF-related terms (e.g. social life, self-care,  
30 home environment) using the thesaurus of the respective database (e.g. Medical subject  
31 headings in PubMed) as well as free text words. Only studies published between 2007 and  
32 2017 in peer-reviewed journals in English or German were considered for inclusion. The search  
33 strategy was reviewed by an experienced librarian. The whole search strategy is available in  
34 Appendix A.  
35  
36  
37  
38  
39  
40  
41  
42  
43  
44  
45

### 46 **3.3 Study selection**

47  
48 The publications found in the databases were exported to a review manager (Covidence). After  
49 removing duplicates, five researchers (JT/SHe/SG/SB/EF) performed a title and abstract  
50 screening based on the predefined eligibility criteria. Title and abstract of each publication were  
51 screened by two researchers independently. As an overwhelming number of publications were  
52 identified for the full text screening, a random sample was drawn to ensure manageability. As  
53 the purpose of this review was not to answer clinical questions by evaluating existing evidence,  
54  
55  
56  
57  
58  
59  
60



1  
2  
3 but only to systematically identify relevant concepts of functioning, drawing a random sample  
4 was possible. This procedure has already been applied in previous ICF-CS development  
5 projects(20-23) and is also recommended in the guidelines(10). It was decided that a random  
6 sample, containing 50% of all publications, should be included for full text screening. The  
7  
8 random sample was drawn using the Random Integer Set Generator(24). The full texts were  
9  
10 screened by four independent researchers (one half by JT and SHe and the other half by SG  
11  
12 and SB) based on the predefined inclusion and exclusion criteria. Results were compared and  
13  
14 any disagreement was solved in discussion with all four researchers.  
15  
16  
17  
18  
19

### 20 21 **3.4 Assessment of study quality**

22  
23 As the purpose of this review was to systematically identify relevant concepts of functioning  
24 and not to assess the effectiveness of certain interventions, a quality assessment of the studies  
25 was considered unnecessary. Nevertheless, only studies that were published in peer-reviewed  
26 scientific journals were included for analysis. Thus, the publications have assumingly  
27 undergone a level of quality control.  
28  
29  
30  
31  
32  
33

### 34 35 **3.5 Data extraction**

36 Following the PICOS scheme, the following data were extracted from the publications:

- 37 - Population: age, gender, sample size, type of sample (e.g. community-dwelling or  
38 residents of independent living facilities)
- 39 - Intervention (if applicable)
- 40 - Control (if applicable)
- 41 - Outcomes: concepts identified in the article text; instruments for assessing functioning
- 42 - Study design

43  
44  
45  
46  
47  
48  
49  
50  
51  
52  
53 Other data extracted were author, title, year and country. "A concept was defined as a single  
54 health aspect or a personal (internal) or environmental (external) factor with an impact on  
55 health. Formally, a concept could consist of a single word or a set of words"(25). Examples for  
56 concepts are living arrangements, social embeddedness or walking. Assessment instruments  
57  
58  
59  
60

1  
2  
3 were defined as any kind of standardized outcome measure (e.g. questionnaires, clinical tests)  
4 used in the study. The extraction process led to two different data sets: 1) assessment  
5 instruments and 2) concepts extracted from the article text. The first data set is more objective  
6 as the assessment instruments provide a standardized and systematic basis for further  
7 analysis, whereas the second data set is more subjective. Because of this and based on the  
8 methodology applied in other ICF-CS development projects, it was decided to focus only on  
9 the first data set(26-29). Disagreement between the two researchers regarding the extracted  
10 data was solved by discussion. When consensus between the two could not be reached, a  
11 third researcher was consulted.

### 22 **3.6 Data synthesis**

23  
24 Assessment instruments that were not available in the respective publication were accessed  
25 either through the internet or by contacting the authors of the included publications. Following  
26 the method of other ICF-CS development projects, only assessment instruments used in at  
27 least two different studies were considered(30, 31). The items and response options of each  
28 assessment instrument were listed on one table. Subsequently, meaningful concepts  
29 contained within each item or response option were extracted. The concepts were linked to  
30 ICF categories by four independent researchers (one half by JT and SHe and the other half  
31 by SG and SB) using established linking rules(32). When consensus between the two  
32 researchers was not reached, a third researcher was consulted. If an ICF category was  
33 assigned repeatedly in an assessment instrument, it was counted only once. However, when  
34 a publication reported on a study that used multiple instruments and a specific category was  
35 identified in more than one of these instruments, this particular category was counted  
36 according to the number of instruments to which it was linked. Therefore, the maximum count  
37 of one category can exceed the number of identified studies included in the review. We used  
38 descriptive statistics to report the most frequently identified ICF categories.  
39  
40 Only first-level and second-level ICF categories are reported in this paper.<sup>3</sup> If a concept was  
41 linked to a third- or fourth-level ICF category, the overarching second-level category was  
42  
43  
44  
45  
46  
47  
48  
49  
50  
51  
52  
53  
54  
55  
56  
57  
58  
59  
60

1  
2  
3 included for analysis. Due to the hierarchical nature of the ICF, a lower-level category shares  
4 the attributes of the higher-level category of which it is a member(33).  
5  
6  
7

### 8 **3.7 Patient and public involvement**

9  
10 Patients and the public were not involved in this study.  
11  
12

## 13 **4 Results**

### 14 **4.1 Study Selection**

15  
16 A total of 10,043 publications were identified. After removing duplicates, 5,060 potentially  
17 relevant publications were left. In the abstract screening 681 articles were identified for full-text  
18 screening. Of these, a random sample of 341 articles (50%) was drawn for the full text  
19 screening, from which 82 articles were subsequently included for data extraction (see figure  
20 1). The references of the included studies are available in Appendix B and the study  
21 characteristics are provided in Appendix C.  
22  
23  
24  
25  
26  
27  
28  
29  
30

31 Please insert figure 1 here  
32  
33

### 34 **4.2 Study characteristics**

35  
36 The 82 included studies were conducted in 17 different countries. About 20% of the studies  
37 were conducted in Finland (n = 16), 14.6% in Sweden (n = 12) and 12.2% in the United States  
38 (n = 10). The investigated study population consisted of 74,351 community-dwelling elderly, of  
39 whom 68.6% were female. Three publications did not provide information about the gender of  
40 their participants. Most of the studies (65.9%) had an observational design (longitudinal or  
41 cross sectional), 15.6% were qualitative studies, 12.2% intervention studies, 4.9% analyzed  
42 secondary data and one study (1.2%) used mixed methods.  
43  
44  
45  
46  
47  
48  
49  
50  
51

### 52 **4.3 Linking Results**

53  
54 From the 82 included publications 111 assessment instruments were identified. Out of these,  
55 30 were identified in at least two of the publications and were included for data extraction (table  
56 1).  
57  
58  
59  
60

Table 1

*Frequency of use and thematic focus of the included assessment instruments.*

| Assessment instrument<br>(study references: see App. B)                                                                                  | Nr. of studies | Cognition | Mobility | Functioning<br>status | Environmental<br>factors | Health conditions |
|------------------------------------------------------------------------------------------------------------------------------------------|----------------|-----------|----------|-----------------------|--------------------------|-------------------|
| Mini Mental State Examination (MMSE)<br>(1, 3, 5, 8, 10, 12, 18, 21, 22, 28, 45, 46, 50, 51, 52, 54, 55, 56, 58, 63, 65, 66, 71, 72, 74) | 25             | x         |          |                       |                          |                   |
| Geriatric Depression Scale - 15 items<br>(1, 8, 10, 28, 41, 50, 56, 57, 65, 71, 72, 78, 79)                                              | 13             |           |          |                       |                          | x                 |
| Lawton Instrumental Activities of Daily Living Scale<br>(6, 8, 15, 21, 22, 38, 39, 40, 48, 50, 57, 68)                                   | 12             |           |          | x                     |                          |                   |
| Katz Index of Independence in Activities of Daily Living<br>(10, 12, 38, 39, 40, 47, 48, 68, 81)                                         | 9              |           |          | x                     |                          |                   |
| Timed up and go<br>(1, 6, 15, 17, 23, 33, 62)                                                                                            | 7              |           | x        |                       |                          |                   |
| Short Physical Performance Battery<br>(18, 28, 32, 35, 36, 43, 55)                                                                       | 7              |           | x        |                       |                          |                   |
| Activities of Daily Living staircase<br>(24, 25, 27, 34, 41, 79)                                                                         | 6              |           |          | x                     |                          |                   |
| Short Form Health 36<br>(11, 17, 19, 23, 31)                                                                                             | 5              |           |          | x                     |                          |                   |
| Geriatric Depression Scale - 30 items<br>(6, 38, 39, 40, 81)                                                                             | 5              |           |          |                       |                          | x                 |
| Barthel Index of Activities of Daily Living<br>(6, 15, 21, 22, 50)                                                                       | 5              |           |          | x                     |                          |                   |
| Center for Epidemiologic Studies Depression Scale<br>(18, 32, 44, 47, 70)                                                                | 5              |           |          |                       |                          | x                 |
| The University of Alabama at Birmingham Study of Aging Life-Space Assessment<br>(10, 18, 51, 69)                                         | 4              |           |          |                       | x                        |                   |
| EuroQoL-5 dimension<br>(30, 48, 72, 74)                                                                                                  | 4              |           |          | x                     |                          |                   |
| Berg Balance Scale<br>(1, 5, 25)                                                                                                         | 3              |           | x        |                       |                          |                   |
| Groningen Activity Restrictions Scale<br>(63, 71, 72)                                                                                    | 3              |           |          | x                     |                          |                   |
| Abbreviated Mental Test Score<br>(38, 39, 40)                                                                                            | 3              | x         |          |                       |                          |                   |
| Minimum Data Set - Home Care<br>(35, 36, 43)                                                                                             | 3              | x         | x        | x                     | x                        | x                 |
| Mobility-Tiredness-Scale<br>(5, 44, 74)                                                                                                  | 3              |           |          |                       |                          |                   |
| Usability in my Home Questionnaire<br>(34, 41, 79)                                                                                       | 3              |           |          |                       | x                        |                   |

|    |                                                                                                               |   |   |   |   |
|----|---------------------------------------------------------------------------------------------------------------|---|---|---|---|
| 1  |                                                                                                               |   |   |   |   |
| 2  |                                                                                                               |   |   |   |   |
| 3  |                                                                                                               |   |   |   |   |
| 4  | Perceived environmental barriers to outdoor mobility<br>(54, 55)                                              | 2 |   |   | x |
| 5  |                                                                                                               |   |   |   |   |
| 6  | Cognitive Performance Scale<br>(35, 43)                                                                       | 2 | x |   |   |
| 7  |                                                                                                               |   |   |   |   |
| 8  | Functional Independence Measure<br>(61, 62)                                                                   | 2 |   | x | x |
| 9  |                                                                                                               |   |   |   |   |
| 10 | Gait Speed<br>(2, 15)                                                                                         | 2 |   | x |   |
| 11 |                                                                                                               |   |   |   |   |
| 12 | Gijón Social Scale<br>(15, 22)                                                                                | 2 |   |   | x |
| 13 |                                                                                                               |   |   |   |   |
| 14 | Housing Enabler Screening Tool<br>(34, 41)                                                                    | 2 |   |   | x |
| 15 |                                                                                                               |   |   |   |   |
| 16 | Housing Options for Older People<br>(41, 79)                                                                  | 2 |   |   | x |
| 17 |                                                                                                               |   |   |   |   |
| 18 | Impact on Participation and Autonomy Questionnaire<br>(46, 54)                                                | 2 |   | x | x |
| 19 |                                                                                                               |   |   |   |   |
| 20 | Instrumental Activity Measure<br>(61, 62)                                                                     | 2 |   |   | x |
| 21 |                                                                                                               |   |   |   |   |
| 22 | Mini Nutritional Assessment<br>(21, 22)                                                                       | 2 |   | x | x |
| 23 |                                                                                                               |   |   |   |   |
| 24 | Neuropsychological Aging Inventory<br>(34, 67)                                                                | 2 |   |   | x |
| 25 |                                                                                                               |   |   |   |   |
| 26 |                                                                                                               |   |   |   |   |
| 27 |                                                                                                               |   |   |   |   |
| 28 |                                                                                                               |   |   |   |   |
| 29 | <i>Note.</i> The numbers in brackets refer to the studies (see Appendix B), in which the instrument was used. |   |   |   |   |
| 30 |                                                                                                               |   |   |   |   |
| 31 |                                                                                                               |   |   |   |   |
| 32 | The most frequently used assessment instrument was the Mini Mental State Examination                          |   |   |   |   |
| 33 | (MMSE), which was reported in 25 articles (31.3%). From the selected assessment                               |   |   |   |   |
| 34 | instruments 1,182 concepts were extracted. Out of these, 24 concepts were linked to first-level               |   |   |   |   |
| 35 | ICF categories, 1,066 to second-level categories and 48 multidimensional concepts to two or                   |   |   |   |   |
| 36 | more ICF categories. Forty-four concepts could not be assigned to a specific ICF category.                    |   |   |   |   |
| 37 |                                                                                                               |   |   |   |   |
| 38 | The 1,066 concepts were assigned to 87 different second-level ICF categories (see table 2).                   |   |   |   |   |
| 39 | Of these, 41 (47.1%) are related to 'activities and participation', 24 (27.6%) categories refer to            |   |   |   |   |
| 40 | 'body functions', 20 (23.0%) to 'environmental factors' and two (2.3%) belong to 'body                        |   |   |   |   |
| 41 | structures'. Mentioned 53 times, the category <i>memory functions (b144)</i> was the most                     |   |   |   |   |
| 42 | frequently identified category. Within the 'activities and participation' component, the category             |   |   |   |   |
| 43 | <i>dressings (d540)</i> and within the 'environmental factors' component, <i>products or substances for</i>   |   |   |   |   |
| 44 | <i>personal consumption (e110)</i> were identified most often. The two extracted ICF categories for           |   |   |   |   |
| 45 | 'body structures' were <i>structure of upper extremity (s730)</i> and <i>structure of lower extremity</i>     |   |   |   |   |
| 46 |                                                                                                               |   |   |   |   |
| 47 |                                                                                                               |   |   |   |   |
| 48 |                                                                                                               |   |   |   |   |
| 49 |                                                                                                               |   |   |   |   |
| 50 |                                                                                                               |   |   |   |   |
| 51 |                                                                                                               |   |   |   |   |
| 52 |                                                                                                               |   |   |   |   |
| 53 |                                                                                                               |   |   |   |   |
| 54 |                                                                                                               |   |   |   |   |
| 55 |                                                                                                               |   |   |   |   |
| 56 |                                                                                                               |   |   |   |   |
| 57 |                                                                                                               |   |   |   |   |
| 58 |                                                                                                               |   |   |   |   |
| 59 |                                                                                                               |   |   |   |   |
| 60 |                                                                                                               |   |   |   |   |

*Note.* The numbers in brackets refer to the studies (see Appendix B), in which the instrument was used.

The most frequently used assessment instrument was the Mini Mental State Examination (MMSE), which was reported in 25 articles (31.3%). From the selected assessment instruments 1,182 concepts were extracted. Out of these, 24 concepts were linked to first-level ICF categories, 1,066 to second-level categories and 48 multidimensional concepts to two or more ICF categories. Forty-four concepts could not be assigned to a specific ICF category.

The 1,066 concepts were assigned to 87 different second-level ICF categories (see table 2). Of these, 41 (47.1%) are related to 'activities and participation', 24 (27.6%) categories refer to 'body functions', 20 (23.0%) to 'environmental factors' and two (2.3%) belong to 'body structures'. Mentioned 53 times, the category *memory functions (b144)* was the most frequently identified category. Within the 'activities and participation' component, the category *dressings (d540)* and within the 'environmental factors' component, *products or substances for personal consumption (e110)* were identified most often. The two extracted ICF categories for 'body structures' were *structure of upper extremity (s730)* and *structure of lower extremity*

(s750). All 87 ICF categories will serve as candidates for consideration for inclusion in the final ICF-CS during the consensus conference.

Table 2

*Frequency of second-level ICF categories linked to concepts identified in the assessment instruments.*

| ICF code                            | ICF category                                    | Count      |
|-------------------------------------|-------------------------------------------------|------------|
| <b>Activities and participation</b> |                                                 | <b>612</b> |
| d177                                | Making decisions                                | 9          |
| d166                                | Reading                                         | 2          |
| d170                                | Writing                                         | 2          |
| d210                                | Undertaking a single task                       | 28         |
| d230                                | Carrying out daily routine                      | 9          |
| d240                                | Handling stress and other psychological demands | 7          |
| d360                                | Using communication devices and techniques      | 17         |
| d410                                | Changing basic body position                    | 39         |
| d450                                | Walking                                         | 36         |
| d470                                | Using transportation                            | 25         |
| d455                                | Moving around                                   | 24         |
| d460                                | Moving around in different locations            | 21         |
| d475                                | Driving                                         | 17         |
| d420                                | Transferring oneself                            | 15         |
| d430                                | Lifting and carrying objects                    | 8          |
| d445                                | Hand and arm use                                | 5          |
| d415                                | Maintaining a body position                     | 3          |
| d465                                | Moving around using equipment                   | 2          |
| d540                                | Dressing                                        | 41         |
| d510                                | Washing oneself                                 | 39         |
| d550                                | Eating                                          | 36         |
| d530                                | Toileting                                       | 30         |
| d520                                | Caring for body parts                           | 13         |
| d560                                | Drinking                                        | 11         |
| d570                                | Looking after one's health                      | 5          |
| d640                                | Doing housework                                 | 37         |
| d630                                | Preparing meals                                 | 28         |

1  
2  
3  
4  
5  
6  
7  
8  
9  
10  
11  
12  
13  
14  
15  
16  
17  
18  
19  
20  
21  
22  
23  
24  
25  
26  
27  
28  
29  
30  
31  
32  
33  
34  
35  
36  
37  
38  
39  
40  
41  
42  
43  
44  
45  
46  
47  
48  
49  
50  
51  
52  
53  
54  
55  
56  
57  
58  
59  
60

|                       |                                        |            |
|-----------------------|----------------------------------------|------------|
| d620                  | Acquisition of goods and service       | 28         |
| d650                  | Caring for household objects           | 6          |
| d660                  | Assisting others                       | 2          |
| d750                  | Informal social relationships          | 4          |
| d710                  | Basic interpersonal interactions       | 2          |
| d720                  | Complex interpersonal interactions     | 2          |
| d760                  | Family relationships                   | 2          |
| d770                  | Intimate relationships                 | 2          |
| d870                  | Economic self-sufficiency              | 17         |
| d850                  | Remunerative employment                | 7          |
| d860                  | Basic economic transactions            | 2          |
| d920                  | Recreation and leisure                 | 19         |
| d910                  | Community life                         | 5          |
| d930                  | Religion and spirituality              | 5          |
| <b>Body functions</b> |                                        | <b>359</b> |
| b144                  | Memory functions                       | 53         |
| b114                  | Orientation functions                  | 35         |
| b140                  | Attention functions                    | 35         |
| b152                  | Emotional functions                    | 35         |
| b167                  | Mental functions of language           | 30         |
| b130                  | Energy and drive functions             | 28         |
| b126                  | Temperament and personality functions  | 23         |
| b110                  | Consciousness functions                | 5          |
| b134                  | Sleep functions                        | 5          |
| b160                  | Thought functions                      | 5          |
| b147                  | Psychomotor functions                  | 3          |
| b172                  | Calculation functions                  | 3          |
| b280                  | Sensation of pain                      | 12         |
| b210                  | Seeing functions                       | 3          |
| b230                  | Hearing functions                      | 3          |
| b330                  | Fluency and rhythm of speech functions | 5          |
| b525                  | Defecation functions                   | 19         |
| b510                  | Ingestion functions                    | 3          |
| b530                  | Weight maintenance functions           | 3          |

|    |                              |                                                                                        |           |
|----|------------------------------|----------------------------------------------------------------------------------------|-----------|
| 1  |                              |                                                                                        |           |
| 2  |                              |                                                                                        |           |
| 3  | b620                         | Urination functions                                                                    | 25        |
| 4  |                              |                                                                                        |           |
| 5  | b755                         | Involuntary movement reaction functions                                                | 13        |
| 6  |                              |                                                                                        |           |
| 7  | b730                         | Muscle power functions                                                                 | 7         |
| 8  |                              |                                                                                        |           |
| 8  | b810                         | Protective functions of the skin                                                       | 3         |
| 9  |                              |                                                                                        |           |
| 10 | b820                         | Repair functions of the skin                                                           | 3         |
| 11 |                              |                                                                                        |           |
| 12 | <b>Body structures</b>       |                                                                                        | <b>4</b>  |
| 13 | s750                         | Structure of lower extremity                                                           | 2         |
| 14 |                              |                                                                                        |           |
| 15 | s730                         | Structure of upper extremity                                                           | 2         |
| 16 |                              |                                                                                        |           |
| 17 | <b>Environmental factors</b> |                                                                                        | <b>91</b> |
| 18 | e110                         | Products or substances for personal consumption                                        | 17        |
| 19 |                              |                                                                                        |           |
| 20 | e155                         | Design, construction and building products and technology of buildings for private use | 12        |
| 21 |                              |                                                                                        |           |
| 22 | e115                         | Products and technology for personal use in daily living                               | 5         |
| 23 |                              |                                                                                        |           |
| 23 | e120                         | Products and technology for personal indoor and outdoor mobility and transportation    | 4         |
| 24 |                              |                                                                                        |           |
| 25 | e125                         | Products and technology for communication                                              | 2         |
| 26 |                              |                                                                                        |           |
| 27 | e160                         | Products and technology of land development                                            | 2         |
| 28 |                              |                                                                                        |           |
| 29 | e165                         | Assets                                                                                 | 2         |
| 30 |                              |                                                                                        |           |
| 30 | e210                         | Physical geography                                                                     | 2         |
| 31 |                              |                                                                                        |           |
| 32 | e225                         | Climate                                                                                | 2         |
| 33 |                              |                                                                                        |           |
| 34 | e240                         | Light                                                                                  | 2         |
| 35 |                              |                                                                                        |           |
| 35 | e250                         | Sound                                                                                  | 2         |
| 36 |                              |                                                                                        |           |
| 37 | e310                         | Immediate family                                                                       | 5         |
| 38 |                              |                                                                                        |           |
| 39 | e315                         | Extended family                                                                        | 5         |
| 40 |                              |                                                                                        |           |
| 41 | e320                         | Friends                                                                                | 5         |
| 42 |                              |                                                                                        |           |
| 42 | e325                         | Acquaintances, peers colleagues, neighbors and community members                       | 5         |
| 43 |                              |                                                                                        |           |
| 44 | e355                         | Health professionals                                                                   | 3         |
| 45 |                              |                                                                                        |           |
| 46 | e575                         | General social support services, systems and policies                                  | 5         |
| 47 |                              |                                                                                        |           |
| 48 | e580                         | Health services, systems and policies                                                  | 5         |
| 49 |                              |                                                                                        |           |
| 49 | e530                         | Utilities services, systems and policies                                               | 4         |
| 50 |                              |                                                                                        |           |
| 51 | e520                         | Open space planning services, systems and policies                                     | 2         |
| 52 |                              |                                                                                        |           |
| 53 | e530                         | Utilities services, systems and policies                                               | 4         |
| 54 |                              |                                                                                        |           |
| 54 | e520                         | Open space planning services, systems and policies                                     | 2         |

---

*Note.* d: activities and participation, b: body functions, s: body structures, e: environmental factors



The assigned first-level categories can be seen in table 3. Forty-eight extracted concepts were not linkable to only one ICF category. For these concepts, two or more categories were chosen for each concept (table 4).

Table 3

*Frequency of first-level ICF categories linked to concepts identified in the assessment instruments.*

| ICF Codes | ICF category                                 | Count |
|-----------|----------------------------------------------|-------|
| e3        | Support and relationships                    | 9     |
| d7        | Interpersonal interactions and relationships | 5     |
| d3        | Communication                                | 2     |
| d4        | Mobility                                     | 2     |
| d5        | Self-care                                    | 2     |
| d6        | Domestic life                                | 2     |
| d8        | Major life areas                             | 2     |

*Note.* e: environmental factors, d: activities & participation

Table 4

*Frequency of combinations of ICF categories linked to concepts identified in the assessment instruments.*

| ICF codes          | Description                                 | Count |
|--------------------|---------------------------------------------|-------|
| b152, b1266        | Feeling worthless                           | 18    |
| b130, b1264        | Openness for new experiences                | 18    |
| b1470, d720, b1521 | Changes in behavior symptoms                | 3     |
| b152, b130         | Indicators of depression, anxiety, sad mood | 3     |
| b1641, d230, d177  | Cognitive skills for daily decision-making  | 3     |
| b755, b2402, b152  | Fear of falling                             | 3     |

*Note.* b: body functions, d: activities & participation

Out of the 44 concepts, which could not be assigned to a specific ICF category, 30 (68.2%) were characterized as 'not definable' (nd), implying that the concept belonged to the universe of the ICF, but a decision about the most precise ICF category could not be made as the concepts were too broad to be linked to one specific ICF category or a combination of ICF categories(32). Nine (20.5%) concepts referred to 'personal factors' (pf) and five (11.4%) were 'health conditions' (coded as 'not covered-health condition', nc-hc). The 'nd' concepts included

1  
2  
3 general health (n = 14), physical health (n = 5), physical activity (n = 3), activities of daily living  
4 (n = 3) and other (n = 5). Concepts linked to 'personal factors' included living arrangements,  
5 self-sufficiency and medication adherence.<sup>4</sup> The commonly reported health conditions  
6 according to organ systems were diseases of the skin and subcutaneous tissue, psychiatric  
7 disorders, neurological diseases, infectious diseases, diseases of the digestive system,  
8 sensory disorders, diseases of the musculoskeletal system, and cancer.  
9  
10  
11  
12  
13  
14

## 15 16 **5 Discussion**

17  
18  
19 As part of the project to develop an ICF-CS for community-dwelling adults  $\geq 75$  years old for  
20 use in primary care, this scoping review was performed to identify aspects of functioning that  
21 are considered relevant in frequently used assessment instruments published in the scientific  
22 literature. From the research perspective, the component 'activities and participation' has  
23 shown to be the most relevant among all ICF components with regard to functioning of older  
24 patients. Almost half of all assigned categories are in this component. ICF categories that  
25 belong to the components 'body functions' and 'environmental factors', were less frequently  
26 assigned. With only two ICF categories, 'body structures' seems to be the least relevant  
27 component of the four. However, this might be due to the fact that studies which solely focused  
28 on body structures without considering any other features of functioning were excluded. Such  
29 studies were excluded to help ensure that the resulting ICF-CS goes beyond the biological  
30 aspects of health provision and promotes those components of the ICF that might not yet  
31 receive enough attention in primary care. It is noteworthy that the ICF-CS for primary care and  
32 for the geriatric population developed by the research groups in the Netherlands also did not  
33 include body structures(12-14).  
34  
35  
36  
37  
38  
39  
40  
41  
42  
43  
44  
45  
46  
47  
48  
49

50  
51 The ICF chapters with the most frequently assigned categories were: b1 'mental functions', d4  
52 'mobility', d5 'self-care', and d6 'domestic life'. These areas are of special interest as they are  
53 prerequisites for being able to live independently at home. In a meta-analysis, indicators of  
54 functional and cognitive impairments were identified as the strongest predictors for  
55 necessitating admission to a nursing home(34). Cognitive impairment has also been identified  
56  
57  
58  
59  
60

1  
2  
3 as the strongest predictor for necessitating nursing home placement in a study investigating  
4 caregivers reasons for nursing home placement(35). Frequently identified categories referring  
5 to d5 'self-care' were *dressing (d540)*, *washing oneself (d510)*, *eating (d550)*, and *toileting*  
6 *(d530)*. These are all activities of daily living. Literature indicates, that older adults with  
7 problems in three or more activities of daily living had a higher risk of being admitted to a  
8 nursing home than adults without problems(34). Household activities, like *doing housework*  
9 *(d640)* or *preparing meals (d630)*, have frequently been identified in this review, but have not  
10 been found to be a major predictor for nursing home placement(34). This might be due to the  
11 fact that impairments in these areas can easily be compensated e.g. with household aids or  
12 assistance from family members.

13  
14 No concepts were identified referring to the chapter b4 'functions of the cardiovascular,  
15 hematological, immunological and respiratory systems'. This might be due to the fact, that  
16 health conditions are coded with 'nc-hc' and not with the ICF category representing the  
17 underlying functions affected by a certain disease. Another explanation might be that, although  
18 the prevalence of diseases in these systems, especially of cardiovascular diseases, has  
19 increased since the 1980s, inability to perform activities of daily living as well as mortality  
20 induced by these diseases has decreased in the same period(2). This might be an explanation  
21 why recent research that focuses on functioning of the elderly, as reflected by the publications  
22 from 2007-2017, is less concerned with functions of the cardiovascular, hematological,  
23 immunological and respiratory systems. Moreover, no concepts were identified in the chapter  
24 e4 'attitudes'. Attitudes may be more in the focus of qualitative research, which, due to the  
25 focus on assessment instruments in this study, did barely show up within this data set.  
26 However, as several studies and systematic reviews suggest that negative attitudes towards  
27 old age negatively affect the health of the elderly, attitudes might be a relevant aspect to also  
28 include in instruments used for assessing functioning(36-38).

29  
30 Concepts referring to environmental factors with an impact on an individual's life were  
31 minimally addressed in the assessment instruments reported in the included articles. The most  
32 frequently identified category in this section was *products or substances for personal*

1  
2  
3 *consumption (e110)*, mainly assigned for the concept of medication. However, environmental  
4 factors like housing design (e.g. lighting conditions, uneven surfaces), neighborhood planning  
5 (e.g. public transportation, walkable community services), and social support (e.g. family,  
6 friends, or health professionals) play a crucial role in old age. Considering these environmental  
7 factors can contribute to the prevention of falls, nursing home placement as well as to the  
8 compensation of other negative effects of age-related declines(34, 39-41). Thus, developing  
9 instruments that addresses these essential environmental factors or revising current  
10 assessment instruments to include more environmental factors items may be warranted.

### 21 **5.1 Strengths and limitations**

22 There are several strengths and limitations of this scoping review. A broad literature review  
23 was performed using a systematic search strategy in five key medical and social databases.  
24 One strength is its interdisciplinary nature. The researchers who developed the search strategy  
25 and conducted the study selection, data extraction and linking are from different disciplines  
26 (e.g. psychology, sports science, medicine), allowing for an interdisciplinary perspective on the  
27 topic. Furthermore, this review encompassed a broad spectrum of studies, including cross-  
28 sectional and longitudinal studies as well as randomized controlled trials.

29 A limitation of this literature review is the restriction to articles published in English or. Thus,  
30 relevant studies conducted in the selected countries, but published in the authors' native  
31 language were possibly missed. Also drawing a random sample for full text screening carries  
32 the risk of losing potentially relevant publications. Finally, excluding studies that focus solely  
33 on body structures may have introduced some bias in the results. The reason for excluding  
34 these studies was mentioned above.

35 Some potentially relevant information may have been lost in the linking process. While the ICF  
36 is too extensive to be used in daily practice, especially in a primary care setting, single ICF  
37 categories are often not precise enough to represent some relevant concepts for older adults.  
38 For example, fatigue, falls or fear of falling could not easily be linked to one specific ICF  
39 category. Sometimes more than one category was necessary to be able to describe these  
40 concepts; e.g. fear of falling was linked using *involuntary movement reaction functions (b755)*,

1  
2  
3 *sensation of falling (b2402)*, and *emotional functions (b152)*. Other concepts could only be  
4  
5 linked to the very general first-level ICF categories, not allowing a detailed representation of  
6  
7 the concept; e.g. isolation was linked to *support and relationships (e3)*. Sometimes, the same  
8  
9 concept could be linked to different categories. This was especially the case for concepts  
10  
11 regarding the change of body positions. For example the concept “get into bed” can be linked  
12  
13 to:

- 14  
15
- 16 - *lying down (d4100)*; defined as “Getting into and out of a lying down position or  
17 *changing body position from horizontal to any other position, such as standing up or*  
18 *sitting down”(33) or to*
  - 19  
20 - *standing (d4104)*; defined as “Getting into and out of a standing position or changing  
21 *body position from standing to any other position, such as lying down or sitting*  
22 *down”(33).*
- 23  
24  
25  
26  
27

28 This was one reason why we decided to link all concepts to second-level categories only. Being  
29  
30 aware of these issues, WHO created a mechanism of updating ICF categories to further  
31  
32 enhance the use of this classification(42). We will report the linking problems we faced to WHO  
33  
34 after publication of this study.

## 35 36 37 **5.2 Implications for practice**

38  
39 Within a consensus conference a comprehensive ICF-CS based on the results of this scoping  
40  
41 review and the three other preparatory studies, and also considering the already existing ICF-  
42  
43 CS for this target group mentioned in the introduction, will be developed.

44  
45  
46 As discussed, several aspects of functioning that were identified in this review are closely  
47  
48 linked to independent living. There is some evidence that older patients tend to consider  
49  
50 problems in functioning that threaten their independent living as most important, whereas their  
51  
52 physicians focus more on somatic problems and risk factors(43). Thus, in order to better  
53  
54 balance medical interventions according to the older patients' needs, it might be warranted to  
55  
56 include more psychosocial and environmental information in the consultation process(44).  
57  
58 Providing physicians with our comprehensive, but easy to handle ICF-CS might be a first step  
59  
60

1  
2  
3 towards achieving this. Considering information on functioning might support general  
4 practitioners to better estimate the relevance of medical interventions, and thus avoid  
5 unnecessary medical interventions.  
6  
7  
8  
9

## 10 **6 Conclusions**

11  
12  
13 In conclusion, this scoping review demonstrates that frequently used instruments for assessing  
14 functioning in older adults focus mainly on activities of daily living and mental functions,  
15 whereas environmental factors are only minimally addressed. Despite some limitations  
16 experienced in the linking process, the ICF provides a useful reference to identify and cluster  
17 the concepts used in instruments for assessing functioning of older adults.  
18  
19  
20  
21  
22  
23

## 24 **7 Acknowledgements**

25  
26  
27 We would like to thank Volker Müller from the university library of the Friedrich-Alexander-  
28 Universität Erlangen Nürnberg for his support and advice in the development of the electronic  
29 search strategy.  
30  
31  
32  
33

34  
35 The present work was performed in partial fulfilment of the requirements for obtaining the  
36 degree 'Dr. rer. biol. hum.' for Johanna Tomandl.  
37  
38  
39

## 40 **8 Footnotes**

### 41 **8.1 Contributors**

42  
43  
44  
45 JT was involved in the development of the search strategy; performed the literature search;  
46 took part in the screening of the papers, the data extraction and the linking process; performed  
47 the data analysis; was involved in the interpretation of the data; drafted parts of the manuscript  
48 and collated all sections from the co-authors. SHe was involved in the development of the  
49 search strategy, the screening of the papers, the data extraction, the linking process and the  
50 interpretation of the data. MS advised the research team on the ICF Core Set methodology  
51 and revised the draft. EF was involved in the conception of the study, the development of the  
52 search strategy and the abstract screening; provided supervision and revised the draft.  
53  
54  
55  
56  
57  
58  
59  
60

1  
2  
3 EG/TK/SHu were involved in the conception of the study and in the development of the search  
4 strategy; provided supervision and revised the draft. SB/SG were involved in the development  
5 of the search strategy, the screening of the papers, the data extraction, the linking process and  
6 the interpretation of the data; drafted parts of the manuscript. All authors read and approved  
7 the final version of the manuscript. SB and SG contributed equally to this work.  
8  
9  
10  
11  
12

## 13 14 **8.2 Funding**

15  
16 This work was supported by the German Federal Ministry of Education and Research grant  
17 number 01GY1605.  
18  
19

## 20 21 **8.3 Disclaimer**

22  
23 The funders had no role in the study design, data collection and analysis, decision to publish,  
24 or preparation of the manuscript.  
25  
26

## 27 28 **8.4 Competing interests**

29  
30 None declared.  
31

## 32 33 **8.5 Patient consent for publication**

34  
35 Not required.  
36

## 37 38 **8.6 Ethics approval**

39  
40 Not required.  
41

## 42 43 **8.7 Data availability statement**

44  
45 The datasets used and analyzed during the current study are available from the corresponding  
46 author upon reasonable request.  
47  
48

## 49 50 **8.8 Notes**

51  
52 <sup>1</sup> A list of accredited ICF-CS can be found here: <https://www.icf-core-sets.org/en/page1.php>.<sup>2</sup>  
53  
54 The ICF Research Branch is a cooperation partner within the WHO collaborating center for  
55 the Family of International Classifications (WHO-FIC) in Germany, which aims to promote  
56 health by implementing ICF based tools and models.<sup>3</sup> The categories of the ICF are divided  
57 into different levels. First-level categories are coded using the component letter (b, s, d, or e)  
58  
59  
60

1  
2  
3 followed by the chapter number (one digit). Second-level categories are coded using the  
4  
5 letter and three digits; the third- and fourth-level categories using the letter and four or five  
6  
7 digits. <sup>4</sup>In the International Classification of Functioning, Disability and Health personal  
8  
9 factors are defined as factors related to the individual (e.g. age, gender, life experiences)  
10  
11 whereas environmental factors cover all aspects of the external world that have an impact on  
12  
13 functioning (e.g. social systems or laws).  
14  
15

## 16 9 References

- 17 1. Christensen K, Doblhammer G, Rau R, et al. Ageing populations: the challenges  
18 ahead. *Lancet*. 2009;374(9696):1196-208.10.1016/S0140-6736(09)61460-4.
- 19 2. Crimmins EM. Trends in the health of the elderly. *Annu Rev Public Health*.  
20 2004;25:79-98.
- 21 3. Klawiter M. Risk, prevention and the breast cancer continuum: the NCI, the FDA,  
22 health activism and the pharmaceutical industry. *History and Technology*.  
23 2002;18(4):309-53.
- 24 4. Aronowitz RA. The converged experience of risk and disease. *The Milbank Quarterly*.  
25 2009;87(2):417-42.
- 26 5. Kostev K, Jacob L. Multimorbidity and polypharmacy among elderly people followed  
27 in general practices in Germany. *European journal of internal medicine*. 2018;55:66-  
28 8.10.1016/j.ejim.2018.07.014.
- 29 6. Frazier SC. Health outcomes and polypharmacy in elderly individuals. *J Gerontol*  
30 *Nurs*. 2005;31(9):4-9.
- 31 7. Calderón-Larrañaga A, Poblador-Plou B, González-Rubio F, et al. Multimorbidity,  
32 polypharmacy, referrals, and adverse drug events: are we doing things well? *Br J*  
33 *Gen Pract*. 2012;62(605):e821-e6.10.3399/bjgp12X659295.
- 34 8. Chatterji S, Byles J, Cutler D, et al. Health, functioning, and disability in older adults -  
35 present status and future implications. *Lancet*. 2015;385(9967):563-75.
- 36 9. Lee SJ, Go AS, Lindquist K, et al. Chronic conditions and mortality among the oldest  
37 old. *Am J Public Health*. 2008;98(7):1209-14.10.2105/Ajph.2007.130955.
- 38 10. Selb M, Escorpizo R, Kostanjsek N, et al. A guide on how to develop an International  
39 Classification of Functioning, Disability and Health Core Set. *European Journal of*  
40 *Physical and Rehabilitation Medicine*. 2015;51(1):105-17.
- 41 11. Grill E, Hermes R, Swoboda W, et al. ICF Core Set for geriatric patients in early post-  
42 acute rehabilitation facilities. *Disabil Rehabil*. 2005;27(7-8):411-  
43 7.10.1080/09638280400013966.
- 44 12. Emmen B, van Boven K, ten Napel H. Exploration of the desired content of an  
45 'International Classification of Functioning' (ICF) item set for multimorbid patients in  
46 general practice. *Newsletter WHO-FIC Annual Network Meeting*. 2014;12(1):9-11.
- 47 13. Postma S, van Boven K, Ten Napel H, et al. The development of an ICF-based  
48 questionnaire for patients with chronic conditions in primary care. *J Clin Epidemiol*.  
49 2018;103:92-100.
- 50 14. Spoorenberg SLW, Reijneveld SA, Middel B, et al. The Geriatric ICF Core Set  
51 reflecting health-related problems in community-living older adults aged 75 years and  
52 older without dementia: development and validation. *Disabil Rehabil*.  
53 2015;37(25):2337-43.10.3109/09638288.2015.1024337.
- 54 15. Tomandl J, Book S, Hoefle A, et al. Laying the foundation for an ICF core set for  
55 community-dwelling elderly adults in primary care: the patient-perspective identified in  
56 a qualitative study. 2020. Manuscript submitted for publication.
- 57  
58  
59  
60



16. Book S, Ulbrecht G, Tomandl J, et al. Laying the foundation for an ICF Core Set for community-dwelling elderly adults in primary care: The clinical perspective identified in a cross-sectional study. 2020. Manuscript submitted for publication.
17. Tomandl J, Book S, Gotthardt S, et al. Laying the foundation for a core set of the International Classification of Functioning, Disability and Health for community-dwelling adults aged 75 years and above in general practice: a study protocol. *BMJ Open*. 2018;8(8):e024274.10.1136/bmjopen-2018-024274.
18. Tricco AC, Lillie E, Zarin W, et al. PRISMA extension for scoping reviews (PRISMA-ScR): checklist and explanation. *Ann Intern Med*. 2018;169(7):467-73.
19. Tacconelli E. Systematic reviews: CRD's guidance for undertaking reviews in health care. *The Lancet Infectious Diseases*. 2010;10(4):226.
20. Geyh S, Cieza A, Schouten J, et al. ICF Core Sets for stroke. *J Rehabil Med*. 2004;36(0):135-41.
21. de Schipper E, Lundequist A, Coghill D, et al. Ability and disability in autism spectrum disorder: A systematic literature review employing the international classification of functioning, disability and health-children and youth version. *Autism Res*. 2015;8(6):782-94.
22. Granberg S, Dahlström J, Möller C, et al. The ICF core sets for hearing loss—researcher perspective. Part I: Systematic review of outcome measures identified in audiological research. *Int J Audio*. 2014;53(2):65-76.
23. Gorostiaga A, Balluerka N, Guilera G, et al. Functioning in patients with schizophrenia: a systematic review of the literature using the International Classification of Functioning, Disability and Health (ICF) as a reference. *Qual Life Res*. 2017;26(3):531-43.
24. Random Integer Set Generator 2018. Available from: <https://www.random.org/integer-sets/>. (Accessed 20 Dec 2018).
25. Offenbächer M, Cieza A, Brockow T, et al. Are the contents of treatment outcomes in fibromyalgia trials represented in the international classification of functioning, disability, and health? *Clin J Pain*. 2007;23(8):691-701.
26. Wolff B, Cieza A, Parentin A, et al. Identifying the concepts contained in outcome measures of clinical trials on four internal disorders using the International Classification of Functioning, Disability and Health as a reference. *J Rehabil Med*. 2004(44 Suppl):37-42.10.1080/16501960410015407.
27. Wasiak J, McMahon M, Danilla S, et al. Measuring common outcome measures and their concepts using the International Classification of Functioning, Disability and Health (ICF) in adults with burn injury: a systematic review. *Burns*. 2011;37(6):913-24.
28. Brockow T, Cieza A, Kuhlow H, et al. Identifying the concepts contained in outcome measures of clinical trials on musculoskeletal disorders and chronic widespread pain using the International Classification of Functioning, Disability and Health as a reference. *J Rehabil Med*. 2004;36(0):30-6.
29. Geyh S, Kurt T, Brockow T, et al. Identifying the concepts contained in outcome measures of clinical trials on stroke using the International Classification of Functioning, Disability and Health as a reference. *J Rehabil Med*. 2004;36(0):56-62.
30. Scheuringer M, Grill E, Boldt C, et al. Systematic review of measures and their concepts used in published studies focusing on rehabilitation in the acute hospital and in early post-acute rehabilitation facilities. *Disabil Rehabil*. 2005;27(7-8):419-29.
31. Bartoszek G, Fischer U, Müller M, et al. Outcome measures in older persons with acquired joint contractures: a systematic review and content analysis using the ICF (International Classification of Functioning, Disability and Health) as a reference. *BMC Geriatr*. 2016;16(1):40.
32. Cieza A, Fayed N, Bickenbach J, et al. Refinements of the ICF Linking Rules to strengthen their potential for establishing comparability of health information. *Disabil Rehabil*. 2016;41(5):574-83.10.3109/09638288.2016.1145258.
33. World Health Organization. International Classification of Functioning, Disability and Health: ICF: World Health Organization 2001.

- 1  
2  
3 34. Gaugler JE, Duval S, Anderson KA, et al. Predicting nursing home admission in the  
4 US: a meta-analysis. *BMC Geriatr*. 2007;7(1):13.10.1186/1471-2318-7-13.  
5 35. Buhr GT, Kuchibhatla M, Clipp EC. Caregivers' reasons for nursing home placement:  
6 clues for improving discussions with families prior to the transition. *Gerontologist*.  
7 2006;46(1):52-61.  
8 36. Horton S, Baker J, Pearce G, et al. On the malleability of performance: Implications  
9 for seniors. *J Appl Gerontol*. 2008;27(4):446-65.  
10 37. Meisner BA. A meta-analysis of positive and negative age stereotype priming effects  
11 on behavior among older adults. *Journals of Gerontology Series B: Psychological*  
12 *Sciences and Social Sciences*. 2011;67(1):13-7.  
13 38. Levy BR, Slade MD, Chang ES, et al. Ageism Amplifies Cost and Prevalence of  
14 Health Conditions. *Gerontologist*. 2018:gny131-gny.10.1093/geront/gny131.  
15 39. Lawton MP. Residential environment and self-directedness among older people. *Am*  
16 *Psychol*. 1990;45(5):638.  
17 40. Lien WC, Chang JH, Guo NW, et al. Determinants of perceived physical environment  
18 barriers among community-dwelling elderly in Taiwan. *J Nutr Health Aging*.  
19 2015;19(5):575-82.10.1007/s12603-015-0473-4.  
20 41. Wahl H-W, Iwarsson S, Oswald F. Aging well and the environment: Toward an  
21 integrative model and research agenda for the future. *Gerontologist*. 2012;52(3):306-  
22 16.  
23 42. WHO-FIC Update and Revision Committee. ICF Update Platform. User Guide. 2013.  
24 43. Theile G, Mueller C. [Multimorbid General Practice Patients - What's really  
25 important?]. *Praxis*. 2012;101:1621-6.10.1024/1661-8157/a001145.  
26 44. Nationale Akademie der Wissenschaften Leopoldina aDAdT, Union der deutschen  
27 Akademien der Wissenschaften. Medizinische Versorgung im Alter – Welche Evidenz  
28 brauchen wir? 2015.  
29  
30

## 31 10 List of abbreviations

32  
33  
34 ICF: International Classification of Functioning, Disability and Health

35 ICF-CS: International Classification of Functioning, Disability and Health Core Set

36  
37 PRISMA-Sc: Preferred Reporting Items for Systematic Reviews and Meta-Analyses extension  
38 for scoping reviews

39  
40  
41 PICOS: Patients, Intervention, Comparison, Outcomes, Study design  
42  
43  
44  
45

## 46 11 List of figures

47  
48  
49 *Figure 1.* Preferred Reporting Items for Systematic Reviews and Meta-Analyses (PRISMA)  
50 flow chart.  
51  
52  
53  
54  
55  
56  
57  
58  
59  
60

1  
2  
3  
4  
5  
6  
7  
8  
9  
10  
11  
12  
13  
14  
15  
16  
17  
18  
19  
20  
21  
22  
23  
24  
25  
26  
27  
28  
29  
30  
31  
32  
33  
34  
35  
36  
37  
38  
39  
40  
41  
42  
43  
44  
45  
46  
47  
48  
49  
50  
51  
52  
53  
54  
55  
56  
57  
58  
59  
60

For peer review only

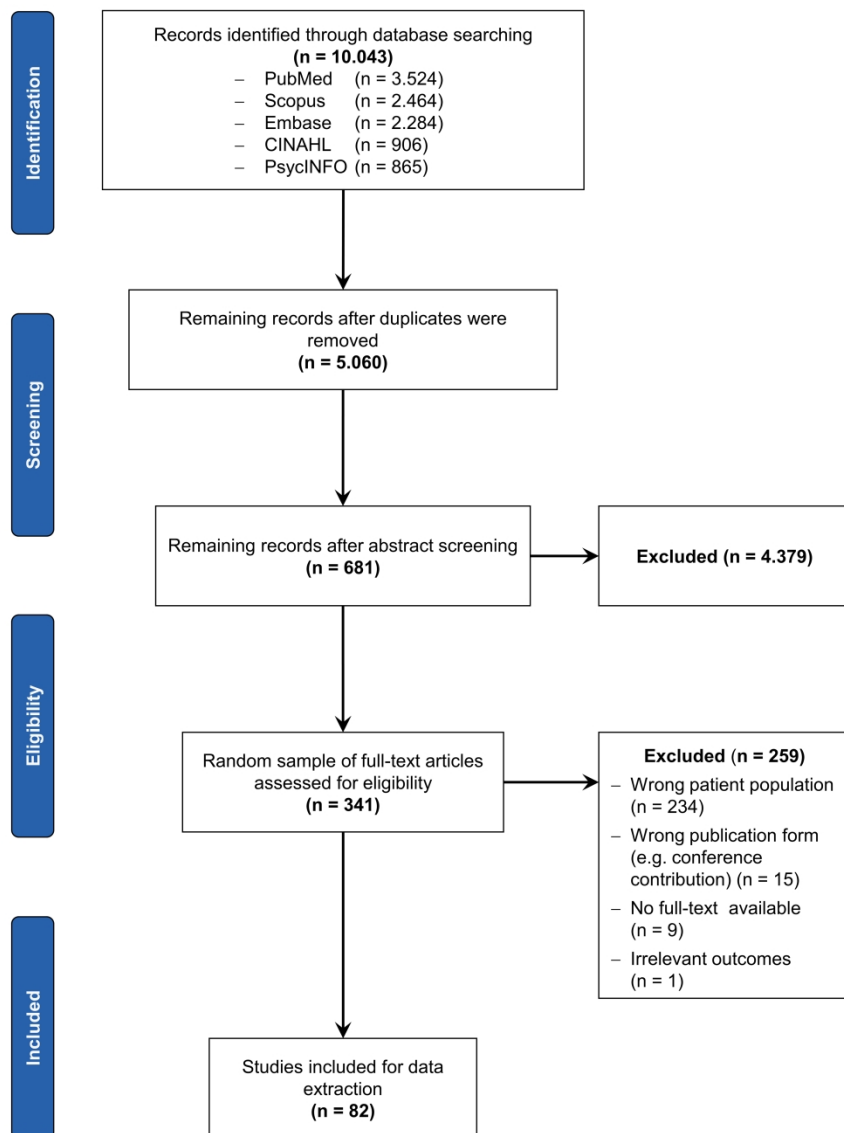

45 Figure 1. Preferred Reporting Items for Systematic Reviews and Meta-Analyses (PRISMA) flow chart.

46 169x225mm (600 x 600 DPI)

## Appendix A

### Search strategy Embase

1. aged/
2. very elderly/
3. aging/
4. "elder\*".ab,ti.
5. "senior\*".ab,ti.
6. "geriatric\*".ab,ti.
7. aging.ab,ti.
8. ageing.ab,ti.
9. "geriatric assessment"/
10. "limited mobility"/
11. "Sickness Impact Profile"/
12. "risk factor"/
13. "independent living"/
14. health/
15. "mental health"/
16. "quality of life"/
17. "women's health"/
18. "men's health"/
19. "health status"/
20. "International Classification of Functioning, Disability and Health"/
21. "community living"/
22. "coping behavior"/
23. disability/
24. "environmental factor"/
25. performance/
26. "physical disability"/
27. "ADL disability"/

- 1
- 2
- 3 28. "psychologic assessment"/
- 4
- 5 29. "self care"/
- 6
- 7 30. "social environment"/
- 8
- 9 31. "social interaction"/
- 10
- 11 32. "social life"/
- 12
- 13 33. "social problem"/
- 14
- 15 34. "wellbeing"/
- 16
- 17 35. "abilit\*" .ab,ti.
- 18
- 19 36. mobility.ab,ti.
- 20
- 21 37. "daily routine" .ab,ti.
- 22
- 23 38. "social life" .ab,ti.
- 24
- 25 39. performance.ab,ti.
- 26
- 27 40. self-care.ab,ti.
- 28
- 29 41. selfcare.ab,ti.
- 30
- 31 42. "social interaction" .ab,ti.
- 32
- 33 43. "interpersonal interaction" .ab,ti.
- 34
- 35 44. "coping strategy" .ab,ti.
- 36
- 37 45. "coping strategies" .ab,ti.
- 38
- 39 46. communitydwelling.ab,ti.
- 40
- 41 47. "community dwelling" .ab,ti.
- 42
- 43 48. "independent living" .ab,ti.
- 44
- 45 49. "independently living" .ab,ti.
- 46
- 47 50. "contextual factor\*" .ab,ti.
- 48
- 49 51. "protective factor\*" .ab,ti.
- 50
- 51 52. "risk factor\*" .ab,ti.
- 52
- 53 53. "personal factor\*" .ab,ti.
- 54
- 55 54. "environmental factor\*" .ab,ti.
- 56
- 57 55. "living alone" .ab,ti.
- 58
- 59 56. "sociocultural factor\*" .ab,ti.
- 60

- 1
- 2
- 3 57. "psychosocial factor\*".ab,ti.
- 4
- 5 58. "social environment".ab,ti.
- 6
- 7 59. "quality of life".ab,ti.
- 8
- 9 60. well-being.ab,ti.
- 10
- 11 61. wellbeing.ab,ti.
- 12
- 13 62. wellness.ab,ti.
- 14
- 15 63. ICF.ab,ti.
- 16
- 17 64. "International Classification of Functioning".ab,ti.
- 18
- 19 65. health.ab,ti.
- 20
- 21 66. "medical problem\*".ab,ti.
- 22
- 23 67. "psychological problem\*".ab,ti.
- 24
- 25 68. "social problem\*".ab,ti.
- 26
- 27 69. "physical change\*".ab,ti.
- 28
- 29 70. "physical illness".ab,ti.
- 30
- 31 71. "psychological change\*".ab,ti.
- 32
- 33 72. impairment.ab,ti.
- 34
- 35 73. "mental change\*".ab,ti.
- 36
- 37 74. "psychological assessment".ab,ti.
- 38
- 39 75. "cognitive assessment".ab,ti.
- 40
- 41 76. "needs assessment".ab,ti.
- 42
- 43 77. "neuropsychological assessment".ab,ti.
- 44
- 45 78. "behavioural assessment".ab,ti.
- 46
- 47 79. "behavioral assessment".ab,ti.
- 48
- 49 80. "social participation".ab,ti.
- 50
- 51 81. "activities of daily living".ab,ti.
- 52
- 53 82. "daily living activities".ab,ti.
- 54
- 55 83. "body function".ab,ti.
- 56
- 57 84. "body functions".ab,ti.
- 58
- 59 85. "body structures".ab,ti.
- 60

- 1  
2  
3 86. "body structure".ab,ti.  
4  
5 87. "social participation"/  
6  
7 88. "daily life activity"/  
8  
9 89. 80 or 81 or 82 or 83 or 84 or 85 or 86 or 87 or 88  
10  
11 90. (English or German).lg.  
12  
13 91. article.pt.  
14  
15 92. ("2007" or "2008" or "2009" or "2010" or "2011" or "2012" or "2013" or "2014" or "2015" or  
16 "2016" or "2017").yr.  
17  
18 93. "home environment".ab,ti.  
19  
20 94. "urban environment".ab,ti.  
21  
22 95. disability.ab,ti.  
23  
24 96. disabilities.ab,ti.  
25  
26 97. disable.ab,ti.  
27  
28 98. disabled.ab,ti.  
29  
30 99. disablement.ab,ti.  
31  
32 100. function.ab,ti.  
33  
34 101. functions.ab,ti.  
35  
36 102. functioning.ab,ti.  
37  
38 103. functional.ab,ti.  
39  
40 104. 1 or 2 or 3 or 4 or 5 or 6 or 7 or 8  
41  
42 105. 13 or 46 or 47 or 48 or 49 or 93 or 94  
43  
44 106. 9 or 10 or 11 or 12 or 14 or 15 or 16 or 17 or 18 or 19 or 20 or 21 or 22 or 23 or 24 or 25  
45 or 26 or 27 or 28 or 29 or 30 or 31 or 32 or 33 or 34 or 35 or 36 or 37 or 38 or 39 or 40 or 41  
46 or 42 or 43 or 44 or 45 or 50 or 51 or 52 or 53 or 54 or 55 or 56 or 57 or 58 or 59 or 60 or 61  
47 or 62 or 63 or 64 or 65 or 66 or 67 or 68 or 69 or 70 or 71 or 72 or 73 or 74 or 75 or 76 or 77  
48 or 78 or 79 or 95 or 96 or 97 or 98 or 99 or 100 or 101 or 102 or 103  
49  
50 107. 89 and 104 and 105 and 106  
51  
52 108. 90 and 92 and 107  
53  
54  
55  
56  
57  
58  
59  
60



## Appendix B

### References for included articles

1. Aartolahti E, Hakkinen A, Lonroos E, et al. Relationship between functional vision and balance and mobility performance in community-dwelling older adults. *Aging Clin Exp Res*. 2013;25(5):545-52.10.1007/s40520-013-0120-z.
2. Abellan van Kan G, Cesari M, Gillette-Guyonnet S, et al. Sarcopenia and cognitive impairment in elderly women: results from the EPIDOS cohort. *Age Ageing*. 2013;42(2):196-202.10.1093/ageing/afs173.
3. Ahluwalia SC, Gill TM, Baker DI, et al. Perspectives of older persons on bathing and bathing disability: A qualitative study. *J Am Geriatr Soc*. 2010;58(3):450-6.
4. Almeida OP, Yeap BB, Hankey GJ, et al. Association of depression with sexual and daily activities: A community study of octogenarian men. *Am J Geriatr Psychiatry*. 2015;23(3):234-42.10.1016/j.jagp.2013.09.007.
5. Behm L, Eklund K, Wilhelmson K, et al. Health Promotion Can Postpone Frailty: Results from the RCT Elderly Persons in the Risk Zone. *Public Health Nurs*. 2016;33(4):303-15.10.1111/phn.12240.
6. Berkemeyer S, Schumacher J, Thiem U, et al. Bone T-scores and functional status: A cross-sectional study on german elderly. *PLoS ONE*. 2009;4(12).10.1371/journal.pone.0008216.
7. Blain H, Carriere I, Sourial N, et al. Balance and walking speed predict subsequent 8-year mortality independently of current and intermediate events in well-functioning women aged 75 years and older. *J Nutr Health Aging*. 2010;14(7):595-600.10.1007/s12603-010-0111-0.
8. Bollwein J, Diekmann R, Kaiser MJ, et al. Dietary quality is related to frailty in community-dwelling older adults. *J Gerontol A Biol Sci Med Sci*. 2013;68(4):483-9.10.1093/gerona/gls204.
9. Brännström H, Bäckman M, Fischer RS. Walking on the edge: Meanings of living in an ageing body and using a walker in everyday life - A phenomenological hermeneutic study. *International Journal of Older People Nursing*. 2013;8(2):116-22.10.1111/j.1748-3743.2012.00334.x.
10. Brown CJ, Kennedy RE, Lo AX, et al. Impact of Emergency Department Visits and Hospitalization on Mobility Among Community-Dwelling Older Adults. *Am J Med*. 2016;129(10):1124.e9-.e15.10.1016/j.amjmed.2016.05.016.
11. Byles JE, Leigh L, Vo K, et al. Life space and mental health: a study of older community-dwelling persons in Australia. *Aging & Mental Health*. 2015;19(2):98-106.10.1080/13607863.2014.917607.
12. Calvert JF, Kaye J, Leahy M, et al. Technology use by rural and urban oldest old. *Technol Health Care*. 2009;17(1):1-11.10.3233/THC-2009-0527.
13. Chipperfield JG, Newall NE, Chuchmach LP, et al. Differential determinants of men's and women's everyday physical activity in later life. *Journals of Gerontology - Series B Psychological Sciences and Social Sciences*. 2008;63(4):S211-S8.
14. Dahlin-Ivanoff S, Haak M, Fange A, et al. The multiple meaning of home as experienced by very old Swedish people. *Scandinavian journal of occupational therapy*. 2007;14(1):25-32.10.1080/11038120601151714.
15. Diez-Ruiz A, Bueno-Errandonea A, Nunez-Barrio J, et al. Factors associated with frailty in primary care: a prospective cohort study. *BMC Geriatr*. 2016;16:91.10.1186/s12877-016-0263-9.
16. Eckerblad J, Theander K, Ekdahl A, et al. To adjust and endure: a qualitative study of symptom burden in older people with multimorbidity. *Appl Nurs Res*. 2015;28(4):322-7.10.1016/j.apnr.2015.03.008.

17. El-Khoury F, Cassou B, Latouche A, et al. Effectiveness of two year balance training programme on prevention of fall induced injuries in at risk women aged 75-85 living in community: Ossébo randomised controlled trial. *BMJ (Online)*. 2015;351.10.1136/bmj.h3830.
18. Eronen J, von Bonsdorff M, Rantakokko M, et al. Socioeconomic Status and Life-Space Mobility in Old Age. *Journal of aging and physical activity*. 2016;24(4):617-23.10.1123/japa.2015-0196.
19. Fabre JM, Wood RH, Cherry KE, et al. Age-related deterioration in flexibility is associated with health-related quality of life in nonagenarians. *J Geriatr Phys Ther*. 2007;30(1):16-22.
20. Fänge A, Ivanoff SD. The home is the hub of health in very old age: Findings from the ENABLE-AGE Project. *Arch Gerontol Geriatr*. 2009;48(3):340-5.10.1016/j.archger.2008.02.015.
21. Formiga F, Ferrer A, Padrós G, et al. Diabetes Mellitus as a Risk Factor for Functional and Cognitive Decline in Very Old People: The Octabaix Study. *Journal of the American Medical Directors Association*. 2014;15(12):924-8.10.1016/j.jamda.2014.07.019.
22. Formiga F, Ferrer A, Padros G, et al. Evidence of functional declining and global comorbidity measured at baseline proved to be the strongest predictors for long-term death in elderly community residents aged 85 years: A 5-year follow-up evaluation, the OCTABAIX study. *Clin Interv Aging*. 2016;11:437-44.10.2147/CIA.S101447.
23. Fritel X, Lachal L, Cassou B, et al. Mobility impairment is associated with urge but not stress urinary incontinence in community-dwelling older women: results from the Ossebo study. *BJOG*. 2013;120(12):1566-72.10.1111/1471-0528.12316.
24. Gustafsson S, Eklund K, Wilhelmson K, et al. Long-term outcome for ADL following the health-promoting RCT - elderly persons in the risk zone. *Gerontologist*. 2013;53(4):654-63.10.1093/geront/gns121.
25. Gustafsson S, Wilhelmson K, Eklund K, et al. Health-promoting interventions for persons aged 80 and older are successful in the short term - results from the randomized and three-armed Elderly Persons in the Risk Zone study. *J Am Geriatr Soc*. 2012;60(3):447-54.10.1111/j.1532-5415.2011.03861.x.
26. Haak M, Fänge A, Iwarsson S, et al. Home as a signification of independence and autonomy: Experiences among old Swedish people. *Scandinavian Journal of Occupational Therapy*. 2007;14(1):16-24.10.1080/11038120601024929.
27. Hammar IO, Dahlin-Ivanoff S, Wilhelmson K, et al. Shifting between self-governing and being governed: A qualitative study of older persons' self-determination. *BMC Geriatr*. 2014;14(1).10.1186/1471-2318-14-126.
28. Hegendörfer E, Vaes B, Andreeva E, et al. Predictive Value of Different Expressions of Forced Expiratory Volume in 1 Second (FEV1) for Adverse Outcomes in a Cohort of Adults Aged 80 and Older. *Journal of the American Medical Directors Association*. 2017;18(2):123-30.10.1016/j.jamda.2016.08.012.
29. Heyl V, Wahl H. Cognitive ability as a resource for everyday functioning among older adults who are visually impaired. *Journal of Visual Impairment & Blindness*. 2010;104(7):391-403.
30. Hoeksema AR, Spoorenberg S, Peters LL, et al. Elderly with remaining teeth report less frailty and better quality of life than edentulous elderly: a cross-sectional study. *Oral Dis*. 2017;23(4):526-36.10.1111/odi.12644.
31. Horgen G, Eilertsen G, Falkenberg H. Lighting old age - how lighting impacts the ability to grow old in own housing, part one. *Work*. 2012;41 Suppl 1:3385-7.10.3233/wor-2012-0612-3385.
32. Houston DK, Tooze JA, Davis CC, et al. Serum 25-hydroxyvitamin D and physical function in older adults: the Cardiovascular Health Study All Stars. *J Am Geriatr Soc*. 2011;59(10):1793-801.10.1111/j.1532-5415.2011.03601.x.

- 1  
2  
3 33. Idland G, Rydwick E, Smastuen MC, et al. Predictors of mobility in community-dwelling  
4 women aged 85 and older. *Disabil Rehabil*. 2013;35(11):881-  
5 7.10.3109/09638288.2012.712195.
- 6  
7 34. Iwarsson S, Horstmann V, Carlsson G, et al. Person-environment fit predicts falls in older  
8 adults better than the consideration of environmental hazards only. *Clin Rehabil*.  
9 2009;23(6):558-67.10.1177/0269215508101740.
- 10  
11 35. Landi F, Russo A, Liperoti R, et al. Anorexia, physical function, and incident disability among  
12 the frail elderly population: Results from the iLSIRENTE study. *Journal of the American*  
13 *Medical Directors Association*. 2010;11(4):268-74.10.1016/j.jamda.2009.12.088.
- 14  
15 36. Landi F, Russo A, Liperoti R, et al. Midarm muscle circumference, physical performance and  
16 mortality: Results from the aging and longevity study in the Sirente geographic area  
17 (iLSIRENTE study). *Clin Nutr*. 2010;29(4):441-7.10.1016/j.clnu.2009.12.006.
- 18  
19 37. Larsson A, Haglund L, Hagberg J. Doing everyday life-experiences of the oldest old.  
20 *Scandinavian Journal of Occupational Therapy*. 2009;16(2):99-  
21 109.10.1080/11038120802409762.
- 22  
23 38. Laudisio A, Marzetti E, Antonica L, et al. Metabolic syndrome and quality of life in the elderly:  
24 Age and gender differences. *Eur J Nutr*. 2013;52(1):307-16.
- 25  
26 39. Laudisio A, Marzetti E, Franceschi F, et al. Disability is associated with emergency room  
27 visits in the elderly: a population-based study. *Aging Clin Exp Res*. 2015;27(5):663-  
28 71.10.1007/s40520-015-0324-5.
- 29  
30 40. Laudisio A, Marzetti E, Pagano F, et al. Masticatory dysfunction is associated with worse  
31 functional ability: a population-based study. *J Clin Periodontol*. 2010;37(2):113-  
32 9.10.1111/j.1600-051X.2009.01518.x.
- 33  
34 41. Lofqvist C, Tomsone S, Iwarsson S, et al. Changes in Home and Health over Nine Years  
35 among very Old People in Latvia - Results from the ENABLE-AGE Project. *Journal of cross-*  
36 *cultural gerontology*. 2017;32(1):17-29.
- 37  
38 42. Mahler M, Sarvimäki A. Fear of falling from a daily life perspective; narratives from later life.  
39 *Scand J Caring Sci*. 2012;26(1):38-44.10.1111/j.1471-6712.2011.00901.x.
- 40  
41 43. Mangani I, Cesari M, Russo A, et al. Physical function, physical activity and recent falls.  
42 Results from the 'Invecchiamento e Longevità nel Sirente (iLSIRENTE)' Study. *Aging Clinical*  
43 *& Experimental Research*. 2008;20(3):234-41.
- 44  
45 44. Manty M, Rantanen T, Era P, et al. Fatigue and depressive symptoms in older people. *J Appl*  
46 *Gerontol*. 2014;33(4):505-14.10.1177/0733464812454011.
- 47  
48 45. Mikkola TM, Polku H, Portegijs E, et al. Self-reported hearing is associated with time spent  
49 out-of-home and withdrawal from leisure activities in older community-dwelling adults. *Aging*  
50 *Clin Exp Res*. 2016;28(2):297-302.10.1007/s40520-015-0389-1.
- 51  
52 46. Mikkola TM, Portegijs E, Rantakokko M, et al. Association of self-reported hearing difficulty to  
53 objective and perceived participation outside the home in older community-dwelling adults. *J*  
54 *Aging Health*. 2015;27(1):103-22.10.1177/0898264314538662.
- 55  
56 47. Murabito JM, Pencina MJ, Kelly-Hayes M, et al. Temporal trends in self-reported functional  
57 limitations and physical disability among the community-dwelling elderly population: the  
58 Framingham Heart Study. *Am J Public Health*. 2008;98(7):1256-  
59 62.10.2105/AJPH.2007.128132.
- 60  
61 48. Muscari A, Bianchi G, Forti P, et al. Physical Activity and Other Determinants of Survival in  
62 the Oldest Adults. *J Am Geriatr Soc*. 2017;65(2):402-6.10.1111/jgs.14569.
- 63  
64 49. Nitsch D, Mann AG, Bulpitt C, et al. Impairment of kidney function and reduced quality-of-life  
65 in older people: A cross-sectional study. *Age Ageing*. 2011;40(3):381-  
66 7.10.1093/ageing/afr024.

- 1  
2  
3 50. Nykänen I, Lönnroos E, Kautiainen H, et al. Nutritional screening in a population-based  
4 cohort of community-dwelling older people. *European Journal of Public Health*.  
5 2013;23(3):405-9.10.1093/eurpub/cks026.
- 6  
7 51. Polku H, Mikkola TM, Rantakokko M, et al. Self-reported hearing difficulties and changes in  
8 life-space mobility among community-dwelling older adults: a Two-year follow-Up study.  
9 *BMC Geriatr*. 2015;15:121.10.1186/s12877-015-0119-8.
- 10  
11 52. Portegijs E, Rantakokko M, Viljanen A, et al. Is frailty associated with life-space mobility and  
12 perceived autonomy in participation outdoors? A longitudinal study. *Age & Ageing*.  
13 2016;45(4):550-3.10.1093/ageing/afw072.
- 14  
15 53. Quail JM, Addona V, Wolfson C, et al. Association of unmet need with self-rated health in a  
16 community dwelling cohort of disabled seniors 75 years of age and over. *European Journal  
17 of Ageing*. 2007;4(1):45-55.10.1007/s10433-007-0042-8.
- 18  
19 54. Rantakokko M, Iwarsson S, Vahaluoto S, et al. Perceived environmental barriers to outdoor  
20 mobility and feelings of loneliness among community-dwelling older people. *Journals of  
21 Gerontology - Series A Biological Sciences and Medical Sciences*. 2014;69(12):1562-  
22 8.10.1093/gerona/glu069.
- 23  
24 55. Rantakokko M, Portegijs E, Viljanen A, et al. Mobility Modification Alleviates Environmental  
25 Influence on Incident Mobility Difficulty among Community-Dwelling Older People: A Two-  
26 Year Follow-Up Study. *PLoS ONE*. 2016;11(4):e0154396.10.1371/journal.pone.0154396.
- 27  
28 56. Rantz M, Lane K, Phillips LJ, et al. Enhanced registered nurse care coordination with sensor  
29 technology: Impact on length of stay and cost in aging in place housing. *Nurs Outlook*.  
30 2015;63(6):650-5.10.1016/j.outlook.2015.08.004.
- 31  
32 57. Rao SK, Wallace LMK, Theou O, et al. Is it better to be happy or not depressed? Depression  
33 mediates the effect of psychological well-being on adverse health outcomes in older adults.  
34 *Int J Geriatr Psychiatry*. 2016.10.1002/gps.4559.
- 35  
36 58. Rapo-Pylkko S, Haanpaa M, Liira H. Chronic pain among community-dwelling elderly: a  
37 population-based clinical study. *Scand J Prim Health Care*. 2016;34(2):159-  
38 64.10.3109/02813432.2016.1160628.
- 39  
40 59. Rasinaho M, Hirvensalo M, Leinonen R, et al. Motives for and barriers to physical activity  
41 among older adults with mobility limitations. *Journal of Aging and Physical Activity*.  
42 2007;15(1):90-102.
- 43  
44 60. Richards J, Rankaduwa W. Housing Canada's oldest-old: correlates of their residential  
45 status. *Journal of Housing for the Elderly*. 2008;22(4):376-403.
- 46  
47 61. Rydwick E, Frändin K, Akner G. Effects of a physical training and nutritional intervention  
48 program in frail elderly people regarding habitual physical activity level and activities of daily  
49 living-A randomized controlled pilot study. *Arch Gerontol Geriatr*. 2010;51(3):283-  
50 9.10.1016/j.archger.2009.12.001.
- 51  
52 62. Rydwick E, Lammes E, Frändin K, et al. Effects of a physical and nutritional intervention  
53 program for frail elderly people over age 75. A randomized controlled pilot treatment trial.  
54 *Aging Clinical and Experimental Research*. 2008;20(2):159-70.
- 55  
56 63. Sabayan B, Oleksik AM, Maier AB, et al. High blood pressure and resilience to physical and  
57 cognitive decline in the oldest old: The Leiden 85-Plus Study. *J Am Geriatr Soc*.  
58 2012;60(11):2014-9.
- 59  
60 64. Sallinen M, Hentonen O, Karki A. Technology and active agency of older adults living in  
61 service house environment. *Disability and Rehabilitation Assistive technology*. 2015;10(1):27-  
62 31.10.3109/17483107.2013.836685.
- 63  
64 65. Sampson EL, Bulpitt CJ, Fletcher AE. Survival of Community-dwelling older people: The  
65 effect of cognitive impairment and social engagement. *J Am Geriatr Soc*. 2009;57(6):985-91.
- 66  
67 66. Savikko N, Routasalo P, Tilvis R, et al. Psychosocial group rehabilitation for lonely older  
68 people: Favourable processes and mediating factors of the intervention leading to alleviated

- 1  
2  
3 loneliness. *International Journal of Older People Nursing*. 2010;5(1):16-24.10.1111/j.1748-  
4 3743.2009.00191.x.
- 5  
6 67. Sixsmith J, Sixsmith A, Fange AM, et al. Healthy ageing and home: The perspectives of very  
7 old people in five european countries. *Soc Sci Med*. 2014;106:1-9.
- 8  
9 68. Thompson HJ, Demiris G, Rue T, et al. A Holistic approach to assess older adults' wellness  
10 using e-health technologies. *Telemedicine journal and e-health : the official journal of the*  
11 *American Telemedicine Association*. 2011;17(10):794-800.
- 12  
13 69. Tsai LT, Portegijs E, Rantakokko M, et al. The association between objectively measured  
14 physical activity and life-space mobility among older people. *Scand J Med Sci Sports*.  
15 2015;25(4):e368-73.10.1111/sms.12337.
- 16  
17 70. Tsai LT, Rantakokko M, Portegijs E, et al. Environmental mobility barriers and walking for  
18 errands among older people who live alone vs. with others. *BMC Public Health*.  
19 2013;13(1).10.1186/1471-2458-13-1054.
- 20  
21 71. van Bommel T, Delgado V, Bax JJ, et al. Impact of valvular heart disease on activities of  
22 daily living of nonagenarians: the Leiden 85-plus study a population based study. *BMC*  
23 *Geriatr*. 2010;10:17.10.1186/1471-2318-10-17.
- 24  
25 72. van Houwelingen AH, den Elzen WP, le Cessie S, et al. Consequences of interaction of  
26 functional, somatic, mental and social problems in community-dwelling older people. *PLoS*  
27 *ONE*. 2015;10(4):e0121013.10.1371/journal.pone.0121013.
- 28  
29 73. Vasara P. Not ageing in place: Negotiating meanings of residency in age-related housing.  
30 *Journal of aging studies*. 2015;35:55-64.10.1016/j.jaging.2015.07.004.
- 31  
32 74. Vestergaard S, Kronborg C, Puggaard L. Home-based video exercise intervention for  
33 community-dwelling frail older women: A randomized controlled trial. *Aging Clin Exp Res*.  
34 2008;20(5):479-86.
- 35  
36 75. Von Humboldt S, Leal I. The Old and the Oldest-old: Do They Have Different Perspectives  
37 on Adjustment to Aging? *International Journal of Gerontology*. 2015;9(3):156-60.
- 38  
39 76. Wang K, Delbaere K, Brodie M, et al. Differences between Gait on Stairs and Flat Surfaces  
40 in Relation to Fall Risk and Future Falls. *IEEE journal of biomedical and health informatics*.  
41 2017.10.1109/jbhi.2017.2677901.
- 42  
43 77. Werth BL, Williams KA, Pont LG. Laxative Use and Self-Reported Constipation in a  
44 Community-Dwelling Elderly Population: A Community-Based Survey From Australia.  
45 *Gastroenterol Nurs*. 2017;40(2):134-41.10.1097/sga.000000000000144.
- 46  
47 78. Williams ID, O'Doherty LJ, Mitchell GK, et al. Identifying unmet needs in older patients:  
48 Nurse-GP collaboration in general practice. *Aust Fam Physician*. 2007;36(9):772-6.
- 49  
50 79. Wilson K, Mottram P, Sixsmith A. Depressive symptoms in the very old living alone:  
51 Prevalence, incidence and risk factors. *Int J Geriatr Psychiatry*. 2007;22(4):361-  
52 6.10.1002/gps.1682.
- 53  
54 80. Wong CH, Weiss D, Sourial N, et al. Frailty and its association with disability and comorbidity  
55 in a community-dwelling sample of seniors in Montreal: A cross-sectional study. *Aging Clin*  
56 *Exp Res*. 2010;22(1):54-62.10.3275/6675.
- 57  
58 81. Young Y. Factors Associated With Permanent Transition From Independent Living to  
59 Nursing Home in a Continuing Care Retirement Community. *Journal of the American Medical*  
60 *Directors Association*. 2009;10(7):491-7.10.1016/j.jamda.2009.03.019.
82. Zingmond DS, Ettner SL, Wilber KH, et al. Association of claims-based quality of care  
measures with outcomes among community-dwelling vulnerable elders. *Med Care*.  
2011;49(6):553-9.10.1097/MLR.0b013e31820e5aab.

## Appendix C

## Characteristics of included studies

| Study                          | Methods   |                                                                    |                                                                                      |                                                                  |                | Demographics           |             |               |                                           |
|--------------------------------|-----------|--------------------------------------------------------------------|--------------------------------------------------------------------------------------|------------------------------------------------------------------|----------------|------------------------|-------------|---------------|-------------------------------------------|
|                                | Country   | Design                                                             | Type of intervention<br>(if applicable)                                              | Type of control<br>(if applicable)                               | Sample<br>size | Type of<br>sample      | Age         | Female<br>(%) | Included<br>in 1 <sup>st</sup><br>Dataset |
| Aartolahti<br>et al.<br>(2013) | Finland   | cross-<br>sectional<br>study                                       | multidisciplinary intervention,<br>focused on medication,<br>nutrition, and exercise | n/a                                                              | 576            | community-<br>dwelling | 76-<br>100  | 70.0          | X                                         |
| Abellan et<br>al. (2013)       | France    | cross-<br>sectional<br>study                                       | n/a                                                                                  | n/a                                                              | 3,025          | community-<br>dwelling | ≥75         | 100.0         | X                                         |
| Ahluwalia<br>et al.<br>(2010)  | USA       | qualitative<br>study using<br>interviews and<br>grounded<br>theory | n/a                                                                                  | n/a                                                              | 23             | community-<br>dwelling | ≥78         | 61.0          | X                                         |
| Almeida et<br>al. (2015)       | Australia | cross-<br>sectional<br>study                                       | n/a                                                                                  | n/a                                                              | 1,649          | community-<br>dwelling | 80-<br>93.7 | 0.0           |                                           |
| Behm et al.<br>(2015)          | Sweden    | RCT with<br>follow-up after<br>1 and 2 years                       | preventive home visit group,<br>senior meeting group                                 | access to the ordinary<br>range of services for older<br>persons | 459            | community-<br>dwelling | 80-97       | 64.0          | X                                         |
| Berkemeyer<br>et al.<br>(2009) | Germany   | cross-<br>sectional<br>study                                       | n/a                                                                                  | n/a                                                              | 440            | community-<br>dwelling | ≥75         | 44.8          | X                                         |
| Blain et al.<br>(2010)         | France    | longitudinal<br>study                                              | n/a                                                                                  | n/a                                                              | 1300           | community-<br>dwelling | ≥75         | 100.0         |                                           |

1  
2  
3  
4  
5  
6  
7  
8  
9  
10  
11  
12  
13  
14  
15  
16  
17  
18  
19  
20  
21  
22  
23  
24  
25  
26  
27  
28  
29  
30  
31  
32  
33  
34  
35  
36  
37  
38  
39  
40  
41  
42  
43  
44  
45  
46

For peer review only

|                              |           |                                                                                      |     |     |     |                    |       |      |   |
|------------------------------|-----------|--------------------------------------------------------------------------------------|-----|-----|-----|--------------------|-------|------|---|
| Bollwein et al. (2013)       | Germany   | cross-sectional study                                                                | n/a | n/a | 192 | community-dwelling | 75-96 | 64.6 | X |
| Brännström et al. (2013)     | Sweden    | qualitative study using narrative interviews and phenomenological hermeneutic method | n/a | n/a | 7   | community-dwelling | 79-95 | 85.7 |   |
| Brown et al. (2016)          | USA       | longitudinal cohort study                                                            | n/a | n/a | 410 | community-dwelling | ≥75   | 57.0 | X |
| Byles et al. (2015)          | Australia | cross-sectional study                                                                | n/a | n/a | 260 | community-dwelling | 75-80 | 50.4 | X |
| Calvert et al. (2009)        | USA       | cross-sectional study                                                                | n/a | n/a | 306 | community-dwelling | ≥85   | 62.0 | X |
| Chipperfield et al. (2008)   | Canada    | prospective cohort study                                                             | n/a | n/a | 198 | community-dwelling | 80-98 | 63.1 |   |
| Dahlin-Ivanoff et al. (2007) | Sweden    | qualitative study using interviews and grounded theory                               | n/a | n/a | 40  | community-dwelling | 80-89 | 57.5 |   |
| Diez-Ruiz et al. (2016)      | Spain     | prospective cohort study with 2 years follow-up                                      | n/a | n/a | 215 | community dwelling | ≥75   | 63.0 | X |

|    |               |         |                                                                         |                                                                                                                                                                                  |                                                                           |       |                    |       |       |   |
|----|---------------|---------|-------------------------------------------------------------------------|----------------------------------------------------------------------------------------------------------------------------------------------------------------------------------|---------------------------------------------------------------------------|-------|--------------------|-------|-------|---|
| 1  |               |         |                                                                         |                                                                                                                                                                                  |                                                                           |       |                    |       |       |   |
| 2  |               |         |                                                                         |                                                                                                                                                                                  |                                                                           |       |                    |       |       |   |
| 3  | Eckerblad     | Sweden  | qualitative study using semi-structured interviews and content analysis | n/a                                                                                                                                                                              | n/a                                                                       | 20    | community-dwelling | 79-89 | 80.0  |   |
| 4  | et al.        |         |                                                                         |                                                                                                                                                                                  |                                                                           |       |                    |       |       |   |
| 5  | (2015)        |         |                                                                         |                                                                                                                                                                                  |                                                                           |       |                    |       |       |   |
| 6  |               |         |                                                                         |                                                                                                                                                                                  |                                                                           |       |                    |       |       |   |
| 7  |               |         |                                                                         |                                                                                                                                                                                  |                                                                           |       |                    |       |       |   |
| 8  |               |         |                                                                         |                                                                                                                                                                                  |                                                                           |       |                    |       |       |   |
| 9  |               |         |                                                                         |                                                                                                                                                                                  |                                                                           |       |                    |       |       |   |
| 10 |               |         |                                                                         |                                                                                                                                                                                  |                                                                           |       |                    |       |       |   |
| 11 | El-Khoury     | France  | RCT                                                                     | 2-year exercise programme of progressive balance retraining in reducing injurious falls, weekly supervised group sessions supplemented by individually prescribed home exercises | brochures about fall prevention, newsletters, four free exercise sessions | 706   | community-dwelling | 75-85 | 100.0 | X |
| 12 | et al.        |         |                                                                         |                                                                                                                                                                                  |                                                                           |       |                    |       |       |   |
| 13 | (2015)        |         |                                                                         |                                                                                                                                                                                  |                                                                           |       |                    |       |       |   |
| 14 |               |         |                                                                         |                                                                                                                                                                                  |                                                                           |       |                    |       |       |   |
| 15 |               |         |                                                                         |                                                                                                                                                                                  |                                                                           |       |                    |       |       |   |
| 16 |               |         |                                                                         |                                                                                                                                                                                  |                                                                           |       |                    |       |       |   |
| 17 |               |         |                                                                         |                                                                                                                                                                                  |                                                                           |       |                    |       |       |   |
| 18 |               |         |                                                                         |                                                                                                                                                                                  |                                                                           |       |                    |       |       |   |
| 19 | Eronen et     | Finland | cross-sectional study                                                   | n/a                                                                                                                                                                              | n/a                                                                       | 848   | community-dwelling | 75-90 | 62.0  | X |
| 20 | al. (2016)    |         |                                                                         |                                                                                                                                                                                  |                                                                           |       |                    |       |       |   |
| 21 |               |         |                                                                         |                                                                                                                                                                                  |                                                                           |       |                    |       |       |   |
| 22 |               |         |                                                                         |                                                                                                                                                                                  |                                                                           |       |                    |       |       |   |
| 23 | Fabre et al.  | USA     | population-based cohort study                                           | n/a                                                                                                                                                                              | n/a                                                                       | 74    | community-dwelling | ≥90   | 51.3  | X |
| 24 | (2007)        |         |                                                                         |                                                                                                                                                                                  |                                                                           |       |                    |       |       |   |
| 25 |               |         |                                                                         |                                                                                                                                                                                  |                                                                           |       |                    |       |       |   |
| 26 | Fänge et      | Sweden  | qualitative study using interviews and grounded theory                  | n/a                                                                                                                                                                              | n/a                                                                       | 40    | community-dwelling | 80-89 | 57.5  |   |
| 27 | al. (2009)    |         |                                                                         |                                                                                                                                                                                  |                                                                           |       |                    |       |       |   |
| 28 |               |         |                                                                         |                                                                                                                                                                                  |                                                                           |       |                    |       |       |   |
| 29 |               |         |                                                                         |                                                                                                                                                                                  |                                                                           |       |                    |       |       |   |
| 30 |               |         |                                                                         |                                                                                                                                                                                  |                                                                           |       |                    |       |       |   |
| 31 |               |         |                                                                         |                                                                                                                                                                                  |                                                                           |       |                    |       |       |   |
| 32 | Formiga et    | Spain   | longitudinal study                                                      | n/a                                                                                                                                                                              | n/a                                                                       | 167   | community-dwelling | ≥85   | 60.5  | X |
| 33 | al. (2014)    |         |                                                                         |                                                                                                                                                                                  |                                                                           |       |                    |       |       |   |
| 34 |               |         |                                                                         |                                                                                                                                                                                  |                                                                           |       |                    |       |       |   |
| 35 | Formiga et    | Spain   | RCT with 5-year follow-up                                               | falls and malnutrition prevention                                                                                                                                                | general primary care assessment                                           | 328   | community-dwelling | ≥85   | 61.6  | X |
| 36 | al. (2016)    |         |                                                                         |                                                                                                                                                                                  |                                                                           |       |                    |       |       |   |
| 37 |               |         |                                                                         |                                                                                                                                                                                  |                                                                           |       |                    |       |       |   |
| 38 | Fritel et al. | France  | observational cross-                                                    | n/a                                                                                                                                                                              | n/a                                                                       | 1,942 | community-dwelling | 75-85 | 100.0 | X |
| 39 | (2013)        |         |                                                                         |                                                                                                                                                                                  |                                                                           |       |                    |       |       |   |
| 40 |               |         |                                                                         |                                                                                                                                                                                  |                                                                           |       |                    |       |       |   |
| 41 |               |         |                                                                         |                                                                                                                                                                                  |                                                                           |       |                    |       |       |   |
| 42 |               |         |                                                                         |                                                                                                                                                                                  |                                                                           |       |                    |       |       |   |
| 43 |               |         |                                                                         |                                                                                                                                                                                  |                                                                           |       |                    |       |       |   |
| 44 |               |         |                                                                         |                                                                                                                                                                                  |                                                                           |       |                    |       |       |   |
| 45 |               |         |                                                                         |                                                                                                                                                                                  |                                                                           |       |                    |       |       |   |
| 46 |               |         |                                                                         |                                                                                                                                                                                  |                                                                           |       |                    |       |       |   |



1  
2  
3  
4  
5  
6  
7  
8  
9  
10  
11  
12  
13  
14  
15  
16  
17  
18  
19  
20  
21  
22  
23  
24  
25  
26  
27  
28  
29  
30  
31  
32  
33  
34  
35  
36  
37  
38  
39  
40  
41  
42  
43  
44  
45  
46

sectional  
study

|                                 |             |                                                           |                                                   |                                                                                    |      |                    |       |      |   |
|---------------------------------|-------------|-----------------------------------------------------------|---------------------------------------------------|------------------------------------------------------------------------------------|------|--------------------|-------|------|---|
| Gustafsson et al. (2013)        | Sweden      | RCT                                                       | preventive home visit group, senior meeting group | ordinary range of community services offered by the municipal care for the aged    | 459  | community-dwelling | 80-97 | 64.0 | X |
| Gustafsson et al. (2012)        | Sweden      | RCT                                                       | preventive home visit group, senior meeting group | access to the ordinary range of community services offered by the municipal agency | 459  | community-dwelling | 80-97 | 64.0 | X |
| Haak et al. (2007)              | Sweden      | qualitative study using interviews and grounded theory    | n/a                                               | n/a                                                                                | 40   | community-dwelling | 80-89 | 57.5 |   |
| Ottensvald Hammar et al. (2014) | Sweden      | qualitative study using interviews and grounded theory    | n/a                                               | n/a                                                                                | 11   | community-dwelling | 84-95 | 54.5 | X |
| Hegendörfer et al. (2017)       | Belgium     | prospective, observational, population based cohort study | n/a                                               | n/a                                                                                | 501  | community-dwelling | ≥80   | 63.0 | X |
| Heyl & Wahl (2010)              | Germany     | cross-sectional study                                     | n/a                                               | n/a                                                                                | 271  | community-dwelling | 75-94 | 54   |   |
| Hoeksema et al. (2017)          | Netherlands | cross-sectional study                                     | n/a                                               | n/a                                                                                | 1026 | community-dwelling | ≥75   | 59.0 | X |

|    |              |          |               |     |     |                |            |       |       |   |
|----|--------------|----------|---------------|-----|-----|----------------|------------|-------|-------|---|
| 1  |              |          |               |     |     |                |            |       |       |   |
| 2  |              |          |               |     |     |                |            |       |       |   |
| 3  | Horgen et    | Norway   | mixed         | n/a | n/a | 165            | community- | 75    | n/a   | X |
| 4  | al. (2012)   |          | methods       |     |     |                | dwelling   |       |       |   |
| 5  |              |          | study         |     |     |                |            |       |       |   |
| 6  |              |          |               |     |     |                |            |       |       |   |
| 7  | Houston et   | USA      | secondary     | n/a | n/a | 988            | community- | 77-   | 64.5  | X |
| 8  | al. (2011)   |          | analysis of a |     |     |                | dwelling   | 100   |       |   |
| 9  |              |          | longitudinal  |     |     |                |            |       |       |   |
| 10 |              |          | study with 3  |     |     |                |            |       |       |   |
| 11 |              |          | years of      |     |     |                |            |       |       |   |
| 12 |              |          | follow-up     |     |     |                |            |       |       |   |
| 13 |              |          |               |     |     |                |            |       |       |   |
| 14 | Idland et    | Norway   | prospective , | n/a | n/a | 307 (baseline) | community- | 75-92 | 100.0 | X |
| 15 | al. (2013)   |          | observational |     |     | 113 (follow-   | dwelling   |       |       |   |
| 16 |              |          | cohort study  |     |     | up)            |            |       |       |   |
| 17 |              |          | with 9 years  |     |     |                |            |       |       |   |
| 18 |              |          | follow-up     |     |     |                |            |       |       |   |
| 19 |              |          |               |     |     |                |            |       |       |   |
| 20 | Warsson et   | Sweden,  | secondary     | n/a | n/a | 834            | community- | 75-89 | 79.7  | X |
| 21 | al. (2009)   | Germany, | analysis of a |     |     |                | dwelling   |       |       |   |
| 22 |              | Latvia   | longitudinal  |     |     |                |            |       |       |   |
| 23 |              |          | survey study  |     |     |                |            |       |       |   |
| 24 |              |          | with 1 year   |     |     |                |            |       |       |   |
| 25 |              |          | follow-up     |     |     |                |            |       |       |   |
| 26 |              |          |               |     |     |                |            |       |       |   |
| 27 | Landi et al. | Italy    | secondary     | n/a | n/a | 357            | community- | ≥80   | 67.0  | X |
| 28 | (2010a)      |          | analysis of a |     |     |                | dwelling   |       |       |   |
| 29 |              |          | prospective   |     |     |                |            |       |       |   |
| 30 |              |          | cohort study  |     |     |                |            |       |       |   |
| 31 |              |          | (baseline)    |     |     |                |            |       |       |   |
| 32 |              |          |               |     |     |                |            |       |       |   |
| 33 | Landi et al. | Italy    | secondary     | n/a | n/a | 364 (baseline) | community- | ≥80   | 67.0  | X |
| 34 | (2010b)      |          | analysis of a |     |     | 205 (follow-   | dwelling   |       |       |   |
| 35 |              |          | prospective   |     |     | up)            |            |       |       |   |
| 36 |              |          | cohort study  |     |     |                |            |       |       |   |
| 37 |              |          | with 2 years  |     |     |                |            |       |       |   |
| 38 |              |          | follow-up     |     |     |                |            |       |       |   |
| 39 |              |          |               |     |     |                |            |       |       |   |
| 40 | Parsson et   | Sweden   | qualitative   | n/a | n/a | 18             | community- | 86-93 | 55.6  |   |
| 41 | al. (2009)   |          | study using   |     |     |                | dwelling   |       |       |   |
| 42 |              |          |               |     |     |                |            |       |       |   |
| 43 |              |          |               |     |     |                |            |       |       |   |
| 44 |              |          |               |     |     |                |            |       |       |   |
| 45 |              |          |               |     |     |                |            |       |       |   |
| 46 |              |          |               |     |     |                |            |       |       |   |

1  
2  
3  
4  
5  
6  
7  
8  
9  
10  
11  
12  
13  
14  
15  
16  
17  
18  
19  
20  
21  
22  
23  
24  
25  
26  
27  
28  
29  
30  
31  
32  
33  
34  
35  
36  
37  
38  
39  
40  
41  
42  
43  
44  
45  
46interviews,  
observations  
and  
phenomenolo  
gical method  
(Giorgi)cross-  
sectional  
study

n/a

n/a

356

community-  
dwelling

≥75

54.5

X

longitudinal,  
population-  
based study  
with 1-year  
follow-up

n/a

n/a

342

community-  
dwelling

≥75

56.0

X

cross-  
sectional  
study

n/a

n/a

350

community-  
dwelling

≥75

54.3

X

secondary  
analysis of a  
longitudinal  
study with 9  
years follow-  
up

n/a

n/a

59

community-  
dwelling

77-90

90.0

X

qualitative  
study using  
narrative  
interviews and  
thematic  
analysis

n/a

n/a

5

community-  
dwelling

81-94

100.0

secondary  
analysis of a  
prospective  
cohort study

n/a

n/a

364

community-  
dwelling

≥80

67.0

X

|    |             |          |               |     |     |       |            |       |      |   |
|----|-------------|----------|---------------|-----|-----|-------|------------|-------|------|---|
| 1  |             |          |               |     |     |       |            |       |      |   |
| 2  |             |          |               |     |     |       |            |       |      |   |
| 3  | Mänty et    | Denmark, | secondary     | n/a | n/a | 561   | community- | 75    | 55.0 | X |
| 4  | al. (2014)  | Finland  | analysis of a |     |     |       | dwelling   |       |      |   |
| 5  |             |          | longitudinal  |     |     |       |            |       |      |   |
| 6  |             |          | study         |     |     |       |            |       |      |   |
| 7  |             |          |               |     |     |       |            |       |      |   |
| 8  | Mikkola et  | Finland  | secondary     | n/a | n/a | 766   | community- | 75-90 | 62.7 | X |
| 9  | al. (2016)  |          | analysis of a |     |     |       | dwelling   |       |      |   |
| 10 |             |          | cross         |     |     |       |            |       |      |   |
| 11 |             |          | sectional and |     |     |       |            |       |      |   |
| 12 |             |          | longitudinal  |     |     |       |            |       |      |   |
| 13 |             |          | study         |     |     |       |            |       |      |   |
| 14 |             |          |               |     |     |       |            |       |      |   |
| 15 | Mikkola et  | Finland  | cross-        | n/a | n/a | 848   | community- | 75-90 | 62.0 | X |
| 16 | al. (2015)  |          | sectional     |     |     |       | dwelling   |       |      |   |
| 17 |             |          | study         |     |     |       |            |       |      |   |
| 18 |             |          |               |     |     |       |            |       |      |   |
| 19 | Murabito et | USA      | secondary     | n/a | n/a | 830   | community- | 79-88 | 61.4 | X |
| 20 | al. (2008)  |          | analysis of a |     |     |       | dwelling   |       |      |   |
| 21 |             |          | prospective   |     |     |       |            |       |      |   |
| 22 |             |          | cohort study  |     |     |       |            |       |      |   |
| 23 |             |          |               |     |     |       |            |       |      |   |
| 24 | Muscari et  | Italy    | prospective,  | n/a | n/a | 500   | community- | 85-   | 65.8 | X |
| 25 | al. (2017)  |          | longitudinal  |     |     |       | dwelling   | 102   |      |   |
| 26 |             |          | population-   |     |     |       |            |       |      |   |
| 27 |             |          | based study   |     |     |       |            |       |      |   |
| 28 |             |          | with 7 years  |     |     |       |            |       |      |   |
| 29 |             |          | follow-up     |     |     |       |            |       |      |   |
| 30 |             |          |               |     |     |       |            |       |      |   |
| 31 | Nitsch et   | UK       | cross-        | n/a | n/a | 2,967 | community- | ≥75   | 59.7 |   |
| 32 | al. (2011)  |          | sectional     |     |     |       | dwelling   |       |      |   |
| 33 |             |          | study         |     |     |       |            |       |      |   |
| 34 |             |          |               |     |     |       |            |       |      |   |
| 35 | Nykänen et  | Finland  | population    | n/a | n/a | 696   | community- | ≥75   | 69.4 | X |
| 36 | al. (2013)  |          | based         |     |     |       | dwelling   |       |      |   |
| 37 |             |          | randomized    |     |     |       |            |       |      |   |
| 38 |             |          | comparative   |     |     |       |            |       |      |   |
| 39 |             |          | study         |     |     |       |            |       |      |   |
| 40 |             |          |               |     |     |       |            |       |      |   |
| 41 |             |          |               |     |     |       |            |       |      |   |
| 42 |             |          |               |     |     |       |            |       |      |   |
| 43 |             |          |               |     |     |       |            |       |      |   |
| 44 |             |          |               |     |     |       |            |       |      |   |
| 45 |             |          |               |     |     |       |            |       |      |   |
| 46 |             |          |               |     |     |       |            |       |      |   |

|    |              |         |                                                                           |                     |                        |                                                                 |                                          |              |      |   |
|----|--------------|---------|---------------------------------------------------------------------------|---------------------|------------------------|-----------------------------------------------------------------|------------------------------------------|--------------|------|---|
| 1  |              |         |                                                                           |                     |                        |                                                                 |                                          |              |      |   |
| 2  |              |         |                                                                           |                     |                        |                                                                 |                                          |              |      |   |
| 3  | Polku et al. | Finland | prospective cohort study                                                  | n/a                 | n/a                    | 848                                                             | community-dwelling                       | 75-90        | 62.0 | X |
| 4  | (2015)       |         |                                                                           |                     |                        |                                                                 |                                          |              |      |   |
| 5  | Portegijs et | Finland | secondary analysis of a cross-sectional study (baseline data & follow-up) | n/a                 | n/a                    | 753                                                             | community-dwelling                       | 75-90        | 64.0 | X |
| 6  | al. (2016)   |         |                                                                           |                     |                        |                                                                 |                                          |              |      |   |
| 7  |              |         |                                                                           |                     |                        |                                                                 |                                          |              |      |   |
| 8  |              |         |                                                                           |                     |                        |                                                                 |                                          |              |      |   |
| 9  |              |         |                                                                           |                     |                        |                                                                 |                                          |              |      |   |
| 10 |              |         |                                                                           |                     |                        |                                                                 |                                          |              |      |   |
| 11 |              |         |                                                                           |                     |                        |                                                                 |                                          |              |      |   |
| 12 |              |         |                                                                           |                     |                        |                                                                 |                                          |              |      |   |
| 13 | Quail et al. | Canada  | secondary analysis of a population-based cohort study                     | n/a                 | n/a                    | 508                                                             | community-dwelling                       | 75-96        | 66.9 |   |
| 14 | (2007)       |         |                                                                           |                     |                        |                                                                 |                                          |              |      |   |
| 15 |              |         |                                                                           |                     |                        |                                                                 |                                          |              |      |   |
| 16 |              |         |                                                                           |                     |                        |                                                                 |                                          |              |      |   |
| 17 |              |         |                                                                           |                     |                        |                                                                 |                                          |              |      |   |
| 18 |              |         |                                                                           |                     |                        |                                                                 |                                          |              |      |   |
| 19 | Rantakokk    | Finland | secondary analysis of a cross-sectional study (baseline data)             | n/a                 | n/a                    | 847                                                             | community-dwelling                       | 75-90        | 62.0 | X |
| 20 | o et al.     |         |                                                                           |                     |                        |                                                                 |                                          |              |      |   |
| 21 | (2014)       |         |                                                                           |                     |                        |                                                                 |                                          |              |      |   |
| 22 |              |         |                                                                           |                     |                        |                                                                 |                                          |              |      |   |
| 23 |              |         |                                                                           |                     |                        |                                                                 |                                          |              |      |   |
| 24 |              |         |                                                                           |                     |                        |                                                                 |                                          |              |      |   |
| 25 |              |         |                                                                           |                     |                        |                                                                 |                                          |              |      |   |
| 26 |              |         |                                                                           |                     |                        |                                                                 |                                          |              |      |   |
| 27 | Rantakokk    | Finland | secondary analysis of a cross-sectional study (baseline data & follow-up) | n/a                 | n/a                    | 848 (baseline), 816 (1 year follow-up), 761 (2 years follow-up) | community-dwelling                       | 75-90        | 62.0 | X |
| 28 | o et al.     |         |                                                                           |                     |                        |                                                                 |                                          |              |      |   |
| 29 | (2016)       |         |                                                                           |                     |                        |                                                                 |                                          |              |      |   |
| 30 |              |         |                                                                           |                     |                        |                                                                 |                                          |              |      |   |
| 31 |              |         |                                                                           |                     |                        |                                                                 |                                          |              |      |   |
| 32 |              |         |                                                                           |                     |                        |                                                                 |                                          |              |      |   |
| 33 |              |         |                                                                           |                     |                        |                                                                 |                                          |              |      |   |
| 34 |              |         |                                                                           |                     |                        |                                                                 |                                          |              |      |   |
| 35 |              |         |                                                                           |                     |                        |                                                                 |                                          |              |      |   |
| 36 | Rantz et al. | USA     | secondary analysis of a cross-                                            | living with sensors | living without sensors | 133                                                             | residents of independent living facility | mean age: 83 | 64.7 | X |
| 37 | (2015)       |         |                                                                           |                     |                        |                                                                 |                                          |              |      |   |
| 38 |              |         |                                                                           |                     |                        |                                                                 |                                          |              |      |   |
| 39 |              |         |                                                                           |                     |                        |                                                                 |                                          |              |      |   |
| 40 |              |         |                                                                           |                     |                        |                                                                 |                                          |              |      |   |
| 41 |              |         |                                                                           |                     |                        |                                                                 |                                          |              |      |   |
| 42 |              |         |                                                                           |                     |                        |                                                                 |                                          |              |      |   |
| 43 |              |         |                                                                           |                     |                        |                                                                 |                                          |              |      |   |
| 44 |              |         |                                                                           |                     |                        |                                                                 |                                          |              |      |   |
| 45 |              |         |                                                                           |                     |                        |                                                                 |                                          |              |      |   |
| 46 |              |         |                                                                           |                     |                        |                                                                 |                                          |              |      |   |

1  
2  
3  
4  
5  
6  
7  
8  
9  
10  
11  
12  
13  
14  
15  
16  
17  
18  
19  
20  
21  
22  
23  
24  
25  
26  
27  
28  
29  
30  
31  
32  
33  
34  
35  
36  
37  
38  
39  
40  
41  
42  
43  
44  
45  
46

|                               |         |                                               |                                                                                                                                                                                                                                                                                                                                                   |                                                        |       |                    |                         |      |   |  |
|-------------------------------|---------|-----------------------------------------------|---------------------------------------------------------------------------------------------------------------------------------------------------------------------------------------------------------------------------------------------------------------------------------------------------------------------------------------------------|--------------------------------------------------------|-------|--------------------|-------------------------|------|---|--|
|                               |         | sectional study                               |                                                                                                                                                                                                                                                                                                                                                   |                                                        |       |                    |                         |      |   |  |
| Rao et al. (2016)             | Canada  | secondary analysis of a cross-sectional study | n/a                                                                                                                                                                                                                                                                                                                                               | n/a                                                    | 1,668 | community-dwelling | mean age: 82.9 (SD 6.9) | 58.0 | X |  |
| Rapo-Pylkko et al. (2016)     | Finland | cross-sectional study                         | n/a                                                                                                                                                                                                                                                                                                                                               | n/a                                                    | 106   | community-dwelling | 75-85                   | 74.0 | X |  |
| Rasinaho et al. (2006)        | Finland | cross-sectional study                         | n/a                                                                                                                                                                                                                                                                                                                                               | n/a                                                    | 645   | community-dwelling | 75-81                   | 74.3 |   |  |
| Richards & Rankaduwera (2008) | Canada  | cross-sectional study                         | n/a                                                                                                                                                                                                                                                                                                                                               | n/a                                                    | 722   | community-dwelling | ≥85                     | N/A  |   |  |
| Rydwik et al. (2010)          | Sweden  | RCT 24 month follow-up                        | 1) nutritional treatment (individual dietary counseling + 5 group sessions + general physical training advice)<br>2) physical training (regular physical group training of approx. 1h, twice a week for 12 weeks +general diet advice)<br>3) Training & nutrition (specific physical training & specific diet counseling/group session education) | general physical training advice & general diet advice | 96    | community-dwelling | ≥75                     | 60.4 | X |  |
| Rydwik et al. (2008)          | Sweden  | RCT                                           | 1) nutrition (diet counseling/group session                                                                                                                                                                                                                                                                                                       | general physical training advice & general diet advice | 96    | community-dwelling | ≥75                     | 60.4 | X |  |

For peer review only

1  
2  
3  
4  
5  
6  
7  
8  
9  
10  
11  
12  
13  
14  
15  
16  
17  
18  
19  
20  
21  
22  
23  
24  
25  
26  
27  
28  
29  
30  
31  
32  
33  
34  
35  
36  
37  
38  
39  
40  
41  
42  
43  
44  
45  
46

education + general physical training advice)  
2) training (specific physical training + general diet advice)  
3) Training & nutrition (specific physical training & specific diet counseling/group session education)

|    |                        |             |                                                                                             |                                                |                                                           |        |                                     |       |      |   |
|----|------------------------|-------------|---------------------------------------------------------------------------------------------|------------------------------------------------|-----------------------------------------------------------|--------|-------------------------------------|-------|------|---|
| 14 | Sabayan et al. (2012)  | Netherlands | population-based prospective follow-up study with cross-sectional and longitudinal analyses | n/a                                            | n/a                                                       | 572    | community-dwelling                  | ≥85   | 66.8 | X |
| 24 | Sallinen et al. (2015) | Finland     | qualitative study using thematic interviews and theory-driven content analysis              | n/a                                            | n/a                                                       | 12     | residents of service houses         | 80-92 | 75.0 |   |
| 32 | Sampson et al. (2009)  | UK          | prospective cohort study                                                                    | n/a                                            | n/a                                                       | 10,720 | community-dwelling                  | ≥75   | 59.6 | X |
| 35 | Savikko et al. (2010)  | Finland     | cross-sectional study within an RCT                                                         | psychosocial group rehabilitation intervention | not named (participants were not considered for analysis) | 117    | community-dwelling and residents of | 75-92 | 74.0 | X |

|    |             |           |                 |                             |            |                |                |                 |      |   |
|----|-------------|-----------|-----------------|-----------------------------|------------|----------------|----------------|-----------------|------|---|
| 1  |             |           |                 |                             |            |                |                |                 |      |   |
| 2  |             |           |                 |                             |            |                |                |                 |      |   |
| 3  |             |           |                 |                             |            |                |                |                 |      |   |
| 4  |             |           |                 |                             |            |                |                | independent     |      |   |
| 5  |             |           |                 |                             |            |                |                | living facility |      |   |
| 6  | Sixsmith et | Hungary,  | qualitative     | n/a                         | n/a        | 190            | community-     | 75-89           | 61.6 | X |
| 7  | al. (2014)  | Latvia,   | study using in- |                             |            |                | dwelling       |                 |      |   |
| 8  |             | United    | depth, semi-    |                             |            |                |                |                 |      |   |
| 9  |             | Kingdom,  | structured      |                             |            |                |                |                 |      |   |
| 10 |             | Germany,  | interviews and  |                             |            |                |                |                 |      |   |
| 11 |             | and       | grounded        |                             |            |                |                |                 |      |   |
| 12 |             | Sweden    | theory          |                             |            |                |                |                 |      |   |
| 13 | Thompson    | USA       | cross-          | n/a                         | n/a        | 27             | inhabitants of | 78-94           | 67.0 | X |
| 14 | et al.      |           | sectional       |                             |            |                | an             |                 |      |   |
| 15 | (2011)      |           | study           |                             |            |                | independent    |                 |      |   |
| 16 |             |           |                 |                             |            |                | retirement     |                 |      |   |
| 17 |             |           |                 |                             |            |                | community      |                 |      |   |
| 18 |             |           |                 |                             |            |                |                |                 |      |   |
| 19 | Tsai et al. | Finland   | cross-          | n/a                         | n/a        | 174            | community-     | 75-90           | 64.0 | X |
| 20 | (2015)      |           | sectional       |                             |            |                | dwelling       |                 |      |   |
| 21 |             |           | study           |                             |            |                |                |                 |      |   |
| 22 |             |           |                 |                             |            |                |                |                 |      |   |
| 23 | Tsai et al. | Finland   | cross-          | n/a                         | n/a        | 657            | community-     | 75-81           | 75.0 | X |
| 24 | (2013)      |           | sectional       |                             |            |                | dwelling       |                 |      |   |
| 25 |             |           | study           |                             |            |                |                |                 |      |   |
| 26 |             |           |                 |                             |            |                |                |                 |      |   |
| 27 | Van         | Netherlan | prospective     | n/a                         | n/a        | 277            | community-     | ≥85             | 72.6 | X |
| 28 | Bemmel et   | ds        | population-     |                             |            |                | dwelling       |                 |      |   |
| 29 | al. (2010)  |           | based study     |                             |            |                |                |                 |      |   |
| 30 |             |           |                 |                             |            |                |                |                 |      |   |
| 31 | van         | Netherlan | cluster RCT     | care plan for people with a | usual care | 2,681          | community-     | ≥75             | 68.3 | X |
| 32 | Houweling   | ds        |                 | combination of problems at  |            | (baseline)     | dwelling       |                 |      |   |
| 33 | et al.      |           |                 | the functional, somatic,    |            | 2,172 (follow- |                |                 |      |   |
| 34 | (2015)      |           |                 | mental, or social level     |            | up)            |                |                 |      |   |
| 35 |             |           |                 |                             |            |                |                |                 |      |   |
| 36 | Vasara      | Finland   | qualitative     | n/a                         | n/a        | 14             | community      | 78-88           | 64.3 |   |
| 37 | (2015)      |           | study using     |                             |            |                | dwelling       |                 |      |   |
| 38 |             |           | semi-           |                             |            |                |                |                 |      |   |
| 39 |             |           | structured      |                             |            |                |                |                 |      |   |
| 40 |             |           | storylines and  |                             |            |                |                |                 |      |   |
| 41 |             |           |                 |                             |            |                |                |                 |      |   |
| 42 |             |           |                 |                             |            |                |                |                 |      |   |
| 43 |             |           |                 |                             |            |                |                |                 |      |   |
| 44 |             |           |                 |                             |            |                |                |                 |      |   |
| 45 |             |           |                 |                             |            |                |                |                 |      |   |
| 46 |             |           |                 |                             |            |                |                |                 |      |   |



|    |                     |           |                                                                     |                                                                                         |                          |     |                      |                          |       |   |
|----|---------------------|-----------|---------------------------------------------------------------------|-----------------------------------------------------------------------------------------|--------------------------|-----|----------------------|--------------------------|-------|---|
| 1  |                     |           |                                                                     |                                                                                         |                          |     |                      |                          |       |   |
| 2  |                     |           |                                                                     |                                                                                         |                          |     |                      |                          |       |   |
| 3  |                     |           | narrative                                                           |                                                                                         |                          |     |                      |                          |       |   |
| 4  |                     |           | analysis                                                            |                                                                                         |                          |     |                      |                          |       |   |
| 5  |                     |           |                                                                     |                                                                                         |                          |     |                      |                          |       |   |
| 6  | Vestergaard et al.  | Denmark   | RCT                                                                 | home-based video exercises; 26min/day; 3 times/week; 5 months; bi-weekly telephone call | bi-weekly telephone call | 53  | community-dwelling   | 75-91                    | 100.0 | X |
| 7  |                     |           |                                                                     |                                                                                         |                          |     |                      |                          |       |   |
| 8  | (2008)              |           |                                                                     |                                                                                         |                          |     |                      |                          |       |   |
| 9  |                     |           |                                                                     |                                                                                         |                          |     |                      |                          |       |   |
| 10 | Von Humboldt & Leal | Portugal  | qualitative study using interviews and qualitative content analysis | n/a                                                                                     | n/a                      | 152 | community-dwelling   | 75-102                   | 61.2  |   |
| 11 |                     |           |                                                                     |                                                                                         |                          |     |                      |                          |       |   |
| 12 | (2015)              |           |                                                                     |                                                                                         |                          |     |                      |                          |       |   |
| 13 |                     |           |                                                                     |                                                                                         |                          |     |                      |                          |       |   |
| 14 |                     |           |                                                                     |                                                                                         |                          |     |                      |                          |       |   |
| 15 |                     |           |                                                                     |                                                                                         |                          |     |                      |                          |       |   |
| 16 |                     |           |                                                                     |                                                                                         |                          |     |                      |                          |       |   |
| 17 | Wang et al.         | Australia | cross-sectional study                                               | n/a                                                                                     | n/a                      | 81  | community-dwelling   | mean age: 83.8 (SD 3.83) | 44.4  |   |
| 18 | (2017)              |           |                                                                     |                                                                                         |                          |     |                      |                          |       |   |
| 19 |                     |           |                                                                     |                                                                                         |                          |     |                      |                          |       |   |
| 20 |                     |           |                                                                     |                                                                                         |                          |     |                      |                          |       |   |
| 21 |                     |           |                                                                     |                                                                                         |                          |     |                      |                          |       |   |
| 22 |                     |           |                                                                     |                                                                                         |                          |     |                      |                          |       |   |
| 23 | Werth et al.        | Australia | retrospective cross-sectional survey study                          | n/a                                                                                     | n/a                      | 239 | community-dwelling   | ≥76                      | 60.7  |   |
| 24 | (2017)              |           |                                                                     |                                                                                         |                          |     |                      |                          |       |   |
| 25 |                     |           |                                                                     |                                                                                         |                          |     |                      |                          |       |   |
| 26 |                     |           |                                                                     |                                                                                         |                          |     |                      |                          |       |   |
| 27 | Williams et al.     | Australia | cross-sectional study                                               | n/a                                                                                     | n/a                      | 546 | community-dwelling   | 75-96                    | 68.0  | X |
| 28 | (2007)              |           |                                                                     |                                                                                         |                          |     |                      |                          |       |   |
| 29 |                     |           |                                                                     |                                                                                         |                          |     |                      |                          |       |   |
| 30 |                     |           |                                                                     |                                                                                         |                          |     |                      |                          |       |   |
| 31 | Wilson et al.       | UK        | cross-sectional study                                               | n/a                                                                                     | n/a                      | 242 | community-dwelling   | 80-90                    | 69.9  | X |
| 32 | (2007)              |           |                                                                     |                                                                                         |                          |     |                      |                          |       |   |
| 33 |                     |           |                                                                     |                                                                                         |                          |     |                      |                          |       |   |
| 34 |                     |           |                                                                     |                                                                                         |                          |     |                      |                          |       |   |
| 35 | Wong et al.         | Canada    | cross-sectional study                                               | n/a                                                                                     | n/a                      | 740 | community-dwelling   | 75-96                    | 68.0  |   |
| 36 | (2010)              |           |                                                                     |                                                                                         |                          |     |                      |                          |       |   |
| 37 |                     |           |                                                                     |                                                                                         |                          |     |                      |                          |       |   |
| 38 | Young               | USA       | prospective cohort study                                            | n/a                                                                                     | n/a                      | 298 | people living in the | 75-94                    | 69.1  | X |
| 39 | (2009)              |           |                                                                     |                                                                                         |                          |     |                      |                          |       |   |
| 40 |                     |           |                                                                     |                                                                                         |                          |     |                      |                          |       |   |
| 41 |                     |           |                                                                     |                                                                                         |                          |     |                      |                          |       |   |
| 42 |                     |           |                                                                     |                                                                                         |                          |     |                      |                          |       |   |
| 43 |                     |           |                                                                     |                                                                                         |                          |     |                      |                          |       |   |
| 44 |                     |           |                                                                     |                                                                                         |                          |     |                      |                          |       |   |
| 45 |                     |           |                                                                     |                                                                                         |                          |     |                      |                          |       |   |
| 46 |                     |           |                                                                     |                                                                                         |                          |     |                      |                          |       |   |

1  
2  
3  
4  
5  
6  
7  
8  
9  
10  
11  
12  
13  
14  
15  
16  
17  
18  
19  
20  
21  
22  
23  
24  
25  
26  
27  
28  
29  
30  
31  
32  
33  
34  
35  
36  
37  
38  
39  
40  
41  
42  
43  
44  
45  
46

|                        |     |                            |     |     |  |        |                                                                   |     |      |
|------------------------|-----|----------------------------|-----|-----|--|--------|-------------------------------------------------------------------|-----|------|
|                        |     |                            |     |     |  |        | independent living unit of a continuing care retirement community |     |      |
| Zingmond et al. (2011) | USA | retrospective cohort study | n/a | n/a |  | 21,310 | community-dwelling                                                | ≥75 | 78.0 |

Note. n/a = not applicable, N/A = not available

For peer review only

## Preferred Reporting Items for Systematic reviews and Meta-Analyses extension for Scoping Reviews (PRISMA-ScR) Checklist

| SECTION                                               | ITEM | PRISMA-ScR CHECKLIST ITEM                                                                                                                                                                                                                                                                                  | REPORTED ON PAGE # |
|-------------------------------------------------------|------|------------------------------------------------------------------------------------------------------------------------------------------------------------------------------------------------------------------------------------------------------------------------------------------------------------|--------------------|
| <b>TITLE</b>                                          |      |                                                                                                                                                                                                                                                                                                            |                    |
| Title                                                 | 1    | Identify the report as a scoping review.                                                                                                                                                                                                                                                                   | p.2                |
| <b>ABSTRACT</b>                                       |      |                                                                                                                                                                                                                                                                                                            |                    |
| Structured summary                                    | 2    | Provide a structured summary that includes (as applicable): background, objectives, eligibility criteria, sources of evidence, charting methods, results, and conclusions that relate to the review questions and objectives.                                                                              | p.3                |
| <b>INTRODUCTION</b>                                   |      |                                                                                                                                                                                                                                                                                                            |                    |
| Rationale                                             | 3    | Describe the rationale for the review in the context of what is already known. Explain why the review questions/objectives lend themselves to a scoping review approach.                                                                                                                                   | p.4-5              |
| Objectives                                            | 4    | Provide an explicit statement of the questions and objectives being addressed with reference to their key elements (e.g., population or participants, concepts, and context) or other relevant key elements used to conceptualize the review questions and/or objectives.                                  | p.5, l.46-50       |
| <b>METHODS</b>                                        |      |                                                                                                                                                                                                                                                                                                            |                    |
| Protocol and registration                             | 5    | Indicate whether a review protocol exists; state if and where it can be accessed (e.g., a Web address); and if available, provide registration information, including the registration number.                                                                                                             | p.6, l.8-10        |
| Eligibility criteria                                  | 6    | Specify characteristics of the sources of evidence used as eligibility criteria (e.g., years considered, language, and publication status), and provide a rationale.                                                                                                                                       | p.6-7              |
| Information sources*                                  | 7    | Describe all information sources in the search (e.g., databases with dates of coverage and contact with authors to identify additional sources), as well as the date the most recent search was executed.                                                                                                  | p.7, l.27-40       |
| Search                                                | 8    | Present the full electronic search strategy for at least 1 database, including any limits used, such that it could be repeated.                                                                                                                                                                            | Appendix A         |
| Selection of sources of evidence†                     | 9    | State the process for selecting sources of evidence (i.e., screening and eligibility) included in the scoping review.                                                                                                                                                                                      | p.7-8              |
| Data charting process‡                                | 10   | Describe the methods of charting data from the included sources of evidence (e.g., calibrated forms or forms that have been tested by the team before their use, and whether data charting was done independently or in duplicate) and any processes for obtaining and confirming data from investigators. | p.8-9              |
| Data items                                            | 11   | List and define all variables for which data were sought and any assumptions and simplifications made.                                                                                                                                                                                                     | p.8, l.39-50       |
| Critical appraisal of individual sources of evidence§ | 12   | If done, provide a rationale for conducting a critical appraisal of included sources of evidence; describe the methods used and how this information was used in any data synthesis (if appropriate).                                                                                                      | p.8                |

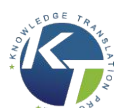

| SECTION                                       | ITEM | PRISMA-ScR CHECKLIST ITEM                                                                                                                                                                       | REPORTED ON PAGE # |
|-----------------------------------------------|------|-------------------------------------------------------------------------------------------------------------------------------------------------------------------------------------------------|--------------------|
| Synthesis of results                          | 13   | Describe the methods of handling and summarizing the data that were charted.                                                                                                                    | p.9-10             |
| <b>RESULTS</b>                                |      |                                                                                                                                                                                                 |                    |
| Selection of sources of evidence              | 14   | Give numbers of sources of evidence screened, assessed for eligibility, and included in the review, with reasons for exclusions at each stage, ideally using a flow diagram.                    | p.10 and figure 1  |
| Characteristics of sources of evidence        | 15   | For each source of evidence, present characteristics for which data were charted and provide the citations.                                                                                     | Appendix C         |
| Critical appraisal within sources of evidence | 16   | If done, present data on critical appraisal of included sources of evidence (see item 12).                                                                                                      | n/a                |
| Results of individual sources of evidence     | 17   | For each included source of evidence, present the relevant data that were charted that relate to the review questions and objectives.                                                           | p.11-12 (table 1)  |
| Synthesis of results                          | 18   | Summarize and/or present the charting results as they relate to the review questions and objectives.                                                                                            | p.10-17            |
| <b>DISCUSSION</b>                             |      |                                                                                                                                                                                                 |                    |
| Summary of evidence                           | 19   | Summarize the main results (including an overview of concepts, themes, and types of evidence available), link to the review questions and objectives, and consider the relevance to key groups. | p.17-19 + 20-21    |
| Limitations                                   | 20   | Discuss the limitations of the scoping review process.                                                                                                                                          | p.19-20            |
| Conclusions                                   | 21   | Provide a general interpretation of the results with respect to the review questions and objectives, as well as potential implications and/or next steps.                                       | p.21               |
| <b>FUNDING</b>                                |      |                                                                                                                                                                                                 |                    |
| Funding                                       | 22   | Describe sources of funding for the included sources of evidence, as well as sources of funding for the scoping review. Describe the role of the funders of the scoping review.                 | p.22               |

JBI = Joanna Briggs Institute; PRISMA-ScR = Preferred Reporting Items for Systematic reviews and Meta-Analyses extension for Scoping Reviews.

\* Where *sources of evidence* (see second footnote) are compiled from, such as bibliographic databases, social media platforms, and Web sites.

† A more inclusive/heterogeneous term used to account for the different types of evidence or data sources (e.g., quantitative and/or qualitative research, expert opinion, and policy documents) that may be eligible in a scoping review as opposed to only studies. This is not to be confused with *information sources* (see first footnote).

‡ The frameworks by Arksey and O'Malley (6) and Levac and colleagues (7) and the JBI guidance (4, 5) refer to the process of data extraction in a scoping review as data charting.

§ The process of systematically examining research evidence to assess its validity, results, and relevance before using it to inform a decision. This term is used for items 12 and 19 instead of "risk of bias" (which is more applicable to systematic reviews of interventions) to include and acknowledge the various sources of evidence that may be used in a scoping review (e.g., quantitative and/or qualitative research, expert opinion, and policy document).

From: Tricco AC, Lillie E, Zarin W, O'Brien KK, Colquhoun H, Levac D, et al. PRISMA Extension for Scoping Reviews (PRISMA-ScR): Checklist and Explanation. *Ann Intern Med.* 2018;169:467–473. doi: 10.7326/M18-0850.

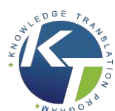

# BMJ Open

**Laying the foundation for a Core Set of the International Classification of Functioning, Disability and Health for community-dwelling older adults in primary care: Relevant categories of their functioning from the research perspective. A scoping review**

|                                 |                                                                                                                                                                                                                                                                                                                                                                                                                                                                                                                                                                                                                                                                                                                                                                                                                                                                                                                                                                                                                                                     |
|---------------------------------|-----------------------------------------------------------------------------------------------------------------------------------------------------------------------------------------------------------------------------------------------------------------------------------------------------------------------------------------------------------------------------------------------------------------------------------------------------------------------------------------------------------------------------------------------------------------------------------------------------------------------------------------------------------------------------------------------------------------------------------------------------------------------------------------------------------------------------------------------------------------------------------------------------------------------------------------------------------------------------------------------------------------------------------------------------|
| Journal:                        | <i>BMJ Open</i>                                                                                                                                                                                                                                                                                                                                                                                                                                                                                                                                                                                                                                                                                                                                                                                                                                                                                                                                                                                                                                     |
| Manuscript ID                   | bmjopen-2020-037333.R2                                                                                                                                                                                                                                                                                                                                                                                                                                                                                                                                                                                                                                                                                                                                                                                                                                                                                                                                                                                                                              |
| Article Type:                   | Original research                                                                                                                                                                                                                                                                                                                                                                                                                                                                                                                                                                                                                                                                                                                                                                                                                                                                                                                                                                                                                                   |
| Date Submitted by the Author:   | 26-Oct-2020                                                                                                                                                                                                                                                                                                                                                                                                                                                                                                                                                                                                                                                                                                                                                                                                                                                                                                                                                                                                                                         |
| Complete List of Authors:       | Tomandl, Johanna; Friedrich-Alexander University Erlangen-Nuremberg, Institute of General Practice<br>Heinmüller, Stefan; Friedrich-Alexander University Erlangen-Nuremberg, Institute of General Practice<br>Selb, Melissa; ICF Research Branch, Swiss Paraplegic Research<br>Graessel, Elmar; Friedrich-Alexander University Erlangen-Nuremberg, Center for Health Services Research in Medicine, Department of Psychiatry and Psychotherapy<br>Freiberger, Ellen; Friedrich-Alexander University Erlangen-Nuremberg, Institute for Biomedicine of Aging<br>Kühlein, Thomas ; Friedrich-Alexander University Erlangen-Nuremberg, Institute of General Practice<br>Hueber, Susann; Friedrich-Alexander University Erlangen-Nuremberg, Institute of General Practice<br>Book, Stephanie; Friedrich-Alexander University Erlangen-Nuremberg, Center for Health Services Research in Medicine, Department of Psychiatry and Psychotherapy<br>Gothardt, Susann; Friedrich-Alexander University Erlangen-Nuremberg, Institute for Biomedicine of Ageing |
| <b>Primary Subject Heading</b>: | Geriatric medicine                                                                                                                                                                                                                                                                                                                                                                                                                                                                                                                                                                                                                                                                                                                                                                                                                                                                                                                                                                                                                                  |
| Secondary Subject Heading:      | General practice / Family practice                                                                                                                                                                                                                                                                                                                                                                                                                                                                                                                                                                                                                                                                                                                                                                                                                                                                                                                                                                                                                  |
| Keywords:                       | GENERAL MEDICINE (see Internal Medicine), GERIATRIC MEDICINE, PRIMARY CARE                                                                                                                                                                                                                                                                                                                                                                                                                                                                                                                                                                                                                                                                                                                                                                                                                                                                                                                                                                          |
|                                 |                                                                                                                                                                                                                                                                                                                                                                                                                                                                                                                                                                                                                                                                                                                                                                                                                                                                                                                                                                                                                                                     |

SCHOLARONE™  
Manuscripts

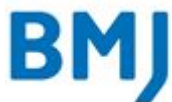

I, the Submitting Author has the right to grant and does grant on behalf of all authors of the Work (as defined in the below author licence), an exclusive licence and/or a non-exclusive licence for contributions from authors who are: i) UK Crown employees; ii) where BMJ has agreed a CC-BY licence shall apply, and/or iii) in accordance with the terms applicable for US Federal Government officers or employees acting as part of their official duties; on a worldwide, perpetual, irrevocable, royalty-free basis to BMJ Publishing Group Ltd ("BMJ") its licensees and where the relevant Journal is co-owned by BMJ to the co-owners of the Journal, to publish the Work in this journal and any other BMJ products and to exploit all rights, as set out in our [licence](#).

The Submitting Author accepts and understands that any supply made under these terms is made by BMJ to the Submitting Author unless you are acting as an employee on behalf of your employer or a postgraduate student of an affiliated institution which is paying any applicable article publishing charge ("APC") for Open Access articles. Where the Submitting Author wishes to make the Work available on an Open Access basis (and intends to pay the relevant APC), the terms of reuse of such Open Access shall be governed by a Creative Commons licence – details of these licences and which [Creative Commons](#) licence will apply to this Work are set out in our licence referred to above.

Other than as permitted in any relevant BMJ Author's Self Archiving Policies, I confirm this Work has not been accepted for publication elsewhere, is not being considered for publication elsewhere and does not duplicate material already published. I confirm all authors consent to publication of this Work and authorise the granting of this licence.

1  
2  
3 **Laying the foundation for a Core Set of the International Classification of Functioning,**  
4 **Disability and Health for community-dwelling older adults in primary care: Relevant**  
5 **categories of their functioning from the research perspective. A scoping review**  
6  
7  
8  
9

10 Johanna Tomandl (0000-0001-5571-421X)<sup>a</sup>

11  
12 Stefan Heinmüller (0000-0002-7997-7871)<sup>a</sup>

13  
14 Melissa Selb<sup>b</sup>

15  
16 Elmar Graessel<sup>c</sup>

17  
18 Ellen Freiburger<sup>d</sup>

19  
20 Thomas Kühlein<sup>a</sup>

21  
22 Susann Hueber<sup>a</sup>

23  
24 Stephanie Book(0000-0002-7120-4022)<sup>c\*</sup>

25  
26 Susann Gotthardt<sup>d\*</sup>

27  
28 \* SB and SG contributed equally to this work.

29  
30  
31  
32  
33 <sup>a</sup> Friedrich-Alexander-Universität Erlangen-Nürnberg (FAU), Institute of General Practice,  
34 Universitätsstraße 29, 91054 Erlangen, Germany

35  
36 <sup>b</sup> ICF Research Branch, a cooperation partner within the WHO Collaborating Center for the  
37 Family of International Classifications in Germany (at DIMDI), Nottwil, Switzerland / Swiss  
38 Paraplegic Research, Nottwil, Switzerland

39  
40 <sup>c</sup> Center for Health Services Research in Medicine, Department of Psychiatry and  
41 Psychotherapy, Friedrich-Alexander-Universität Erlangen-Nürnberg (FAU), Schwabachanlage  
42 10, 91054 Erlangen, Germany

43  
44 <sup>d</sup> Friedrich-Alexander-Universität Erlangen-Nürnberg (FAU), Institute for Biomedicine of Aging,  
45 Kobergerstraße 60, 90408 Nuremberg, Germany

46 **Corresponding Author:**

47 Johanna Tomandl  
48 Friedrich-Alexander-Universität Erlangen-Nürnberg (FAU)  
49 Institute of General Practice  
50 Universitätsstraße 29, 91054 Erlangen, Germany  
51 E-Mail: [johanna.tomandl@gmail.com](mailto:johanna.tomandl@gmail.com)  
52 Tel.: 004991318545761  
53

54  
55  
56 **Word count: 3.989**  
57  
58  
59  
60

## Abstract

**Objectives:** The objective of this study was to find relevant concepts of functioning in community-dwelling older adults within frequently used assessment instruments published in the scientific literature. This was part of a larger project to develop an International Classification of Functioning, Disability and Health (ICF) Core Set for use in primary care.

**Design:** A scoping review was conducted. Articles dealing with functioning in older adults were searched and assessed for eligibility. The study population included community-dwelling adults ( $\geq 75$  years) without dementia, living in high-resources countries. Relevant concepts were extracted from assessment instruments and linked to the ICF using standardized linking rules. Finally, a frequency analysis was conducted.

**Setting:** Home, primary care.

**Participants:** Community-dwelling adults aged 75 years and above.

**Results:** From 5,060 identified publications 68 were included and 30 assessment instruments extracted. Overall, 1,182 concepts were retrieved. Most were linked to the 'activities and participation' component. The most frequently identified categories were '*memory functions*', '*dressings*', and '*changing basic body position*'.

**Conclusions:** This review provides a list of relevant ICF categories from the research perspective that will be used for developing an ICF Core Set for older primary care patients.

**Trial registration number:** PROSPERO (CRD42017067784), *Versorgungsforschung Deutschland Datenbank* [VfD\_17\_003833] and *clinicaltrials.gov* [NCT03384732].

**Keywords:** International Classification of Functioning, Disability and Health, community-dwelling older adults, geriatric health services, primary care



# 1 Article Summary

## 1.1 Strengths and limitations

- A broad literature search was performed in five key medical and social databases.
- This review encompassed a broad spectrum of studies, including mainly cross-sectional and longitudinal studies as well as randomized controlled trials, but also two qualitative and one mixed method study.
- Restricting the search to articles published in English or German in specific high-resources countries and drawing a random sample for full text screening carries the risk of losing potentially relevant publications.
- Excluding studies that focus solely on body structures may have introduced some bias in the results.

## 2 Introduction

The increasing average life expectancy is accompanied by an increasing prevalence of chronic diseases(1, 2). A blurring between the boundaries of diseases, risk factors and physiological aging processes can be observed(3, 4). In general practices in Germany the prevalence of multimorbidity in patients over the age of 60 is around 85%(5). Multimorbidity is a mostly disease-based concept, which is mainly being responded to pharmaceutically. The prevalence of polypharmacy in general practices in Germany is around 37%(5). Inappropriate polypharmacy can lead to adverse drug events, increased risk for fractures, hospitalization, or even death(6, 7) To address this issue of inappropriate polypharmacy, there is a need for new strategies (e. g. functioning information in the consultation) that consider the complexity of health in older adults. With increasing age, problems in functioning become a strong predictor of mortality and provide important information about the consequences of chronic conditions(8, 9). Making aware of these functioning problems might help shift the medical gaze towards problems and answers more rooted in the patients' lived experience of health, ultimately helping to better balance medical decisions. As general practitioners are the primary contact

1  
2  
3 for community-dwelling patients, they could play an important role in advancing the paradigm  
4 change from a disease-based to a biopsychosocial view.  
5  
6

7  
8 *Functioning* can be defined as the outcome of interactions between a person's health  
9 conditions and contextual factors(10). It can be described using the international standard and  
10 classification system for describing functioning and health, the International Classification of  
11 Functioning, Disability and Health (ICF). With more than 1,400 categories, it is, however, too  
12 extensive to be used in daily practice. Thus, shorter lists of categories, so-called ICF Core Sets  
13 (ICF-CS), have been developed for several health conditions.<sup>1</sup> They comprise categories  
14 relevant to persons living with a specific condition(11). An ICF-CS for geriatric patients in early  
15 post-acute rehabilitation was developed in 2005(12). As target group and aims of rehabilitation  
16 can differ from that of general medicine, the categories included in this ICF-CS may likewise  
17 be different from an ICF-CS for geriatric patients in primary care. Two other ICF-CS, one for  
18 primary care and one for geriatric patients, have been developed in the Netherlands(13-15).  
19 Though they might turn out to be applicable to our study population, they were developed using  
20 methods other than the established multi-perspective methodology for developing ICF-CS,  
21 leaving out either the perspective of the target group or the researchers. For this reason, we  
22 aimed to develop an ICF-CS for community-dwelling adults ( $\geq 75$  years) for use in primary  
23 care, following the standardized process of the ICF Research Branch(11). This process  
24 includes a preparatory phase followed by a consensus conference. During the preparatory  
25 phase, four studies are conducted to identify relevant ICF categories: a systematic or scoping  
26 review (research perspective), a qualitative study (perspective of the target population)(16), an  
27 expert survey (experts' perspective), and an empirical study (clinical perspective)(17). To gain  
28 a comprehensive understanding of functioning, it is important to capture all four perspectives.  
29  
30  
31  
32  
33  
34  
35  
36  
37  
38  
39  
40  
41  
42  
43  
44  
45  
46  
47  
48  
49  
50  
51

52 The scoping review reflects the research perspective in that it aims to identify aspects of  
53 functioning that are described or evaluated in the scientific literature related to the health  
54 condition of interest(11). In this paper, methods and results of the scoping review are  
55 presented. The objective was to identify concepts of functioning in community-dwelling older  
56  
57  
58  
59  
60

1  
2  
3 adults considered relevant in frequently used assessment instruments published in the  
4 scientific literature.  
5  
6  
7

### 8 **3 Methods**

9

10  
11 This scoping review was conducted following the methodology proposed by the ICF Research  
12 Branch(11).<sup>2</sup> This methodology is composed of five steps: 1) literature search, 2) study  
13 selection, 3) extraction of relevant concepts, 4) linkage of the concepts to the ICF and 5)  
14 frequency analysis. We did not aim to answer clinical questions by reviewing existing evidence,  
15 but to systematically extract the concepts used by the scientific community to operationalize  
16 functioning related to community-dwelling older adults. A study protocol has been published  
17 elsewhere(18). This review was registered in PROSPERO (CRD42017067784) on 07/10/2017  
18 and is reported according to the Preferred Reporting Items for Systematic Reviews and Meta-  
19 Analyses extension for scoping reviews (PRISMA-ScR) guideline(19).  
20  
21  
22  
23  
24  
25  
26  
27  
28  
29

#### 30 **3.1 Eligibility Criteria**

31

32  
33 The selection of the eligibility criteria was guided by the PICOS (Population, Intervention,  
34 Comparison, Outcomes, Study design) framework(20). Due to the special focus of this review,  
35 only the 'P', 'O', and 'S' were relevant for our search.  
36  
37  
38

39 Population: For a publication to be included in this review, all the participants included in the  
40 published study had to be community-dwelling and at least 75 years old. Studies that included  
41 institutionalized participants (e.g. nursing home), participants recruited in a hospital or  
42 rehabilitation center, or participants with dementia were excluded. As the intended ICF-CS is  
43 meant to be used in primary care practices in Germany, only studies conducted in high-  
44 resources countries with a similar socio-economic and cultural background were considered.  
45  
46  
47  
48  
49  
50  
51  
52  
53  
54  
55  
56  
57  
58  
59  
60  
60

1  
2  
3 represent the needs of other community-dwelling older adults not suffering from the particular  
4 disease.  
5

6  
7 Outcomes: The publications had to be related to functioning as defined by the ICF (e.g.  
8 activities of daily living, social interaction, physical mobility). Publications reporting on studies  
9 that solely focused on body structures without considering any other features of functioning  
10 were excluded. Since physicians tend to focus on physical aspects of health anyway, and the  
11 final ICF-CS is meant to complement this traditional emphasis on physical structures and  
12 processes with few categories as necessary (for reasons of feasibility), we decided to forego  
13 body structures to ensure that the resulting ICF-CS reflects those components of the ICF that  
14 are not yet in the focus of general physicians.  
15

16  
17 Study design: As suggested in the ICF-CS development guidelines, randomized controlled  
18 trials, clinical controlled trials, cross-sectional studies, observational studies and qualitative  
19 studies were included(11). Study protocols, case studies, economic evaluation studies,  
20 conference papers, psychometric studies, prevention studies, studies of phase-II clinical trials,  
21 studies exclusively showing laboratory parameters, animal experiments, letters, comments  
22 and editorials were excluded, as those publications usually do not include relevant information  
23 on functioning(11). Furthermore, systematic reviews and meta-analyses were not included in  
24 this review.  
25  
26  
27  
28  
29  
30  
31  
32  
33  
34  
35  
36  
37  
38  
39  
40

### 41 **3.2 Literature search**

42  
43 Electronic searches were carried out in PubMed, PsycINFO, EMBASE, CINAHL und Scopus  
44 to identify potentially relevant publications. The search terms were organized into population  
45 (e.g. aged, elderly, older adults), living condition (e.g. community-dwelling, independently  
46 living) and outcome variables according to the ICF-related terms (e.g. social life, self-care,  
47 home environment) using the thesaurus of the respective database (e.g. Medical subject  
48 headings in PubMed) as well as free text words. Only studies published between 2007 and  
49 2017 in peer-reviewed journals in English or German were considered for inclusion. The search  
50 strategy was reviewed by an experienced librarian. The whole search strategy is available in  
51 Appendix A.  
52  
53  
54  
55  
56  
57  
58  
59  
60

### 3.3 Study selection

The publications found in the databases were exported to a review manager (Covidence). After removing duplicates, five researchers (JT/SHe/SG/SB/EF) performed a title and abstract screening based on the predefined eligibility criteria. Title and abstract of each publication were screened by two researchers independently. As an overwhelming number of publications were identified for the full text screening, a random sample was drawn to ensure manageability. As the purpose of this review was not to answer clinical questions by evaluating existing evidence, but only to systematically identify relevant concepts of functioning, drawing a random sample was possible. This procedure has already been applied in previous ICF-CS development projects(21-24) and is also recommended in the guidelines(11). It was decided that a random sample, containing 50% of all publications, should be included for full text screening. The random sample was drawn using the Random Integer Set Generator(25). The full texts were screened by four independent researchers (one half by JT and SHe and the other half by SG and SB) based on the predefined inclusion and exclusion criteria. Results were compared and any disagreement was solved in discussion with all four researchers.

### 3.4 Assessment of study quality

As the purpose of this review was to systematically identify relevant concepts of functioning and not to assess the effectiveness of certain interventions, a quality assessment of the studies was considered unnecessary. Nevertheless, only studies that were published in peer-reviewed scientific journals were included for analysis. Thus, the publications have assumingly undergone a level of quality control.

### 3.5 Data extraction

Following the PICOS scheme, the following data were extracted from the publications:

- Population: age, gender, sample size, type of sample (e.g. community-dwelling or residents of independent living facilities)
- Intervention (if applicable)
- Control (if applicable)

- Outcomes: concepts identified in instruments for assessing functioning
- Study design

Other data extracted were author, title, year and country. Following the methodology applied in other ICF-CS development projects, it was decided to focus on assessment instruments, as they provide a standardized and systematic basis for further analysis (26-29). "A concept was defined as a single health aspect or a personal (internal) or environmental (external) factor with an impact on health. Formally, a concept could consist of a single word or a set of words"(30). Examples for concepts are living arrangements, social embeddedness or walking. Assessment instruments were defined as any kind of standardized outcome measure (e.g. questionnaires, clinical tests) used in the study. Disagreement between the two researchers regarding the extracted data was solved by discussion. When consensus between the two could not be reached, a third researcher was consulted.

### 3.6 Data synthesis

Assessment instruments that were not available in the respective publications were accessed either through the internet or by contacting the authors of the included publications. Following the method of other ICF-CS development projects, only assessment instruments used in at least two different studies were considered(31, 32). To give an overview of the identified assessment instruments, they were categorized according to their thematic focus based on the terminology used in the ICF. The items and response options of each assessment instrument were listed on one table. Subsequently, meaningful concepts contained within each item or response option were extracted. The concepts were linked to ICF categories by four independent researchers (one half by JT and SHe and the other half by SG and SB) using established linking rules(33). Concepts that were too broad to be linked to one specific ICF category or a combination of ICF categories were coded as 'not definable' (nd), implying that the concept belongs to the universe of the ICF, but a decision about the most precise ICF category could not be made(33). Health conditions were coded as 'not covered-health

1  
2  
3 condition' (nc-hc). To summarize the identified health conditions, they were grouped based on  
4 the structure of the International Classification of Diseases(34). Concepts related to the  
5 "particular background of an individual's life and living" (e.g. life experiences) were linked to  
6 personal factors(10). As there are no codes for these concepts in the ICF they were coded as  
7 'personal factors' (pf).<sup>3</sup> When consensus between the two researchers was not reached, a third  
8 researcher was consulted. If an ICF category was assigned repeatedly in an assessment  
9 instrument, it was counted only once. However, when a publication reported on a study that  
10 used multiple instruments and a specific category was identified in more than one of these  
11 instruments, this particular category was counted according to the number of instruments to  
12 which it was linked. Therefore, the maximum count of one category can exceed the number of  
13 identified studies included in the review. We used descriptive statistics to report the most  
14 frequently identified ICF categories. Categories that were frequently identified are assumed to  
15 be particularly relevant from the researcher's perspective(11).

16  
17  
18  
19  
20  
21  
22  
23  
24  
25  
26  
27  
28  
29  
30 Only first-level and second-level ICF categories are reported in this paper.<sup>4</sup> If a concept was  
31 linked to a third- or fourth-level ICF category, the overarching second-level category was  
32 included for analysis. Due to the hierarchical nature of the ICF, a lower-level category shares  
33 the attributes of the higher-level category of which it is a member(10).

### 3.7 Patient and public involvement

34  
35  
36  
37  
38  
39  
40  
41 Patients and the public were not involved in this study.

## 4 Results

### 4.1 Study Selection

42  
43  
44  
45  
46  
47  
48  
49  
50 A total of 10,043 publications were identified. After removing duplicates, 5,060 potentially  
51 relevant publications were left. In the abstract screening 681 articles were identified for full-text  
52 screening. Of these, a random sample of 341 articles (50%) was drawn for the full text  
53 screening, from which 68 articles were subsequently included for data extraction (see figure  
54 1). The references of the included studies are available in Appendix B and the study  
55 characteristics are provided in Appendix C.

Please insert figure 1 here

## 4.2 Study characteristics

The 68 included studies were conducted in 16 different countries. Almost 20% of the studies were conducted in Finland (n = 13), 14.7% in the United States (n = 10) and 10.3% (n = 7) in Sweden and Italy respectively. The investigated study population consisted of 69,718 community-dwelling older adults, of whom 71.0% were female. One publication did not provide information about the gender of the participants. Most of the studies (72.3%) had an observational design (longitudinal or cross sectional), 14.7% were intervention studies, 5.9% analyzed secondary data, 5.6% were qualitative studies and one study (1.5%) used mixed methods.

## 4.3 Linking Results

From the 68 included publications 111 assessment instruments were identified. Out of these, 30 were identified in at least two of the publications and were included for data extraction (table 1).

Table 1

*Frequency of use and thematic focus of the included assessment instruments.*

| Assessment instrument<br>(study references: see App. B)                                                                                 | Nr. of studies | Cognition | Mobility | Functioning<br>status | Environmental<br>factors | Health conditions |
|-----------------------------------------------------------------------------------------------------------------------------------------|----------------|-----------|----------|-----------------------|--------------------------|-------------------|
| Mini Mental State Examination (MMSE)<br>(1, 3, 4, 7, 8, 10, 15, 17, 18, 23, 38, 39, 43, 44, 45, 47, 48, 49, 51, 54, 55, 56, 61, 62, 63) | 25             | x         |          |                       |                          |                   |
| Geriatric Depression Scale - 15 items<br>(1, 7, 8, 23, 35, 43, 49, 50, 55, 61, 62, 65, 66)                                              | 13             |           |          |                       |                          | x                 |
| Lawton Instrumental Activities of Daily Living Scale<br>(5, 7, 12, 17, 18, 32, 33, 34, 41, 43, 50, 58)                                  | 12             |           |          | x                     |                          |                   |
| Katz Index of Independence in Activities of Daily Living<br>(8, 10, 32, 33, 34, 40, 41, 58, 67)                                         | 9              |           |          | x                     |                          |                   |
| Timed up and go<br>(1, 5, 12, 14, 19, 28, 53)                                                                                           | 7              |           | x        |                       |                          |                   |
| Short Physical Performance Battery<br>(15, 23, 27, 30, 31, 36, 48)                                                                      | 7              |           | x        |                       |                          |                   |



|    |                                                      |   |  |  |  |   |   |   |
|----|------------------------------------------------------|---|--|--|--|---|---|---|
| 1  |                                                      |   |  |  |  |   |   |   |
| 2  |                                                      |   |  |  |  |   |   |   |
| 3  | Activities of Daily Living staircase                 | 6 |  |  |  |   |   |   |
| 4  | (20, 21, 22, 29, 35, 66)                             |   |  |  |  | x |   |   |
| 5  |                                                      |   |  |  |  |   |   |   |
| 6  | Short Form Health 36                                 | 5 |  |  |  |   |   |   |
| 7  | (9, 14, 16, 19, 26)                                  |   |  |  |  | x |   |   |
| 8  | Geriatric Depression Scale - 30 items                | 5 |  |  |  |   |   |   |
| 9  | (5, 23, 33, 34, 67)                                  |   |  |  |  |   |   | x |
| 10 |                                                      |   |  |  |  |   |   |   |
| 11 | Barthel Index of Activities of Daily Living          | 5 |  |  |  |   |   |   |
| 12 | (5, 12, 17, 18, 43)                                  |   |  |  |  | x |   |   |
| 13 |                                                      |   |  |  |  |   |   |   |
| 14 | Center for Epidemiologic Studies Depression Scale    | 5 |  |  |  |   |   |   |
| 15 | (15, 27, 37, 40, 60)                                 |   |  |  |  |   |   | x |
| 16 | The University of Alabama at Birmingham Study of     | 4 |  |  |  |   |   |   |
| 17 | Aging Life-Space Assessment                          |   |  |  |  |   |   | x |
| 18 | (8, 15, 44, 59)                                      |   |  |  |  |   |   |   |
| 19 | EuroQoL-5 dimension                                  | 4 |  |  |  |   |   |   |
| 20 | (25, 41, 62, 63)                                     |   |  |  |  | x |   |   |
| 21 |                                                      |   |  |  |  |   |   |   |
| 22 | Berg Balance Scale                                   | 3 |  |  |  |   |   |   |
| 23 | (1, 4, 21)                                           |   |  |  |  | x |   |   |
| 24 |                                                      |   |  |  |  |   |   |   |
| 25 | Groningen Activity Restrictions Scale                | 3 |  |  |  |   |   |   |
| 26 | (54, 61, 62)                                         |   |  |  |  |   |   | x |
| 27 |                                                      |   |  |  |  |   |   |   |
| 28 | Abbreviated Mental Test Score                        | 3 |  |  |  |   |   |   |
| 29 | (32, 33, 34)                                         |   |  |  |  | x |   |   |
| 30 |                                                      |   |  |  |  |   |   |   |
| 31 | Minimum Data Set - Home Care                         | 3 |  |  |  |   |   |   |
| 32 | (30, 31, 36)                                         |   |  |  |  | x | x | x |
| 33 |                                                      |   |  |  |  |   |   |   |
| 34 | Mobility-Tiredness-Scale                             | 3 |  |  |  |   |   |   |
| 35 | (384, 37, 63)                                        |   |  |  |  |   |   |   |
| 36 |                                                      |   |  |  |  |   |   |   |
| 37 | Usability in my Home Questionnaire                   | 3 |  |  |  |   |   |   |
| 38 | (29, 35, 66)                                         |   |  |  |  |   |   | x |
| 39 |                                                      |   |  |  |  |   |   |   |
| 40 | Perceived environmental barriers to outdoor mobility | 2 |  |  |  |   |   |   |
| 41 | (47, 48)                                             |   |  |  |  |   |   | x |
| 42 |                                                      |   |  |  |  |   |   |   |
| 43 | Cognitive Performance Scale                          | 2 |  |  |  |   |   |   |
| 44 | (30, 36)                                             |   |  |  |  | x |   |   |
| 45 |                                                      |   |  |  |  |   |   |   |
| 46 | Functional Independence Measure                      | 2 |  |  |  |   |   |   |
| 47 | (52, 53)                                             |   |  |  |  | x | x | x |
| 48 |                                                      |   |  |  |  |   |   |   |
| 49 | Gait Speed                                           | 2 |  |  |  |   |   |   |
| 50 | (2, 12)                                              |   |  |  |  | x |   |   |
| 51 |                                                      |   |  |  |  |   |   |   |
| 52 | Gijón Social Scale                                   | 2 |  |  |  |   |   |   |
| 53 | (12, 18)                                             |   |  |  |  |   |   | x |
| 54 |                                                      |   |  |  |  |   |   |   |
| 55 | Housing Enabler Screening Tool                       | 2 |  |  |  |   |   |   |
| 56 | (29, 35)                                             |   |  |  |  |   |   | x |
| 57 |                                                      |   |  |  |  |   |   |   |
| 58 | Housing Options for Older People                     | 2 |  |  |  |   |   |   |
| 59 | (35, 66)                                             |   |  |  |  |   |   | x |
| 60 |                                                      |   |  |  |  |   |   |   |
| 61 | Impact on Participation and Autonomy Questionnaire   | 2 |  |  |  |   |   |   |
| 62 | (39, 47)                                             |   |  |  |  | x | x | x |
| 63 |                                                      |   |  |  |  |   |   |   |
| 64 | Instrumental Activity Measure                        | 2 |  |  |  |   |   |   |
| 65 | (52, 53)                                             |   |  |  |  |   |   | x |
| 66 |                                                      |   |  |  |  |   |   |   |
| 67 | Mini Nutritional Assessment                          | 2 |  |  |  |   |   |   |
| 68 | (17, 18)                                             |   |  |  |  | x | x | x |
| 69 |                                                      |   |  |  |  |   |   |   |
| 70 | Neuropsychological Aging Inventory                   | 2 |  |  |  |   |   |   |
| 71 | (29, 57)                                             |   |  |  |  |   |   | x |
| 72 |                                                      |   |  |  |  |   |   |   |

Note. The numbers in brackets refer to the studies (see Appendix B), in which the instrument was used.

The most frequently used assessment instrument was the Mini Mental State Examination (MMSE), which was reported in 25 articles (36.8%). From the selected assessment instruments 1,182 concepts were extracted. Out of these, 24 concepts were linked to first-level ICF categories, 1,066 to second-level categories and 48 multidimensional concepts to two or more ICF categories. Forty-four concepts could not be assigned to a specific ICF category.

The 1,066 concepts were assigned to 87 different second-level ICF categories (see table 2). Of these, 41 (47.1%) are related to 'activities and participation', 24 (27.6%) categories refer to 'body functions', 20 (23.0%) to 'environmental factors' and two (2.3%) belong to 'body structures'. Mentioned 53 times, the category *memory functions (b144)* was the most frequently identified category. Within the 'activities and participation' component, the category *dressings (d540)* and within the 'environmental factors' component, *products or substances for personal consumption (e110)* were identified most often. The two extracted ICF categories for 'body structures' were *structure of upper extremity (s730)* and *structure of lower extremity (s750)*. All 87 ICF categories will serve as candidates for consideration for inclusion in the final ICF-CS during the consensus conference.

Table 2

*Frequency of second-level ICF categories linked to concepts identified in the assessment instruments.*

| ICF code                            | ICF category                                    | Count      |
|-------------------------------------|-------------------------------------------------|------------|
| <b>Activities and participation</b> |                                                 | <b>612</b> |
| d177                                | Making decisions                                | 9          |
| d166                                | Reading                                         | 2          |
| d170                                | Writing                                         | 2          |
| d210                                | Undertaking a single task                       | 28         |
| d230                                | Carrying out daily routine                      | 9          |
| d240                                | Handling stress and other psychological demands | 7          |
| d360                                | Using communication devices and techniques      | 17         |
| d410                                | Changing basic body position                    | 39         |
| d450                                | Walking                                         | 36         |
| d470                                | Using transportation                            | 25         |
| d455                                | Moving around                                   | 24         |

1  
2  
3  
4  
5  
6  
7  
8  
9  
10  
11  
12  
13  
14  
15  
16  
17  
18  
19  
20  
21  
22  
23  
24  
25  
26  
27  
28  
29  
30  
31  
32  
33  
34  
35  
36  
37  
38  
39  
40  
41  
42  
43  
44  
45  
46  
47  
48  
49  
50  
51  
52  
53  
54  
55  
56  
57  
58  
59  
60

|                       |                                      |            |
|-----------------------|--------------------------------------|------------|
| d460                  | Moving around in different locations | 21         |
| d475                  | Driving                              | 17         |
| d420                  | Transferring oneself                 | 15         |
| d430                  | Lifting and carrying objects         | 8          |
| d445                  | Hand and arm use                     | 5          |
| d415                  | Maintaining a body position          | 3          |
| d465                  | Moving around using equipment        | 2          |
| d540                  | Dressing                             | 41         |
| d510                  | Washing oneself                      | 39         |
| d550                  | Eating                               | 36         |
| d530                  | Toileting                            | 30         |
| d520                  | Caring for body parts                | 13         |
| d560                  | Drinking                             | 11         |
| d570                  | Looking after one's health           | 5          |
| d640                  | Doing housework                      | 37         |
| d630                  | Preparing meals                      | 28         |
| d620                  | Acquisition of goods and service     | 28         |
| d650                  | Caring for household objects         | 6          |
| d660                  | Assisting others                     | 2          |
| d750                  | Informal social relationships        | 4          |
| d710                  | Basic interpersonal interactions     | 2          |
| d720                  | Complex interpersonal interactions   | 2          |
| d760                  | Family relationships                 | 2          |
| d770                  | Intimate relationships               | 2          |
| d870                  | Economic self-sufficiency            | 17         |
| d850                  | Remunerative employment              | 7          |
| d860                  | Basic economic transactions          | 2          |
| d920                  | Recreation and leisure               | 19         |
| d910                  | Community life                       | 5          |
| d930                  | Religion and spirituality            | 5          |
| <b>Body functions</b> |                                      | <b>359</b> |
| b144                  | Memory functions                     | 53         |
| b114                  | Orientation functions                | 35         |
| b140                  | Attention functions                  | 35         |

|    |                              |                                                                                        |           |
|----|------------------------------|----------------------------------------------------------------------------------------|-----------|
| 1  |                              |                                                                                        |           |
| 2  |                              |                                                                                        |           |
| 3  | b152                         | Emotional functions                                                                    | 35        |
| 4  |                              |                                                                                        |           |
| 5  | b167                         | Mental functions of language                                                           | 30        |
| 6  |                              |                                                                                        |           |
| 7  | b130                         | Energy and drive functions                                                             | 28        |
| 8  |                              |                                                                                        |           |
| 9  | b126                         | Temperament and personality functions                                                  | 23        |
| 10 |                              |                                                                                        |           |
| 11 | b110                         | Consciousness functions                                                                | 5         |
| 12 |                              |                                                                                        |           |
| 13 | b134                         | Sleep functions                                                                        | 5         |
| 14 |                              |                                                                                        |           |
| 15 | b160                         | Thought functions                                                                      | 5         |
| 16 |                              |                                                                                        |           |
| 17 | b147                         | Psychomotor functions                                                                  | 3         |
| 18 |                              |                                                                                        |           |
| 19 | b172                         | Calculation functions                                                                  | 3         |
| 20 |                              |                                                                                        |           |
| 21 | b280                         | Sensation of pain                                                                      | 12        |
| 22 |                              |                                                                                        |           |
| 23 | b210                         | Seeing functions                                                                       | 3         |
| 24 |                              |                                                                                        |           |
| 25 | b230                         | Hearing functions                                                                      | 3         |
| 26 |                              |                                                                                        |           |
| 27 | b330                         | Fluency and rhythm of speech functions                                                 | 5         |
| 28 |                              |                                                                                        |           |
| 29 | b525                         | Defecation functions                                                                   | 19        |
| 30 |                              |                                                                                        |           |
| 31 | b510                         | Ingestion functions                                                                    | 3         |
| 32 |                              |                                                                                        |           |
| 33 | b530                         | Weight maintenance functions                                                           | 3         |
| 34 |                              |                                                                                        |           |
| 35 | b620                         | Urination functions                                                                    | 25        |
| 36 |                              |                                                                                        |           |
| 37 | b755                         | Involuntary movement reaction functions                                                | 13        |
| 38 |                              |                                                                                        |           |
| 39 | b730                         | Muscle power functions                                                                 | 7         |
| 40 |                              |                                                                                        |           |
| 41 | b810                         | Protective functions of the skin                                                       | 3         |
| 42 |                              |                                                                                        |           |
| 43 | b820                         | Repair functions of the skin                                                           | 3         |
| 44 |                              |                                                                                        |           |
| 45 | <b>Body structures</b>       |                                                                                        | <b>4</b>  |
| 46 | s750                         | Structure of lower extremity                                                           | 2         |
| 47 |                              |                                                                                        |           |
| 48 | s730                         | Structure of upper extremity                                                           | 2         |
| 49 |                              |                                                                                        |           |
| 50 | <b>Environmental factors</b> |                                                                                        | <b>91</b> |
| 51 | e110                         | Products or substances for personal consumption                                        | 17        |
| 52 |                              |                                                                                        |           |
| 53 | e155                         | Design, construction and building products and technology of buildings for private use | 12        |
| 54 |                              |                                                                                        |           |
| 55 | e115                         | Products and technology for personal use in daily living                               | 5         |
| 56 |                              |                                                                                        |           |
| 57 | e120                         | Products and technology for personal indoor and outdoor mobility and transportation    | 4         |
| 58 |                              |                                                                                        |           |
| 59 | e125                         | Products and technology for communication                                              | 2         |
| 60 |                              |                                                                                        |           |
|    | e160                         | Products and technology of land development                                            | 2         |
|    |                              |                                                                                        |           |
|    | e165                         | Assets                                                                                 | 2         |
|    |                              |                                                                                        |           |
|    | e210                         | Physical geography                                                                     | 2         |
|    |                              |                                                                                        |           |
|    | e225                         | Climate                                                                                | 2         |

|    |      |                                                                  |   |
|----|------|------------------------------------------------------------------|---|
| 1  |      |                                                                  |   |
| 2  |      |                                                                  |   |
| 3  | e240 | Light                                                            | 2 |
| 4  |      |                                                                  |   |
| 5  | e250 | Sound                                                            | 2 |
| 6  |      |                                                                  |   |
| 7  | e310 | Immediate family                                                 | 5 |
| 8  | e315 | Extended family                                                  | 5 |
| 9  |      |                                                                  |   |
| 10 | e320 | Friends                                                          | 5 |
| 11 |      |                                                                  |   |
| 12 | e325 | Acquaintances, peers colleagues, neighbors and community members | 5 |
| 13 |      |                                                                  |   |
| 14 | e355 | Health professionals                                             | 3 |
| 15 | e575 | General social support services, systems and policies            | 5 |
| 16 |      |                                                                  |   |
| 17 | e580 | Health services, systems and policies                            | 5 |
| 18 |      |                                                                  |   |
| 19 | e530 | Utilities services, systems and policies                         | 4 |
| 20 |      |                                                                  |   |
| 21 | e520 | Open space planning services, systems and policies               | 2 |
| 22 |      |                                                                  |   |
| 23 | e530 | Utilities services, systems and policies                         | 4 |
| 24 |      |                                                                  |   |
| 25 | e520 | Open space planning services, systems and policies               | 2 |

*Note.* d: activities and participation, b: body functions, s: body structures, e: environmental factors

The assigned first-level categories can be seen in table 3. Forty-eight extracted concepts were not linkable to only one ICF category. For these concepts, two or more categories were chosen for each concept (table 4).

Table 3

*Frequency of first-level ICF categories linked to concepts identified in the assessment instruments.*

| ICF Codes | ICF category                                 | Count |
|-----------|----------------------------------------------|-------|
| e3        | Support and relationships                    | 9     |
| d7        | Interpersonal interactions and relationships | 5     |
| d3        | Communication                                | 2     |
| d4        | Mobility                                     | 2     |
| d5        | Self-care                                    | 2     |
| d6        | Domestic life                                | 2     |
| d8        | Major life areas                             | 2     |

*Note.* e: environmental factors, d: activities & participation

Table 4

*Frequency of combinations of ICF categories linked to concepts identified in the assessment instruments.*

| ICF codes          | Description                                 | Count |
|--------------------|---------------------------------------------|-------|
| b152, b1266        | Feeling worthless                           | 18    |
| b130, b1264        | Openness for new experiences                | 18    |
| b1470, d720, b1521 | Changes in behavior symptoms                | 3     |
| b152, b130         | Indicators of depression, anxiety, sad mood | 3     |
| b1641, d230, d177  | Cognitive skills for daily decision-making  | 3     |
| b755, b2402, b152  | Fear of falling                             | 3     |

*Note.* b: body functions, d: activities & participation

Out of the 44 concepts, which could not be assigned to a specific ICF category, 30 (68.2%) were characterized as 'not definable' (nd), (33) nine (20.5%) referred to 'personal factors' (pf) and five (11.4%) were 'health conditions'. The 'nd' concepts included general health (n = 14), physical health (n = 5), physical activity (n = 3), activities of daily living (n = 3) and other (n = 5). Concepts linked to 'personal factors' included living arrangements, self-sufficiency and medication adherence. The commonly reported health conditions were diseases of the skin and subcutaneous tissue, psychiatric disorders, neurological diseases, infectious diseases, diseases of the digestive system, sensory disorders, diseases of the musculoskeletal system, and cancer.

## 5 Discussion

As part of the project to develop an ICF-CS for community-dwelling adults  $\geq 75$  years old for use in primary care, this scoping review was performed to identify concepts of functioning that are considered relevant in frequently used assessment instruments published in the scientific literature. From this research perspective, the component 'activities and participation' has shown to be the most relevant among all ICF components with regard to functioning of older patients. Almost half of all assigned categories are in this component. ICF categories that belong to the components 'body functions' and 'environmental factors', were less frequently assigned. From the content of the assessment instruments only four concepts were linked to two ICF categories of the component 'body structures'. Thus, this component was by far the least linked component. However, this might be due to the fact that studies which solely

1  
2  
3 focused on body structures without considering any other features of functioning were  
4 excluded. As mentioned before, such studies were excluded to help ensure that the resulting  
5 ICF-CS goes beyond the biological aspects of health provision and promotes those  
6 components of the ICF that might not yet receive enough attention in primary care. It is  
7 noteworthy that the ICF-CS for primary care and for the geriatric population developed by the  
8 research groups in the Netherlands also did not include body structures(13-15).

9  
10  
11  
12  
13  
14  
15  
16 The ICF chapters with the most frequently assigned categories were: b1 'mental functions', d4  
17 'mobility', d5 'self-care', and d6 'domestic life'. These areas are of special interest as they are  
18 prerequisites for being able to live independently at home. In a meta-analysis, indicators of  
19 functional and cognitive impairments were identified as the strongest predictors for  
20 necessitating admission to a nursing home(35). Cognitive impairment has also been identified  
21 as the strongest predictor for necessitating nursing home placement in a study investigating  
22 caregivers reasons for nursing home placement(36). Frequently identified categories referring  
23 to d5 'self-care' were *dressing (d540)*, *washing oneself (d510)*, *eating (d550)*, and *toileting*  
24 *(d530)*. These are all activities of daily living. Literature indicates, that older adults with  
25 problems in three or more activities of daily living had a higher risk of being admitted to a  
26 nursing home than adults without problems(35). Household activities, like *doing housework*  
27 *(d640)* or *preparing meals (d630)*, have frequently been identified in this review, but have not  
28 been found to be a major predictor for nursing home placement(35). This might be due to the  
29 fact that impairments in these areas can easily be compensated e.g. with household aids or  
30 assistance from family members.

31  
32  
33  
34  
35  
36  
37  
38  
39  
40  
41  
42  
43  
44  
45  
46  
47  
48  
49  
50  
51  
52  
53  
54  
55  
56  
57  
58  
59  
60  
No concepts were identified referring to the chapter b4 'functions of the cardiovascular,  
hematological, immunological and respiratory systems'. This might be due to the fact, that  
health conditions are coded with 'nc-hc' and not with the ICF category representing the  
underlying functions affected by a certain disease. Another explanation might be that, although  
the prevalence of diseases in these systems, especially of cardiovascular diseases, has  
increased since the 1980s, inability to perform activities of daily living as well as mortality  
induced by these diseases has decreased in the same period(2). This might be an explanation

1  
2  
3 why recent research that focuses on functioning of older adults, as reflected by the publications  
4 from 2007-2017, is less concerned with functions of the cardiovascular, hematological,  
5 immunological and respiratory systems. Moreover, no concepts were identified in the chapter  
6 e4 'attitudes'. Attitudes may be more in the focus of qualitative research, which, due to the  
7 focus of this review on assessment instruments, did barely show up. However, as several  
8 studies and systematic reviews suggest that negative attitudes towards old age negatively  
9 affect the health of the older persons, attitudes might be a relevant aspect to also include in  
10 instruments used for assessing functioning(37-39).

11  
12 Concepts referring to environmental factors with an impact on an individual's life were  
13 minimally addressed in the assessment instruments reported in the included articles. The most  
14 frequently identified category in this section was *products or substances for personal*  
15 *consumption (e110)*, mainly assigned for the concept of medication. However, environmental  
16 factors like housing design (e.g. lighting conditions, uneven surfaces), neighborhood planning  
17 (e.g. public transportation, walkable community services), and social support (e.g. family,  
18 friends, or health professionals) play a crucial role in old age. Considering these environmental  
19 factors can contribute to the prevention of falls, nursing home placement as well as to the  
20 compensation of other negative effects of age-related declines(35, 40-42). Thus, developing  
21 instruments that addresses these essential environmental factors or revising current  
22 assessment instruments to include more environmental factors items may be warranted.

### 23 24 25 26 27 28 29 30 31 32 33 34 35 36 37 38 39 40 41 42 43 **5.1 Strengths and limitations**

44  
45 There are several strengths and limitations of this scoping review. A broad literature review  
46 was performed using a systematic search strategy in five key medical and social databases.  
47 This review encompassed a broad spectrum of studies, including cross-sectional and  
48 longitudinal studies as well as randomized controlled trials. However, due to the focus on  
49 assessment instruments, qualitative studies, which have the potential to analyze participants'  
50 feelings, opinions, and experiences in-depth, are underrepresented in this study.

51  
52 Another limitation of this literature review is the restriction to articles published in English or.  
53 Thus, relevant studies conducted in the selected countries, but published in the authors' native  
54  
55  
56  
57  
58  
59  
60



1  
2  
3 language were possibly missed. Also drawing a random sample for full text screening carries  
4 the risk of losing potentially relevant publications. Finally, excluding studies that focus solely  
5 on body structures may have introduced some bias in the results. The reason for excluding  
6 these studies was mentioned above.  
7  
8  
9

10  
11 Some potentially relevant information may have been lost in the linking process, as single ICF  
12 categories are often not precise enough to represent some relevant concepts for older adults.  
13 For example, fatigue, falls or fear of falling could not easily be linked to one specific ICF  
14 category. Sometimes more than one category was necessary and still the concept might not  
15 be adequately described; e.g. fear of falling was linked using *involuntary movement reaction*  
16 *functions (b755)*, *sensation of falling (b2402)*, and *emotional functions (b152)*. Other concepts  
17 could only be linked to the very general first-level ICF categories, not allowing a detailed  
18 representation of the concept; e.g. isolation was linked to *support and relationships (e3)*.  
19 Sometimes, the same concept could be linked to different categories. This was especially the  
20 case for concepts regarding the change of body positions. For example, the concept “get into  
21 bed” can be linked to:  
22  
23  
24  
25  
26  
27  
28  
29  
30  
31  
32  
33

- 34 - *lying down (d4100)*; defined as “Getting into and out of a lying down position or  
35 *changing body position from horizontal to any other position, such as standing up or*  
36 *sitting down”(10) or to*  
37  
38
- 39 - *standing (d4104)*; defined as “Getting into and out of a standing position or changing  
40 *body position from standing to any other position, such as lying down or sitting*  
41 *down”(10).*  
42  
43  
44  
45  
46

47 This was one reason why we decided to link all concepts to second-level categories only. Being  
48 aware of these issues, WHO created a mechanism of updating ICF categories to further  
49 enhance the use of this classification(43). We will report the linking problems we faced to WHO  
50 after publication of this study.  
51  
52  
53  
54

## 55 **5.2 Implications for practice**

56  
57  
58  
59  
60

1  
2  
3 Within a consensus conference a comprehensive ICF-CS based on the results of this scoping  
4 review and the three other preparatory studies, and also considering the already existing ICF-  
5 CS for this target group mentioned in the introduction, will be developed.  
6  
7  
8  
9

10 As discussed, several aspects of functioning that were identified in this review are closely  
11 linked to independent living. There is some evidence that older patients tend to consider  
12 problems in functioning that threaten their independent living as most important, whereas their  
13 physicians focus more on somatic problems and risk factors(44). Thus, in order to better  
14 balance medical interventions according to the older patients' needs, it might be warranted to  
15 include more psychosocial and environmental information in the consultation process(45).  
16 Defining those aspects of functioning that are relevant from the research perspective seems  
17 important to us, because assessment instruments that are frequently used influence whether  
18 an intervention is seen to be effective or not. The concepts found therefore will have a strong  
19 influence on the final ICF-CS to be developed.  
20  
21  
22  
23  
24  
25  
26  
27  
28  
29  
30

## 31 **6 Conclusions**

32 In conclusion, this scoping review demonstrates that frequently used instruments for assessing  
33 functioning in older adults focus mainly on activities of daily living and mental functions,  
34 whereas environmental factors are only minimally addressed. Despite some limitations  
35 experienced in the linking process, the ICF provides a useful reference to identify and cluster  
36 the concepts used in assessment instruments focusing on functioning in community-dwelling  
37 older adults.  
38  
39  
40  
41  
42  
43  
44  
45  
46  
47

## 48 **7 Acknowledgements**

49 We would like to thank Volker Müller from the university library of the Friedrich-Alexander-  
50 Universität Erlangen Nürnberg for his support and advice in the development of the electronic  
51 search strategy.  
52  
53  
54  
55  
56  
57

58 The present work was performed in partial fulfilment of the requirements for obtaining the  
59 degree 'Dr. rer. biol. hum.' for Johanna Tomandl.  
60

## 8 Footnotes

### 8.1 Contributors

JT was involved in the development of the search strategy; performed the literature search; took part in the screening of the papers, the data extraction and the linking process; performed the data analysis; was involved in the interpretation of the data; drafted parts of the manuscript and collated all sections from the co-authors. SHe was involved in the development of the search strategy, the screening of the papers, the data extraction, the linking process and the interpretation of the data. MS advised the research team on the ICF Core Set methodology and revised the draft. EF was involved in the conception of the study, the development of the search strategy and the abstract screening; provided supervision and revised the draft. EG/TK/SHu were involved in the conception of the study and in the development of the search strategy; provided supervision and revised the draft. SB/SG were involved in the development of the search strategy, the screening of the papers, the data extraction, the linking process and the interpretation of the data; drafted parts of the manuscript. All authors read and approved the final version of the manuscript. SB and SG contributed equally to this work.

### 8.2 Funding

This work was supported by the German Federal Ministry of Education and Research grant number 01GY1605.

### 8.3 Disclaimer

The funders had no role in the study design, data collection and analysis, decision to publish, or preparation of the manuscript.

### 8.4 Competing interests

None declared.

### 8.5 Patient consent for publication

Not required.

### 8.6 Ethics approval

1  
2  
3 Not required.  
4  
5

## 6 **8.7 Data availability statement**

7  
8 The datasets used and analyzed during the current study are available from the corresponding  
9 author upon reasonable request.  
10  
11

## 12 **8.8 Notes**

13  
14  
15 <sup>1</sup> A list of accredited ICF-CS can be found here: <https://www.icf-core-sets.org/en/page1.php>.<sup>2</sup>

16  
17 The ICF Research Branch is a cooperation partner within the WHO collaborating center for  
18 the Family of International Classifications (WHO-FIC) in Germany, which aims to promote  
19 health by implementing ICF based tools and models.<sup>3</sup> In the International Classification of  
20 Functioning, Disability and Health personal factors are defined as factors related to the  
21 individual (e.g. age, gender, life experiences) whereas environmental factors cover all  
22 aspects of the external world that have an impact on functioning (e.g. social systems or  
23 laws).<sup>4</sup> The categories of the ICF are divided into different levels. First-level categories are  
24 coded using the component letter (b, s, d, or e) followed by the chapter number (one digit).  
25 Second-level categories are coded using the letter and three digits; the third- and fourth-level  
26 categories using the letter and four or five digits.  
27  
28  
29  
30  
31  
32  
33  
34  
35  
36  
37  
38

## 39 **9 References**

- 40  
41  
42  
43 1. Christensen K, Doblhammer G, Rau R, et al. Ageing populations: the challenges  
44 ahead. *Lancet*. 2009;374(9696):1196-208.10.1016/S0140-6736(09)61460-4.  
45 2. Crimmins EM. Trends in the health of the elderly. *Annu Rev Public Health*.  
46 2004;25:79-98.  
47 3. Klawiter M. Risk, prevention and the breast cancer continuum: the NCI, the FDA,  
48 health activism and the pharmaceutical industry. *History and Technology*. 2002;18(4):309-53.  
49 4. Aronowitz RA. The converged experience of risk and disease. *The Milbank Quarterly*.  
50 2009;87(2):417-42.  
51 5. Kostev K, Jacob L. Multimorbidity and polypharmacy among elderly people followed  
52 in general practices in Germany. *European journal of internal medicine*. 2018;55:66-  
53 8.10.1016/j.ejim.2018.07.014.  
54 6. Frazier SC. Health outcomes and polypharmacy in elderly individuals. *J Gerontol*  
55 *Nurs*. 2005;31(9):4-9.  
56 7. Calderón-Larrañaga A, Poblador-Plou B, González-Rubio F, et al. Multimorbidity,  
57 polypharmacy, referrals, and adverse drug events: are we doing things well? *Br J Gen Pract*.  
58 2012;62(605):e821-e6.10.3399/bjgp12X659295.  
59 8. Chatterji S, Byles J, Cutler D, et al. Health, functioning, and disability in older adults -  
60 present status and future implications. *Lancet*. 2015;385(9967):563-75.

- 1
  - 2
  - 3
  - 4
  - 5
  - 6
  - 7
  - 8
  - 9
  - 10
  - 11
  - 12
  - 13
  - 14
  - 15
  - 16
  - 17
  - 18
  - 19
  - 20
  - 21
  - 22
  - 23
  - 24
  - 25
  - 26
  - 27
  - 28
  - 29
  - 30
  - 31
  - 32
  - 33
  - 34
  - 35
  - 36
  - 37
  - 38
  - 39
  - 40
  - 41
  - 42
  - 43
  - 44
  - 45
  - 46
  - 47
  - 48
  - 49
  - 50
  - 51
  - 52
  - 53
  - 54
  - 55
  - 56
  - 57
  - 58
  - 59
  - 60
9. Lee SJ, Go AS, Lindquist K, et al. Chronic conditions and mortality among the oldest old. *Am J Public Health*. 2008;98(7):1209-14.10.2105/Ajph.2007.130955.
10. World Health Organization. International Classification of Functioning, Disability and Health: ICF: World Health Organization 2001.
11. Selb M, Escorpizo R, Kostanjsek N, et al. A guide on how to develop an International Classification of Functioning, Disability and Health Core Set. *European Journal of Physical and Rehabilitation Medicine*. 2015;51(1):105-17.
12. Grill E, Hermes R, Swoboda W, et al. ICF Core Set for geriatric patients in early post-acute rehabilitation facilities. *Disabil Rehabil*. 2005;27(7-8):411-7.10.1080/09638280400013966.
13. Emmen B, van Boven K, ten Napel H. Exploration of the desired content of an 'International Classification of Functioning' (ICF) item set for multimorbid patients in general practice. *Newsletter WHO-FIC Annual Network Meeting*. 2014;12(1):9-11.
14. Postma S, van Boven K, Ten Napel H, et al. The development of an ICF-based questionnaire for patients with chronic conditions in primary care. *J Clin Epidemiol*. 2018;103:92-100.
15. Spoorenberg SLW, Reijneveld SA, Middel B, et al. The Geriatric ICF Core Set reflecting health-related problems in community-living older adults aged 75 years and older without dementia: development and validation. *Disabil Rehabil*. 2015;37(25):2337-43.10.3109/09638288.2015.1024337.
16. Tomandl J, Book S, Hoefle A, et al. Laying the foundation for an ICF core set for community-dwelling elderly adults in primary care: the patient-perspective identified in a qualitative study. 2020.
17. Book S, Ulbrecht G, Tomandl J, et al. Laying the foundation for an ICF Core Set for community-dwelling elderly adults in primary care: The clinical perspective identified in a cross-sectional study 2020.
18. Tomandl J, Book S, Gotthardt S, et al. Laying the foundation for a core set of the International Classification of Functioning, Disability and Health for community-dwelling adults aged 75 years and above in general practice: a study protocol. *BMJ Open*. 2018;8(8):e024274.10.1136/bmjopen-2018-024274.
19. Tricco AC, Lillie E, Zarin W, et al. PRISMA extension for scoping reviews (PRISMA-ScR): checklist and explanation. *Ann Intern Med*. 2018;169(7):467-73.
20. Tacconelli E. Systematic reviews: CRD's guidance for undertaking reviews in health care. *The Lancet Infectious Diseases*. 2010;10(4):226.
21. Geyh S, Cieza A, Schouten J, et al. ICF Core Sets for stroke. *J Rehabil Med*. 2004;36(0):135-41.
22. de Schipper E, Lundquist A, Coghill D, et al. Ability and disability in autism spectrum disorder: A systematic literature review employing the international classification of functioning, disability and health-children and youth version. *Autism Res*. 2015;8(6):782-94.
23. Granberg S, Dahlström J, Möller C, et al. The ICF core sets for hearing loss—researcher perspective. Part I: Systematic review of outcome measures identified in audiological research. *Int J Audio*. 2014;53(2):65-76.
24. Gorostiaga A, Balluerka N, Guilera G, et al. Functioning in patients with schizophrenia: a systematic review of the literature using the International Classification of Functioning, Disability and Health (ICF) as a reference. *Qual Life Res*. 2017;26(3):531-43.
25. Random Integer Set Generator 2018. Available from: <https://www.random.org/integer-sets/>. (Accessed 20 Dec 2018).
26. Wolff B, Cieza A, Parentin A, et al. Identifying the concepts contained in outcome measures of clinical trials on four internal disorders using the International Classification of Functioning, Disability and Health as a reference. *J Rehabil Med*. 2004(44 Suppl):37-42.10.1080/16501960410015407.
27. Wasiak J, McMahan M, Danilla S, et al. Measuring common outcome measures and their concepts using the International Classification of Functioning, Disability and Health (ICF) in adults with burn injury: a systematic review. *Burns*. 2011;37(6):913-24.

- 1  
2  
3 28. Brockow T, Cieza A, Kuhlow H, et al. Identifying the concepts contained in outcome  
4 measures of clinical trials on musculoskeletal disorders and chronic widespread pain using  
5 the International Classification of Functioning, Disability and Health as a reference. *J Rehabil*  
6 *Med.* 2004;36(0):30-6.
- 7 29. Geyh S, Kurt T, Brockow T, et al. Identifying the concepts contained in outcome  
8 measures of clinical trials on stroke using the International Classification of Functioning,  
9 Disability and Health as a reference. *J Rehabil Med.* 2004;36(0):56-62.
- 10 30. Offenbächer M, Cieza A, Brockow T, et al. Are the contents of treatment outcomes in  
11 fibromyalgia trials represented in the international classification of functioning, disability, and  
12 health? *Clin J Pain.* 2007;23(8):691-701.
- 13 31. Scheuringer M, Grill E, Boldt C, et al. Systematic review of measures and their  
14 concepts used in published studies focusing on rehabilitation in the acute hospital and in  
15 early post-acute rehabilitation facilities. *Disabil Rehabil.* 2005;27(7-8):419-29.
- 16 32. Bartoszek G, Fischer U, Müller M, et al. Outcome measures in older persons with  
17 acquired joint contractures: a systematic review and content analysis using the ICF  
18 (International Classification of Functioning, Disability and Health) as a reference. *BMC*  
19 *Geriatr.* 2016;16(1):40.
- 20 33. Cieza A, Fayed N, Bickenbach J, et al. Refinements of the ICF Linking Rules to  
21 strengthen their potential for establishing comparability of health information. *Disabil Rehabil.*  
22 2016;41(5):574-83. 10.3109/09638288.2016.1145258.
- 23 34. World Health O. ICD-10 : international statistical classification of diseases and related  
24 health problems : tenth revision. 2nd ed ed. Geneva: World Health Organization; 2004.
- 25 35. Gaugler JE, Duval S, Anderson KA, et al. Predicting nursing home admission in the  
26 US: a meta-analysis. *BMC Geriatr.* 2007;7(1):13. 10.1186/1471-2318-7-13.
- 27 36. Buhr GT, Kuchibhatla M, Clipp EC. Caregivers' reasons for nursing home placement:  
28 clues for improving discussions with families prior to the transition. *Gerontologist.*  
29 2006;46(1):52-61.
- 30 37. Horton S, Baker J, Pearce G, et al. On the malleability of performance: Implications  
31 for seniors. *J Appl Gerontol.* 2008;27(4):446-65.
- 32 38. Meisner BA. A meta-analysis of positive and negative age stereotype priming effects  
33 on behavior among older adults. *Journals of Gerontology Series B: Psychological Sciences*  
34 *and Social Sciences.* 2011;67(1):13-7.
- 35 39. Levy BR, Slade MD, Chang ES, et al. Ageism Amplifies Cost and Prevalence of  
36 Health Conditions. *Gerontologist.* 2018:gny131-gny. 10.1093/geront/gny131.
- 37 40. Lawton MP. Residential environment and self-directedness among older people. *Am*  
38 *Psychol.* 1990;45(5):638.
- 39 41. Lien WC, Chang JH, Guo NW, et al. Determinants of perceived physical environment  
40 barriers among community-dwelling elderly in Taiwan. *J Nutr Health Aging.* 2015;19(5):575-  
41 82. 10.1007/s12603-015-0473-4.
- 42 42. Wahl H-W, Iwarsson S, Oswald F. Aging well and the environment: Toward an  
43 integrative model and research agenda for the future. *Gerontologist.* 2012;52(3):306-16.
- 44 43. WHO-FIC Update and Revision Committee. ICF Update Platform. User Guide. 2013.
- 45 44. Theile G, Mueller C. [Multimorbid General Practice Patients - What's really  
46 important?]. *Praxis.* 2012;101:1621-6. 10.1024/1661-8157/a001145.
- 47 45. Nationale Akademie der Wissenschaften Leopoldina aDAdT, Union der deutschen  
48 Akademien der Wissenschaften. Medizinische Versorgung im Alter – Welche Evidenz  
49 brauchen wir? 2015.

## 10 List of abbreviations

ICF: International Classification of Functioning, Disability and Health

ICF-CS: International Classification of Functioning, Disability and Health Core Set

1  
2  
3 PRISMA-Sc: Preferred Reporting Items for Systematic Reviews and Meta-Analyses extension  
4  
5 for scoping reviews  
6

7 PICOS: Patients, Intervention, Comparison, Outcomes, Study design  
8  
9

## 10 **11 List of figures**

11  
12

13 *Figure 1.* Preferred Reporting Items for Systematic Reviews and Meta-Analyses (PRISMA)  
14  
15 flow chart.  
16  
17

18  
19  
20  
21  
22  
23  
24  
25  
26  
27  
28  
29  
30  
31  
32  
33  
34  
35  
36  
37  
38  
39  
40  
41  
42  
43  
44  
45  
46  
47  
48  
49  
50  
51  
52  
53  
54  
55  
56  
57  
58  
59  
60

For peer review only

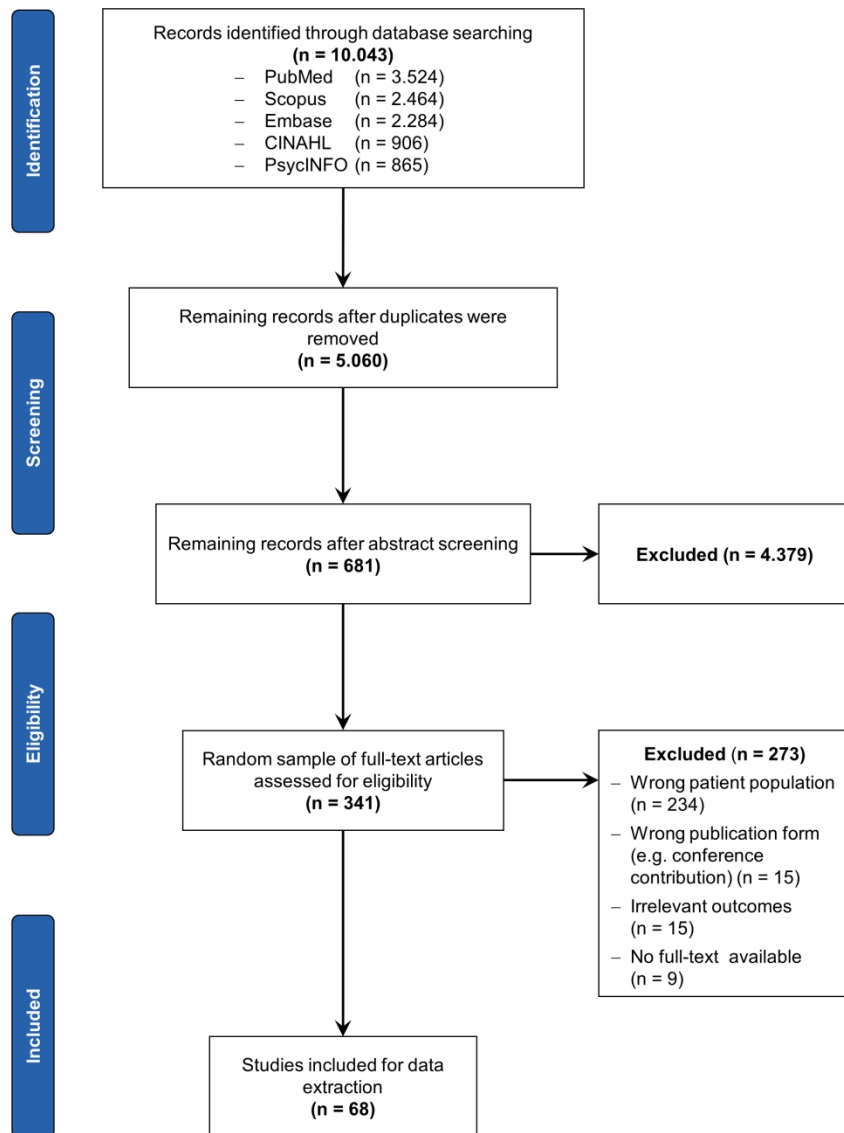

Figure 1. Preferred Reporting Items for Systematic Reviews and Meta-Analyses (PRISMA) flow chart.

190x254mm (300 x 300 DPI)



## Appendix A

### Search strategy Embase

1. aged/
2. very elderly/
3. aging/
4. "elder\*".ab,ti.
5. "senior\*".ab,ti.
6. "geriatric\*".ab,ti.
7. aging.ab,ti.
8. ageing.ab,ti.
9. "geriatric assessment"/
10. "limited mobility"/
11. "Sickness Impact Profile"/
12. "risk factor"/
13. "independent living"/
14. health/
15. "mental health"/
16. "quality of life"/
17. "women's health"/
18. "men's health"/
19. "health status"/
20. "International Classification of Functioning, Disability and Health"/
21. "community living"/
22. "coping behavior"/
23. disability/
24. "environmental factor"/
25. performance/
26. "physical disability"/
27. "ADL disability"/

- 1
- 2
- 3 28. "psychologic assessment"/
- 4
- 5 29. "self care"/
- 6
- 7 30. "social environment"/
- 8
- 9 31. "social interaction"/
- 10
- 11 32. "social life"/
- 12
- 13 33. "social problem"/
- 14
- 15 34. "wellbeing"/
- 16
- 17 35. "abilit\*" .ab,ti.
- 18
- 19 36. mobility.ab,ti.
- 20
- 21 37. "daily routine" .ab,ti.
- 22
- 23 38. "social life" .ab,ti.
- 24
- 25 39. performance.ab,ti.
- 26
- 27 40. self-care.ab,ti.
- 28
- 29 41. selfcare.ab,ti.
- 30
- 31 42. "social interaction" .ab,ti.
- 32
- 33 43. "interpersonal interaction" .ab,ti.
- 34
- 35 44. "coping strategy" .ab,ti.
- 36
- 37 45. "coping strategies" .ab,ti.
- 38
- 39 46. communitydwelling.ab,ti.
- 40
- 41 47. "community dwelling" .ab,ti.
- 42
- 43 48. "independent living" .ab,ti.
- 44
- 45 49. "independently living" .ab,ti.
- 46
- 47 50. "contextual factor\*" .ab,ti.
- 48
- 49 51. "protective factor\*" .ab,ti.
- 50
- 51 52. "risk factor\*" .ab,ti.
- 52
- 53 53. "personal factor\*" .ab,ti.
- 54
- 55 54. "environmental factor\*" .ab,ti.
- 56
- 57 55. "living alone" .ab,ti.
- 58
- 59 56. "sociocultural factor\*" .ab,ti.
- 60

- 1
- 2
- 3 57. "psychosocial factor\*".ab,ti.
- 4
- 5 58. "social environment".ab,ti.
- 6
- 7 59. "quality of life".ab,ti.
- 8
- 9 60. well-being.ab,ti.
- 10
- 11 61. wellbeing.ab,ti.
- 12
- 13 62. wellness.ab,ti.
- 14
- 15 63. ICF.ab,ti.
- 16
- 17 64. "International Classification of Functioning".ab,ti.
- 18
- 19 65. health.ab,ti.
- 20
- 21 66. "medical problem\*".ab,ti.
- 22
- 23 67. "psychological problem\*".ab,ti.
- 24
- 25 68. "social problem\*".ab,ti.
- 26
- 27 69. "physical change\*".ab,ti.
- 28
- 29 70. "physical illness".ab,ti.
- 30
- 31 71. "psychological change\*".ab,ti.
- 32
- 33 72. impairment.ab,ti.
- 34
- 35 73. "mental change\*".ab,ti.
- 36
- 37 74. "psychological assessment".ab,ti.
- 38
- 39 75. "cognitive assessment".ab,ti.
- 40
- 41 76. "needs assessment".ab,ti.
- 42
- 43 77. "neuropsychological assessment".ab,ti.
- 44
- 45 78. "behavioural assessment".ab,ti.
- 46
- 47 79. "behavioral assessment".ab,ti.
- 48
- 49 80. "social participation".ab,ti.
- 50
- 51 81. "activities of daily living".ab,ti.
- 52
- 53 82. "daily living activities".ab,ti.
- 54
- 55 83. "body function".ab,ti.
- 56
- 57 84. "body functions".ab,ti.
- 58
- 59 85. "body structures".ab,ti.
- 60

- 1  
2  
3 86. "body structure".ab,ti.  
4  
5 87. "social participation"/  
6  
7 88. "daily life activity"/  
8  
9 89. 80 or 81 or 82 or 83 or 84 or 85 or 86 or 87 or 88  
10  
11 90. (English or German).lg.  
12  
13 91. article.pt.  
14  
15 92. ("2007" or "2008" or "2009" or "2010" or "2011" or "2012" or "2013" or "2014" or "2015" or  
16 "2016" or "2017").yr.  
17  
18 93. "home environment".ab,ti.  
19  
20 94. "urban environment".ab,ti.  
21  
22 95. disability.ab,ti.  
23  
24 96. disabilities.ab,ti.  
25  
26 97. disable.ab,ti.  
27  
28 98. disabled.ab,ti.  
29  
30 99. disablement.ab,ti.  
31  
32 100. function.ab,ti.  
33  
34 101. functions.ab,ti.  
35  
36 102. functioning.ab,ti.  
37  
38 103. functional.ab,ti.  
39  
40 104. 1 or 2 or 3 or 4 or 5 or 6 or 7 or 8  
41  
42 105. 13 or 46 or 47 or 48 or 49 or 93 or 94  
43  
44 106. 9 or 10 or 11 or 12 or 14 or 15 or 16 or 17 or 18 or 19 or 20 or 21 or 22 or 23 or 24 or 25  
45 or 26 or 27 or 28 or 29 or 30 or 31 or 32 or 33 or 34 or 35 or 36 or 37 or 38 or 39 or 40 or 41  
46 or 42 or 43 or 44 or 45 or 50 or 51 or 52 or 53 or 54 or 55 or 56 or 57 or 58 or 59 or 60 or 61  
47 or 62 or 63 or 64 or 65 or 66 or 67 or 68 or 69 or 70 or 71 or 72 or 73 or 74 or 75 or 76 or 77  
48 or 78 or 79 or 95 or 96 or 97 or 98 or 99 or 100 or 101 or 102 or 103  
49  
50 107. 89 and 104 and 105 and 106  
51  
52 108. 90 and 92 and 107  
53  
54  
55  
56  
57  
58  
59  
60

## Appendix B

### References for included articles

1. Aartolahti E, Hakkinen A, Lonroos E, et al. Relationship between functional vision and balance and mobility performance in community-dwelling older adults. *Aging Clin Exp Res*. 2013;25(5):545-52.10.1007/s40520-013-0120-z.
2. Abellan van Kan G, Cesari M, Gillette-Guyonnet S, et al. Sarcopenia and cognitive impairment in elderly women: results from the EPIDOS cohort. *Age Ageing*. 2013;42(2):196-202.10.1093/ageing/afs173.
3. Ahluwalia SC, Gill TM, Baker DI, et al. Perspectives of older persons on bathing and bathing disability: A qualitative study. *J Am Geriatr Soc*. 2010;58(3):450-6.
4. Behm L, Eklund K, Wilhelmson K, et al. Health Promotion Can Postpone Frailty: Results from the RCT Elderly Persons in the Risk Zone. *Public Health Nurs*. 2016;33(4):303-15.10.1111/phn.12240.
5. Berkemeyer S, Schumacher J, Thiem U, et al. Bone T-scores and functional status: A cross-sectional study on german elderly. *PLoS ONE*. 2009;4(12).10.1371/journal.pone.0008216.
6. Blain H, Carriere I, Sourial N, et al. Balance and walking speed predict subsequent 8-year mortality independently of current and intermediate events in well-functioning women aged 75 years and older. *J Nutr Health Aging*. 2010;14(7):595-600.10.1007/s12603-010-0111-0.
7. Bollwein J, Diekmann R, Kaiser MJ, et al. Dietary quality is related to frailty in community-dwelling older adults. *J Gerontol A Biol Sci Med Sci*. 2013;68(4):483-9.10.1093/gerona/gls204.
8. Brown CJ, Kennedy RE, Lo AX, et al. Impact of Emergency Department Visits and Hospitalization on Mobility Among Community-Dwelling Older Adults. *Am J Med*. 2016;129(10):1124.e9-.e15.10.1016/j.amjmed.2016.05.016.
9. Byles JE, Leigh L, Vo K, et al. Life space and mental health: a study of older community-dwelling persons in Australia. *Aging & Mental Health*. 2015;19(2):98-106.10.1080/13607863.2014.917607.
10. Calvert JF, Kaye J, Leahy M, et al. Technology use by rural and urban oldest old. *Technol Health Care*. 2009;17(1):1-11.10.3233/THC-2009-0527.
11. Chipperfield JG, Newall NE, Chuchmach LP, et al. Differential determinants of men's and women's everyday physical activity in later life. *Journals of Gerontology - Series B Psychological Sciences and Social Sciences*. 2008;63(4):S211-S8.
12. Diez-Ruiz A, Bueno-Errandonea A, Nunez-Barrio J, et al. Factors associated with frailty in primary care: a prospective cohort study. *BMC Geriatr*. 2016;16:91.10.1186/s12877-016-0263-9.
13. Eckerblad J, Theander K, Ekdahl A, et al. To adjust and endure: a qualitative study of symptom burden in older people with multimorbidity. *Appl Nurs Res*. 2015;28(4):322-7.10.1016/j.apnr.2015.03.008.
14. El-Khoury F, Cassou B, Latouche A, et al. Effectiveness of two year balance training programme on prevention of fall induced injuries in at risk women aged 75-85 living in community: Ossébo randomised controlled trial. *BMJ (Online)*. 2015;351.10.1136/bmj.h3830.
15. Eronen J, von Bonsdorff M, Rantakokko M, et al. Socioeconomic Status and Life-Space Mobility in Old Age. *Journal of aging and physical activity*. 2016;24(4):617-23.10.1123/japa.2015-0196.
16. Fabre JM, Wood RH, Cherry KE, et al. Age-related deterioration in flexibility is associated with health-related quality of life in nonagenarians. *J Geriatr Phys Ther*. 2007;30(1):16-22.

17. Formiga F, Ferrer A, Padrós G, et al. Diabetes Mellitus as a Risk Factor for Functional and Cognitive Decline in Very Old People: The Octabaix Study. *Journal of the American Medical Directors Association*. 2014;15(12):924-8.10.1016/j.jamda.2014.07.019.
18. Formiga F, Ferrer A, Padros G, et al. Evidence of functional declining and global comorbidity measured at baseline proved to be the strongest predictors for long-term death in elderly community residents aged 85 years: A 5-year follow-up evaluation, the OCTABAIX study. *Clin Interv Aging*. 2016;11:437-44.10.2147/CIA.S101447.
19. Fritel X, Lachal L, Cassou B, et al. Mobility impairment is associated with urge but not stress urinary incontinence in community-dwelling older women: results from the Ossebo study. *BJOG*. 2013;120(12):1566-72.10.1111/1471-0528.12316.
20. Gustafsson S, Eklund K, Wilhelmson K, et al. Long-term outcome for ADL following the health-promoting RCT - elderly persons in the risk zone. *Gerontologist*. 2013;53(4):654-63.10.1093/geront/gns121.
21. Gustafsson S, Wilhelmson K, Eklund K, et al. Health-promoting interventions for persons aged 80 and older are successful in the short term - results from the randomized and three-armed Elderly Persons in the Risk Zone study. *J Am Geriatr Soc*. 2012;60(3):447-54.10.1111/j.1532-5415.2011.03861.x.
22. Hammar IO, Dahlin-Ivanoff S, Wilhelmson K, et al. Shifting between self-governing and being governed: A qualitative study of older persons' self-determination. *BMC Geriatr*. 2014;14(1).10.1186/1471-2318-14-126.
23. Hegendörfer E, Vaes B, Andreeva E, et al. Predictive Value of Different Expressions of Forced Expiratory Volume in 1 Second (FEV1) for Adverse Outcomes in a Cohort of Adults Aged 80 and Older. *Journal of the American Medical Directors Association*. 2017;18(2):123-30.10.1016/j.jamda.2016.08.012.
24. Heyl V, Wahl H. Cognitive ability as a resource for everyday functioning among older adults who are visually impaired. *Journal of Visual Impairment & Blindness*. 2010;104(7):391-403.
25. Hoeksema AR, Spoorenberg S, Peters LL, et al. Elderly with remaining teeth report less frailty and better quality of life than edentulous elderly: a cross-sectional study. *Oral Dis*. 2017;23(4):526-36.10.1111/odi.12644.
26. Horgen G, Eilertsen G, Falkenberg H. Lighting old age - how lighting impacts the ability to grow old in own housing, part one. *Work*. 2012;41 Suppl 1:3385-7.10.3233/wor-2012-0612-3385.
27. Houston DK, Tooze JA, Davis CC, et al. Serum 25-hydroxyvitamin D and physical function in older adults: the Cardiovascular Health Study All Stars. *J Am Geriatr Soc*. 2011;59(10):1793-801.10.1111/j.1532-5415.2011.03601.x.
28. Idland G, Rydwick E, Smastuen MC, et al. Predictors of mobility in community-dwelling women aged 85 and older. *Disabil Rehabil*. 2013;35(11):881-7.10.3109/09638288.2012.712195.
29. Iwarsson S, Horstmann V, Carlsson G, et al. Person-environment fit predicts falls in older adults better than the consideration of environmental hazards only. *Clin Rehabil*. 2009;23(6):558-67.10.1177/0269215508101740.
30. Landi F, Russo A, Liperoti R, et al. Anorexia, physical function, and incident disability among the frail elderly population: Results from the iLSIRENTE study. *Journal of the American Medical Directors Association*. 2010;11(4):268-74.10.1016/j.jamda.2009.12.088.
31. Landi F, Russo A, Liperoti R, et al. Midarm muscle circumference, physical performance and mortality: Results from the aging and longevity study in the Sirente geographic area (iLSIRENTE study). *Clin Nutr*. 2010;29(4):441-7.10.1016/j.clnu.2009.12.006.
32. Laudisio A, Marzetti E, Antonica L, et al. Metabolic syndrome and quality of life in the elderly: Age and gender differences. *Eur J Nutr*. 2013;52(1):307-16.

- 1  
2  
3 33. Laudisio A, Marzetti E, Franceschi F, et al. Disability is associated with emergency room  
4 visits in the elderly: a population-based study. *Aging Clin Exp Res*. 2015;27(5):663-  
5 71.10.1007/s40520-015-0324-5.
- 6  
7 34. Laudisio A, Marzetti E, Pagano F, et al. Masticatory dysfunction is associated with worse  
8 functional ability: a population-based study. *J Clin Periodontol*. 2010;37(2):113-  
9 9.10.1111/j.1600-051X.2009.01518.x.
- 10  
11 35. Lofqvist C, Tomsone S, Iwarsson S, et al. Changes in Home and Health over Nine Years  
12 among very Old People in Latvia - Results from the ENABLE-AGE Project. *Journal of cross-*  
13 *cultural gerontology*. 2017;32(1):17-29.
- 14  
15 36. Mangani I, Cesari M, Russo A, et al. Physical function, physical activity and recent falls.  
16 Results from the 'Invecchiamento e Longevità nel Sirente (ilSIRENTE)' Study. *Aging Clinical*  
17 *& Experimental Research*. 2008;20(3):234-41.
- 18  
19 37. Mänty M, Rantanen T, Era P, et al. Fatigue and depressive symptoms in older people. *J Appl*  
20 *Gerontol*. 2014;33(4):505-14.10.1177/0733464812454011.
- 21  
22 38. Mikkola TM, Polku H, Portegijs E, et al. Self-reported hearing is associated with time spent  
23 out-of-home and withdrawal from leisure activities in older community-dwelling adults. *Aging*  
24 *Clin Exp Res*. 2016;28(2):297-302.10.1007/s40520-015-0389-1.
- 25  
26 39. Mikkola TM, Portegijs E, Rantakokko M, et al. Association of self-reported hearing difficulty to  
27 objective and perceived participation outside the home in older community-dwelling adults. *J*  
28 *Aging Health*. 2015;27(1):103-22.10.1177/0898264314538662.
- 29  
30 40. Murabito JM, Pencina MJ, Kelly-Hayes M, et al. Temporal trends in self-reported functional  
31 limitations and physical disability among the community-dwelling elderly population: the  
32 Framingham Heart Study. *Am J Public Health*. 2008;98(7):1256-  
33 62.10.2105/AJPH.2007.128132.
- 34  
35 41. Muscari A, Bianchi G, Forti P, et al. Physical Activity and Other Determinants of Survival in  
36 the Oldest Adults. *J Am Geriatr Soc*. 2017;65(2):402-6.10.1111/jgs.14569.
- 37  
38 42. Nitsch D, Mann AG, Bulpitt C, et al. Impairment of kidney function and reduced quality-of-life  
39 in older people: A cross-sectional study. *Age Ageing*. 2011;40(3):381-  
40 7.10.1093/ageing/afr024.
- 41  
42 43. Nykänen I, Lönnroos E, Kautiainen H, et al. Nutritional screening in a population-based  
43 cohort of community-dwelling older people. *European Journal of Public Health*.  
44 2013;23(3):405-9.10.1093/eurpub/cks026.
- 45  
46 44. Polku H, Mikkola TM, Rantakokko M, et al. Self-reported hearing difficulties and changes in  
47 life-space mobility among community-dwelling older adults: a Two-year follow-Up study.  
48 *BMC Geriatr*. 2015;15:121.10.1186/s12877-015-0119-8.
- 49  
50 45. Portegijs E, Rantakokko M, Viljanen A, et al. Is frailty associated with life-space mobility and  
51 perceived autonomy in participation outdoors? A longitudinal study. *Age & Ageing*.  
52 2016;45(4):550-3.10.1093/ageing/afw072.
- 53  
54 46. Quail JM, Addona V, Wolfson C, et al. Association of unmet need with self-rated health in a  
55 community dwelling cohort of disabled seniors 75 years of age and over. *European Journal*  
56 *of Ageing*. 2007;4(1):45-55.10.1007/s10433-007-0042-8.
- 57  
58 47. Rantakokko M, Iwarsson S, Vahaluoto S, et al. Perceived environmental barriers to outdoor  
59 mobility and feelings of loneliness among community-dwelling older people. *Journals of*  
60 *Gerontology - Series A Biological Sciences and Medical Sciences*. 2014;69(12):1562-  
8.10.1093/gerona/glu069.
48. Rantakokko M, Portegijs E, Viljanen A, et al. Mobility Modification Alleviates Environmental  
Influence on Incident Mobility Difficulty among Community-Dwelling Older People: A Two-  
Year Follow-Up Study. *PLoS ONE*. 2016;11(4):e0154396.10.1371/journal.pone.0154396.

- 1
- 2
- 3 49. Rantz M, Lane K, Phillips LJ, et al. Enhanced registered nurse care coordination with sensor  
4 technology: Impact on length of stay and cost in aging in place housing. *Nurs Outlook*.  
5 2015;63(6):650-5.10.1016/j.outlook.2015.08.004.
- 6
- 7 50. Rao SK, Wallace LMK, Theou O, et al. Is it better to be happy or not depressed? Depression  
8 mediates the effect of psychological well-being on adverse health outcomes in older adults.  
9 *Int J Geriatr Psychiatry*. 2016.10.1002/gps.4559.
- 10
- 11 51. Rapo-Pylkko S, Haanpaa M, Liira H. Chronic pain among community-dwelling elderly: a  
12 population-based clinical study. *Scand J Prim Health Care*. 2016;34(2):159-  
13 64.10.3109/02813432.2016.1160628.
- 14
- 15 52. Rydwick E, Frändin K, Akner G. Effects of a physical training and nutritional intervention  
16 program in frail elderly people regarding habitual physical activity level and activities of daily  
17 living-A randomized controlled pilot study. *Arch Gerontol Geriatr*. 2010;51(3):283-  
18 9.10.1016/j.archger.2009.12.001.
- 19
- 20 53. Rydwick E, Lammes E, Frändin K, et al. Effects of a physical and nutritional intervention  
21 program for frail elderly people over age 75. A randomized controlled pilot treatment trial.  
22 *Aging Clinical and Experimental Research*. 2008;20(2):159-70.
- 23
- 24 54. Sabayan B, Oleksik AM, Maier AB, et al. High blood pressure and resilience to physical and  
25 cognitive decline in the oldest old: The Leiden 85-Plus Study. *J Am Geriatr Soc*.  
26 2012;60(11):2014-9.
- 27
- 28 55. Sampson EL, Bulpitt CJ, Fletcher AE. Survival of Community-dwelling older people: The  
29 effect of cognitive impairment and social engagement. *J Am Geriatr Soc*. 2009;57(6):985-91.
- 30
- 31 56. Savikko N, Routasalo P, Tilvis R, et al. Psychosocial group rehabilitation for lonely older  
32 people: Favourable processes and mediating factors of the intervention leading to alleviated  
33 loneliness. *International Journal of Older People Nursing*. 2010;5(1):16-24.10.1111/j.1748-  
34 3743.2009.00191.x.
- 35
- 36 57. Sixsmith J, Sixsmith A, Fange AM, et al. Healthy ageing and home: The perspectives of very  
37 old people in five european countries. *Soc Sci Med*. 2014;106:1-9.
- 38
- 39 58. Thompson HJ, Demiris G, Rue T, et al. A Holistic approach to assess older adults' wellness  
40 using e-health technologies. *Telemedicine journal and e-health : the official journal of the*  
41 *American Telemedicine Association*. 2011;17(10):794-800.
- 42
- 43 59. Tsai LT, Portegijs E, Rantakokko M, et al. The association between objectively measured  
44 physical activity and life-space mobility among older people. *Scand J Med Sci Sports*.  
45 2015;25(4):e368-73.10.1111/sms.12337.
- 46
- 47 60. Tsai LT, Rantakokko M, Portegijs E, et al. Environmental mobility barriers and walking for  
48 errands among older people who live alone vs. with others. *BMC Public Health*.  
49 2013;13(1).10.1186/1471-2458-13-1054.
- 50
- 51 61. van Bommel T, Delgado V, Bax JJ, et al. Impact of valvular heart disease on activities of  
52 daily living of nonagenarians: the Leiden 85-plus study a population based study. *BMC*  
53 *Geriatr*. 2010;10:17.10.1186/1471-2318-10-17.
- 54
- 55 62. van Houwelingen AH, den Elzen WP, le Cessie S, et al. Consequences of interaction of  
56 functional, somatic, mental and social problems in community-dwelling older people. *PLoS*  
57 *ONE*. 2015;10(4):e0121013.10.1371/journal.pone.0121013.
- 58
- 59 63. Vestergaard S, Kronborg C, Puggaard L. Home-based video exercise intervention for  
60 community-dwelling frail older women: A randomized controlled trial. *Aging Clin Exp Res*.  
61 2008;20(5):479-86.
- 62
- 63 64. Wang K, Delbaere K, Brodie M, et al. Differences between Gait on Stairs and Flat Surfaces  
64 in Relation to Fall Risk and Future Falls. *IEEE journal of biomedical and health informatics*.  
65 2017.10.1109/jbhi.2017.2677901.
- 66
- 67 65. Williams ID, O'Doherty LJ, Mitchell GK, et al. Identifying unmet needs in older patients:  
68 Nurse-GP collaboration in general practice. *Aust Fam Physician*. 2007;36(9):772-6.



- 1  
2  
3 66. Wilson K, Mottram P, Sixsmith A. Depressive symptoms in the very old living alone:  
4 Prevalence, incidence and risk factors. *Int J Geriatr Psychiatry*. 2007;22(4):361-  
5 6.10.1002/gps.1682.  
6  
7 67. Young Y. Factors Associated With Permanent Transition From Independent Living to  
8 Nursing Home in a Continuing Care Retirement Community. *Journal of the American Medical*  
9 *Directors Association*. 2009;10(7):491-7.10.1016/j.jamda.2009.03.019.  
10  
11 68. Zingmond DS, Ettner SL, Wilber KH, et al. Association of claims-based quality of care  
12 measures with outcomes among community-dwelling vulnerable elders. *Med Care*.  
13 2011;49(6):553-9.10.1097/MLR.0b013e31820e5aab.  
14  
15  
16  
17  
18  
19  
20  
21  
22  
23  
24  
25  
26  
27  
28  
29  
30  
31  
32  
33  
34  
35  
36  
37  
38  
39  
40  
41  
42  
43  
44  
45  
46  
47  
48  
49  
50  
51  
52  
53  
54  
55  
56  
57  
58  
59  
60

For peer review only

## Appendix C

## Characteristics of included studies

| Study                    | Methods |                                                        |                                                                                |                                                            |                | Demographics       |        |               |  |
|--------------------------|---------|--------------------------------------------------------|--------------------------------------------------------------------------------|------------------------------------------------------------|----------------|--------------------|--------|---------------|--|
|                          | Country | Design                                                 | Type of intervention<br>(if applicable)                                        | Type of control<br>(if applicable)                         | Sample<br>size | Type of<br>sample  | Age    | Female<br>(%) |  |
| Aartolahti et al. (2013) | Finland | cross-sectional study                                  | multidisciplinary intervention, focused on medication, nutrition, and exercise | n/a                                                        | 576            | community-dwelling | 76-100 | 70.0          |  |
| Abellan et al. (2013)    | France  | cross-sectional study                                  | n/a                                                                            | n/a                                                        | 3,025          | community-dwelling | ≥75    | 100.0         |  |
| Ahluwalia et al. (2010)  | USA     | qualitative study using interviews and grounded theory | n/a                                                                            | n/a                                                        | 23             | community-dwelling | ≥78    | 61.0          |  |
| Behm et al. (2015)       | Sweden  | RCT with follow-up after 1 and 2 years                 | preventive home visit group, senior meeting group                              | access to the ordinary range of services for older persons | 459            | community-dwelling | 80-97  | 64.0          |  |
| Berkemeyer et al. (2009) | Germany | cross-sectional study                                  | n/a                                                                            | n/a                                                        | 440            | community-dwelling | ≥75    | 44.8          |  |
| Blain et al. (2010)      | France  | longitudinal study                                     | n/a                                                                            | n/a                                                        | 1300           | community-dwelling | ≥75    | 100.0         |  |
| Bollwein et al. (2013)   | Germany | cross-sectional study                                  | n/a                                                                            | n/a                                                        | 192            | community-dwelling | 75-96  | 64.6          |  |
| Brown et al. (2016)      | USA     | longitudinal cohort study                              | n/a                                                                            | n/a                                                        | 410            | community-dwelling | ≥75    | 57.0          |  |

|    |                     |           |                                                                         |                                                                                                                                                                                  |                                                                           |     |                    |       |       |  |
|----|---------------------|-----------|-------------------------------------------------------------------------|----------------------------------------------------------------------------------------------------------------------------------------------------------------------------------|---------------------------------------------------------------------------|-----|--------------------|-------|-------|--|
| 1  |                     |           |                                                                         |                                                                                                                                                                                  |                                                                           |     |                    |       |       |  |
| 2  |                     |           |                                                                         |                                                                                                                                                                                  |                                                                           |     |                    |       |       |  |
| 3  | Byles et al.        | Australia | cross-sectional study                                                   | n/a                                                                                                                                                                              | n/a                                                                       | 260 | community-dwelling | 75-80 | 50.4  |  |
| 4  | (2015)              |           |                                                                         |                                                                                                                                                                                  |                                                                           |     |                    |       |       |  |
| 5  |                     |           |                                                                         |                                                                                                                                                                                  |                                                                           |     |                    |       |       |  |
| 6  | Calvert et al.      | USA       | cross-sectional study                                                   | n/a                                                                                                                                                                              | n/a                                                                       | 306 | community-dwelling | ≥85   | 62.0  |  |
| 7  | (2009)              |           |                                                                         |                                                                                                                                                                                  |                                                                           |     |                    |       |       |  |
| 8  |                     |           |                                                                         |                                                                                                                                                                                  |                                                                           |     |                    |       |       |  |
| 9  | Chipperfield et al. | Canada    | prospective cohort study                                                | n/a                                                                                                                                                                              | n/a                                                                       | 198 | community-dwelling | 80-98 | 63.1  |  |
| 10 | (2008)              |           |                                                                         |                                                                                                                                                                                  |                                                                           |     |                    |       |       |  |
| 11 |                     |           |                                                                         |                                                                                                                                                                                  |                                                                           |     |                    |       |       |  |
| 12 | Diez-Ruiz et al.    | Spain     | prospective cohort study with 2 years follow-up                         | n/a                                                                                                                                                                              | n/a                                                                       | 215 | community dwelling | ≥75   | 63.0  |  |
| 13 | (2016)              |           |                                                                         |                                                                                                                                                                                  |                                                                           |     |                    |       |       |  |
| 14 |                     |           |                                                                         |                                                                                                                                                                                  |                                                                           |     |                    |       |       |  |
| 15 | Eckerblad et al.    | Sweden    | qualitative study using semi-structured interviews and content analysis | n/a                                                                                                                                                                              | n/a                                                                       | 20  | community-dwelling | 79-89 | 80.0  |  |
| 16 | (2015)              |           |                                                                         |                                                                                                                                                                                  |                                                                           |     |                    |       |       |  |
| 17 |                     |           |                                                                         |                                                                                                                                                                                  |                                                                           |     |                    |       |       |  |
| 18 | El-Khoury et al.    | France    | RCT                                                                     | 2-year exercise programme of progressive balance retraining in reducing injurious falls, weekly supervised group sessions supplemented by individually prescribed home exercises | brochures about fall prevention, newsletters, four free exercise sessions | 706 | community-dwelling | 75-85 | 100.0 |  |
| 19 | (2015)              |           |                                                                         |                                                                                                                                                                                  |                                                                           |     |                    |       |       |  |
| 20 |                     |           |                                                                         |                                                                                                                                                                                  |                                                                           |     |                    |       |       |  |
| 21 |                     |           |                                                                         |                                                                                                                                                                                  |                                                                           |     |                    |       |       |  |
| 22 |                     |           |                                                                         |                                                                                                                                                                                  |                                                                           |     |                    |       |       |  |
| 23 |                     |           |                                                                         |                                                                                                                                                                                  |                                                                           |     |                    |       |       |  |
| 24 |                     |           |                                                                         |                                                                                                                                                                                  |                                                                           |     |                    |       |       |  |
| 25 |                     |           |                                                                         |                                                                                                                                                                                  |                                                                           |     |                    |       |       |  |
| 26 | Eronen et al.       | Finland   | cross-sectional study                                                   | n/a                                                                                                                                                                              | n/a                                                                       | 848 | community-dwelling | 75-90 | 62.0  |  |
| 27 | (2016)              |           |                                                                         |                                                                                                                                                                                  |                                                                           |     |                    |       |       |  |
| 28 |                     |           |                                                                         |                                                                                                                                                                                  |                                                                           |     |                    |       |       |  |
| 29 |                     |           |                                                                         |                                                                                                                                                                                  |                                                                           |     |                    |       |       |  |
| 30 |                     |           |                                                                         |                                                                                                                                                                                  |                                                                           |     |                    |       |       |  |
| 31 |                     |           |                                                                         |                                                                                                                                                                                  |                                                                           |     |                    |       |       |  |
| 32 |                     |           |                                                                         |                                                                                                                                                                                  |                                                                           |     |                    |       |       |  |
| 33 | Fabre et al.        | USA       | population-based cohort study                                           | n/a                                                                                                                                                                              | n/a                                                                       | 74  | community-dwelling | ≥90   | 51.3  |  |
| 34 | (2007)              |           |                                                                         |                                                                                                                                                                                  |                                                                           |     |                    |       |       |  |
| 35 |                     |           |                                                                         |                                                                                                                                                                                  |                                                                           |     |                    |       |       |  |
| 36 |                     |           |                                                                         |                                                                                                                                                                                  |                                                                           |     |                    |       |       |  |
| 37 |                     |           |                                                                         |                                                                                                                                                                                  |                                                                           |     |                    |       |       |  |
| 38 |                     |           |                                                                         |                                                                                                                                                                                  |                                                                           |     |                    |       |       |  |
| 39 |                     |           |                                                                         |                                                                                                                                                                                  |                                                                           |     |                    |       |       |  |
| 40 |                     |           |                                                                         |                                                                                                                                                                                  |                                                                           |     |                    |       |       |  |
| 41 |                     |           |                                                                         |                                                                                                                                                                                  |                                                                           |     |                    |       |       |  |
| 42 |                     |           |                                                                         |                                                                                                                                                                                  |                                                                           |     |                    |       |       |  |
| 43 |                     |           |                                                                         |                                                                                                                                                                                  |                                                                           |     |                    |       |       |  |
| 44 |                     |           |                                                                         |                                                                                                                                                                                  |                                                                           |     |                    |       |       |  |
| 45 |                     |           |                                                                         |                                                                                                                                                                                  |                                                                           |     |                    |       |       |  |
| 46 |                     |           |                                                                         |                                                                                                                                                                                  |                                                                           |     |                    |       |       |  |

|    |                           |         |                                                           |                                                   |                                                                                    |       |                    |       |       |
|----|---------------------------|---------|-----------------------------------------------------------|---------------------------------------------------|------------------------------------------------------------------------------------|-------|--------------------|-------|-------|
| 1  |                           |         |                                                           |                                                   |                                                                                    |       |                    |       |       |
| 2  |                           |         |                                                           |                                                   |                                                                                    |       |                    |       |       |
| 3  | Formiga et al. (2014)     | Spain   | longitudinal study                                        | n/a                                               | n/a                                                                                | 167   | community-dwelling | ≥85   | 60.5  |
| 4  |                           |         |                                                           |                                                   |                                                                                    |       |                    |       |       |
| 5  | Formiga et al. (2016)     | Spain   | RCT with 5-year follow-up                                 | falls and malnutrition prevention                 | general primary care assessment                                                    | 328   | community-dwelling | ≥85   | 61.6  |
| 6  |                           |         |                                                           |                                                   |                                                                                    |       |                    |       |       |
| 7  | Fritel et al. (2013)      | France  | observational cross-sectional study                       | n/a                                               | n/a                                                                                | 1,942 | community-dwelling | 75-85 | 100.0 |
| 8  |                           |         |                                                           |                                                   |                                                                                    |       |                    |       |       |
| 9  |                           |         |                                                           |                                                   |                                                                                    |       |                    |       |       |
| 10 |                           |         |                                                           |                                                   |                                                                                    |       |                    |       |       |
| 11 |                           |         |                                                           |                                                   |                                                                                    |       |                    |       |       |
| 12 | Gustafsson et al. (2013)  | Sweden  | RCT                                                       | preventive home visit group, senior meeting group | ordinary range of community services offered by the municipal care for the aged    | 459   | community-dwelling | 80-97 | 64.0  |
| 13 |                           |         |                                                           |                                                   |                                                                                    |       |                    |       |       |
| 14 |                           |         |                                                           |                                                   |                                                                                    |       |                    |       |       |
| 15 |                           |         |                                                           |                                                   |                                                                                    |       |                    |       |       |
| 16 |                           |         |                                                           |                                                   |                                                                                    |       |                    |       |       |
| 17 | Gustafsson et al. (2012)  | Sweden  | RCT                                                       | preventive home visit group, senior meeting group | access to the ordinary range of community services offered by the municipal agency | 459   | community-dwelling | 80-97 | 64.0  |
| 18 |                           |         |                                                           |                                                   |                                                                                    |       |                    |       |       |
| 19 |                           |         |                                                           |                                                   |                                                                                    |       |                    |       |       |
| 20 |                           |         |                                                           |                                                   |                                                                                    |       |                    |       |       |
| 21 |                           |         |                                                           |                                                   |                                                                                    |       |                    |       |       |
| 22 |                           |         |                                                           |                                                   |                                                                                    |       |                    |       |       |
| 23 | Hammar et al. (2014)      | Sweden  | qualitative study using interviews and grounded theory    | n/a                                               | n/a                                                                                | 11    | community-dwelling | 84-95 | 54.5  |
| 24 |                           |         |                                                           |                                                   |                                                                                    |       |                    |       |       |
| 25 |                           |         |                                                           |                                                   |                                                                                    |       |                    |       |       |
| 26 |                           |         |                                                           |                                                   |                                                                                    |       |                    |       |       |
| 27 |                           |         |                                                           |                                                   |                                                                                    |       |                    |       |       |
| 28 |                           |         |                                                           |                                                   |                                                                                    |       |                    |       |       |
| 29 | Hegendörfer et al. (2017) | Belgium | prospective, observational, population based cohort study | n/a                                               | n/a                                                                                | 501   | community-dwelling | ≥80   | 63.0  |
| 30 |                           |         |                                                           |                                                   |                                                                                    |       |                    |       |       |
| 31 |                           |         |                                                           |                                                   |                                                                                    |       |                    |       |       |
| 32 |                           |         |                                                           |                                                   |                                                                                    |       |                    |       |       |
| 33 |                           |         |                                                           |                                                   |                                                                                    |       |                    |       |       |
| 34 | Heyl & Wahl (2010)        | Germany | cross-sectional study                                     | n/a                                               | n/a                                                                                | 271   | community-dwelling | 75-94 | 54    |
| 35 |                           |         |                                                           |                                                   |                                                                                    |       |                    |       |       |
| 36 |                           |         |                                                           |                                                   |                                                                                    |       |                    |       |       |
| 37 |                           |         |                                                           |                                                   |                                                                                    |       |                    |       |       |
| 38 |                           |         |                                                           |                                                   |                                                                                    |       |                    |       |       |
| 39 |                           |         |                                                           |                                                   |                                                                                    |       |                    |       |       |
| 40 |                           |         |                                                           |                                                   |                                                                                    |       |                    |       |       |
| 41 |                           |         |                                                           |                                                   |                                                                                    |       |                    |       |       |
| 42 |                           |         |                                                           |                                                   |                                                                                    |       |                    |       |       |
| 43 |                           |         |                                                           |                                                   |                                                                                    |       |                    |       |       |
| 44 |                           |         |                                                           |                                                   |                                                                                    |       |                    |       |       |
| 45 |                           |         |                                                           |                                                   |                                                                                    |       |                    |       |       |
| 46 |                           |         |                                                           |                                                   |                                                                                    |       |                    |       |       |

|    |              |           |               |     |     |                |            |        |       |  |
|----|--------------|-----------|---------------|-----|-----|----------------|------------|--------|-------|--|
| 1  |              |           |               |     |     |                |            |        |       |  |
| 2  |              |           |               |     |     |                |            |        |       |  |
| 3  | Hoeksema     | Netherlan | cross-        | n/a | n/a | 1026           | community- | ≥75    | 59.0  |  |
| 4  | et al.       | ds        | sectional     |     |     |                | dwelling   |        |       |  |
| 5  | (2017)       |           | study         |     |     |                |            |        |       |  |
| 6  |              |           |               |     |     |                |            |        |       |  |
| 7  | Horgen et    | Norway    | mixed         | n/a | n/a | 165            | community- | 75     | n/a   |  |
| 8  | al. (2012)   |           | methods       |     |     |                | dwelling   |        |       |  |
| 9  |              |           | study         |     |     |                |            |        |       |  |
| 10 | Houston et   | USA       | secondary     | n/a | n/a | 988            | community- | 77-100 | 64.5  |  |
| 11 | al. (2011)   |           | analysis of a |     |     |                | dwelling   |        |       |  |
| 12 |              |           | longitudinal  |     |     |                |            |        |       |  |
| 13 |              |           | study with 3  |     |     |                |            |        |       |  |
| 14 |              |           | years of      |     |     |                |            |        |       |  |
| 15 |              |           | follow-up     |     |     |                |            |        |       |  |
| 16 |              |           |               |     |     |                |            |        |       |  |
| 17 | Idland et    | Norway    | prospective , | n/a | n/a | 307 (baseline) | community- | 75-92  | 100.0 |  |
| 18 | al. (2013)   |           | observational |     |     | 113 (follow-   | dwelling   |        |       |  |
| 19 |              |           | cohort study  |     |     | up)            |            |        |       |  |
| 20 |              |           | with 9 years  |     |     |                |            |        |       |  |
| 21 |              |           | follow-up     |     |     |                |            |        |       |  |
| 22 |              |           |               |     |     |                |            |        |       |  |
| 23 | Iwarsson et  | Sweden,   | secondary     | n/a | n/a | 834            | community- | 75-89  | 79.7  |  |
| 24 | al. (2009)   | Germany,  | analysis of a |     |     |                | dwelling   |        |       |  |
| 25 |              | Latvia    | longitudinal  |     |     |                |            |        |       |  |
| 26 |              |           | survey study  |     |     |                |            |        |       |  |
| 27 |              |           | with 1 year   |     |     |                |            |        |       |  |
| 28 |              |           | follow-up     |     |     |                |            |        |       |  |
| 29 | Landi et al. | Italy     | secondary     | n/a | n/a | 357            | community- | ≥80    | 67.0  |  |
| 30 | (2010a)      |           | analysis of a |     |     |                | dwelling   |        |       |  |
| 31 |              |           | prospective   |     |     |                |            |        |       |  |
| 32 |              |           | cohort study  |     |     |                |            |        |       |  |
| 33 |              |           | (baseline)    |     |     |                |            |        |       |  |
| 34 |              |           |               |     |     |                |            |        |       |  |
| 35 | Landi et al. | Italy     | secondary     | n/a | n/a | 364 (baseline) | community- | ≥80    | 67.0  |  |
| 36 | (2010b)      |           | analysis of a |     |     | 205 (follow-   | dwelling   |        |       |  |
| 37 |              |           | prospective   |     |     | up)            |            |        |       |  |
| 38 |              |           | cohort study  |     |     |                |            |        |       |  |
| 39 |              |           |               |     |     |                |            |        |       |  |
| 40 |              |           |               |     |     |                |            |        |       |  |
| 41 |              |           |               |     |     |                |            |        |       |  |
| 42 |              |           |               |     |     |                |            |        |       |  |
| 43 |              |           |               |     |     |                |            |        |       |  |
| 44 |              |           |               |     |     |                |            |        |       |  |
| 45 |              |           |               |     |     |                |            |        |       |  |
| 46 |              |           |               |     |     |                |            |        |       |  |

|    |             |          |               |     |     |     |            |       |      |
|----|-------------|----------|---------------|-----|-----|-----|------------|-------|------|
| 1  |             |          |               |     |     |     |            |       |      |
| 2  |             |          |               |     |     |     |            |       |      |
| 3  |             |          | with 2 years  |     |     |     |            |       |      |
| 4  |             |          | follow-up     |     |     |     |            |       |      |
| 5  |             |          |               |     |     |     |            |       |      |
| 6  | Laudisio et | Italy    | cross-        | n/a | n/a | 356 | community- | ≥75   | 54.5 |
| 7  | al. (2013)  |          | sectional     |     |     |     | dwelling   |       |      |
| 8  |             |          | study         |     |     |     |            |       |      |
| 9  | Laudisio et | Italy    | longitudinal, | n/a | n/a | 342 | community- | ≥75   | 56.0 |
| 10 | al. (2015)  |          | population-   |     |     |     | dwelling   |       |      |
| 11 |             |          | based study   |     |     |     |            |       |      |
| 12 |             |          | with 1-year   |     |     |     |            |       |      |
| 13 |             |          | follow-up     |     |     |     |            |       |      |
| 14 |             |          |               |     |     |     |            |       |      |
| 15 | Laudisio et | Italy    | cross-        | n/a | n/a | 350 | community- | ≥75   | 54.3 |
| 16 | al. (2010)  |          | sectional     |     |     |     | dwelling   |       |      |
| 17 |             |          | study         |     |     |     |            |       |      |
| 18 | Lofqvist et | Latvia   | secondary     | n/a | n/a | 59  | community- | 77-90 | 90.0 |
| 19 | al. (2017)  |          | analysis of a |     |     |     | dwelling   |       |      |
| 20 |             |          | longitudinal  |     |     |     |            |       |      |
| 21 |             |          | study with 9  |     |     |     |            |       |      |
| 22 |             |          | years follow- |     |     |     |            |       |      |
| 23 |             |          | up            |     |     |     |            |       |      |
| 24 |             |          |               |     |     |     |            |       |      |
| 25 | Mangani et  | Italy    | secondary     | n/a | n/a | 364 | community- | ≥80   | 67.0 |
| 26 | al. (2008)  |          | analysis of a |     |     |     | dwelling   |       |      |
| 27 |             |          | prospective   |     |     |     |            |       |      |
| 28 |             |          | cohort study  |     |     |     |            |       |      |
| 29 |             |          |               |     |     |     |            |       |      |
| 30 | Mänty et    | Denmark, | secondary     | n/a | n/a | 561 | community- | 75    | 55.0 |
| 31 | al. (2014)  | Finland  | analysis of a |     |     |     | dwelling   |       |      |
| 32 |             |          | longitudinal  |     |     |     |            |       |      |
| 33 |             |          | study         |     |     |     |            |       |      |
| 34 |             |          |               |     |     |     |            |       |      |
| 35 | Mikkola et  | Finland  | secondary     | n/a | n/a | 766 | community- | 75-90 | 62.7 |
| 36 | al. (2016)  |          | analysis of a |     |     |     | dwelling   |       |      |
| 37 |             |          | cross         |     |     |     |            |       |      |
| 38 |             |          | sectional and |     |     |     |            |       |      |
| 39 |             |          |               |     |     |     |            |       |      |
| 40 |             |          |               |     |     |     |            |       |      |
| 41 |             |          |               |     |     |     |            |       |      |
| 42 |             |          |               |     |     |     |            |       |      |
| 43 |             |          |               |     |     |     |            |       |      |
| 44 |             |          |               |     |     |     |            |       |      |
| 45 |             |          |               |     |     |     |            |       |      |
| 46 |             |          |               |     |     |     |            |       |      |



|    |              |         |                |                     |                        |                |                 |           |      |  |
|----|--------------|---------|----------------|---------------------|------------------------|----------------|-----------------|-----------|------|--|
| 1  |              |         |                |                     |                        |                |                 |           |      |  |
| 2  |              |         |                |                     |                        |                |                 |           |      |  |
| 3  | Quail et al. | Canada  | secondary      | n/a                 | n/a                    | 508            | community-      | 75-96     | 66.9 |  |
| 4  | (2007)       |         | analysis of a  |                     |                        |                | dwelling        |           |      |  |
| 5  |              |         | population-    |                     |                        |                |                 |           |      |  |
| 6  |              |         | based cohort   |                     |                        |                |                 |           |      |  |
| 7  |              |         | study          |                     |                        |                |                 |           |      |  |
| 8  |              |         |                |                     |                        |                |                 |           |      |  |
| 9  | Rantakokk    | Finland | secondary      | n/a                 | n/a                    | 847            | community-      | 75-90     | 62.0 |  |
| 10 | o et al.     |         | analysis of a  |                     |                        |                | dwelling        |           |      |  |
| 11 | (2014)       |         | cross-         |                     |                        |                |                 |           |      |  |
| 12 |              |         | sectional      |                     |                        |                |                 |           |      |  |
| 13 |              |         | study          |                     |                        |                |                 |           |      |  |
| 14 |              |         | (baseline      |                     |                        |                |                 |           |      |  |
| 15 |              |         | data)          |                     |                        |                |                 |           |      |  |
| 16 |              |         |                |                     |                        |                |                 |           |      |  |
| 17 | Rantakokk    | Finland | secondary      | n/a                 | n/a                    | 848            | community-      | 75-90     | 62.0 |  |
| 18 | o et al.     |         | analysis of a  |                     |                        | (baseline),    | dwelling        |           |      |  |
| 19 | (2016)       |         | cross-         |                     |                        | 816 (1         |                 |           |      |  |
| 20 |              |         | sectional      |                     |                        | year follow-   |                 |           |      |  |
| 21 |              |         | study          |                     |                        | up),           |                 |           |      |  |
| 22 |              |         | (baseline data |                     |                        | 761 (2         |                 |           |      |  |
| 23 |              |         | & follow-up)   |                     |                        | years follow - |                 |           |      |  |
| 24 |              |         |                |                     |                        | up)            |                 |           |      |  |
| 25 | Rantz et al. | USA     | secondary      | living with sensors | living without sensors | 133            | residents of    | mean      | 64.7 |  |
| 26 | (2015)       |         | analysis of a  |                     |                        |                | independent     | age: 83   |      |  |
| 27 |              |         | cross-         |                     |                        |                | living facility |           |      |  |
| 28 |              |         | sectional      |                     |                        |                |                 |           |      |  |
| 29 |              |         | study          |                     |                        |                |                 |           |      |  |
| 30 |              |         |                |                     |                        |                |                 |           |      |  |
| 31 | Rao et al.   | Canada  | secondary      | n/a                 | n/a                    | 1,668          | community-      | mean      | 58.0 |  |
| 32 | (2016)       |         | analysis of a  |                     |                        |                | dwelling        | age: 82.9 |      |  |
| 33 |              |         | cross-         |                     |                        |                |                 | (SD 6.9)  |      |  |
| 34 |              |         | sectional      |                     |                        |                |                 |           |      |  |
| 35 |              |         | study          |                     |                        |                |                 |           |      |  |
| 36 |              |         |                |                     |                        |                |                 |           |      |  |
| 37 | Rapo-        | Finland | cross-         | n/a                 | n/a                    | 106            | community-      | 75-85     | 74.0 |  |
| 38 | Pylkko et    |         | sectional      |                     |                        |                | dwelling        |           |      |  |
| 39 | al. (2016)   |         | study          |                     |                        |                |                 |           |      |  |
| 40 |              |         |                |                     |                        |                |                 |           |      |  |
| 41 |              |         |                |                     |                        |                |                 |           |      |  |
| 42 |              |         |                |                     |                        |                |                 |           |      |  |
| 43 |              |         |                |                     |                        |                |                 |           |      |  |
| 44 |              |         |                |                     |                        |                |                 |           |      |  |
| 45 |              |         |                |                     |                        |                |                 |           |      |  |
| 46 |              |         |                |                     |                        |                |                 |           |      |  |



|    |                       |             |                                                                                             |                                                                                                                                                                                                                                                                                                                                                   |                                                        |        |                    |     |      |
|----|-----------------------|-------------|---------------------------------------------------------------------------------------------|---------------------------------------------------------------------------------------------------------------------------------------------------------------------------------------------------------------------------------------------------------------------------------------------------------------------------------------------------|--------------------------------------------------------|--------|--------------------|-----|------|
| 1  |                       |             |                                                                                             |                                                                                                                                                                                                                                                                                                                                                   |                                                        |        |                    |     |      |
| 2  |                       |             |                                                                                             |                                                                                                                                                                                                                                                                                                                                                   |                                                        |        |                    |     |      |
| 3  | Rydwik et al. (2010)  | Sweden      | RCT 24 month follow-up                                                                      | 1) nutritional treatment (individual dietary counseling + 5 group sessions + general physical training advice)<br>2) physical training (regular physical group training of approx. 1h, twice a week for 12 weeks +general diet advice)<br>3) Training & nutrition (specific physical training & specific diet counseling/group session education) | general physical training advice & general diet advice | 96     | community-dwelling | ≥75 | 60.4 |
| 4  |                       |             |                                                                                             |                                                                                                                                                                                                                                                                                                                                                   |                                                        |        |                    |     |      |
| 5  |                       |             |                                                                                             |                                                                                                                                                                                                                                                                                                                                                   |                                                        |        |                    |     |      |
| 6  |                       |             |                                                                                             |                                                                                                                                                                                                                                                                                                                                                   |                                                        |        |                    |     |      |
| 7  |                       |             |                                                                                             |                                                                                                                                                                                                                                                                                                                                                   |                                                        |        |                    |     |      |
| 8  |                       |             |                                                                                             |                                                                                                                                                                                                                                                                                                                                                   |                                                        |        |                    |     |      |
| 9  |                       |             |                                                                                             |                                                                                                                                                                                                                                                                                                                                                   |                                                        |        |                    |     |      |
| 10 |                       |             |                                                                                             |                                                                                                                                                                                                                                                                                                                                                   |                                                        |        |                    |     |      |
| 11 |                       |             |                                                                                             |                                                                                                                                                                                                                                                                                                                                                   |                                                        |        |                    |     |      |
| 12 |                       |             |                                                                                             |                                                                                                                                                                                                                                                                                                                                                   |                                                        |        |                    |     |      |
| 13 |                       |             |                                                                                             |                                                                                                                                                                                                                                                                                                                                                   |                                                        |        |                    |     |      |
| 14 |                       |             |                                                                                             |                                                                                                                                                                                                                                                                                                                                                   |                                                        |        |                    |     |      |
| 15 |                       |             |                                                                                             |                                                                                                                                                                                                                                                                                                                                                   |                                                        |        |                    |     |      |
| 16 | Rydwik et al. (2008)  | Sweden      | RCT                                                                                         | 1) nutrition (diet counseling/group session education + general physical training advice)<br>2) training (specific physical training + general diet advice)<br>3) Training & nutrition (specific physical training & specific diet counseling/group session education)                                                                            | general physical training advice & general diet advice | 96     | community-dwelling | ≥75 | 60.4 |
| 17 |                       |             |                                                                                             |                                                                                                                                                                                                                                                                                                                                                   |                                                        |        |                    |     |      |
| 18 |                       |             |                                                                                             |                                                                                                                                                                                                                                                                                                                                                   |                                                        |        |                    |     |      |
| 19 |                       |             |                                                                                             |                                                                                                                                                                                                                                                                                                                                                   |                                                        |        |                    |     |      |
| 20 |                       |             |                                                                                             |                                                                                                                                                                                                                                                                                                                                                   |                                                        |        |                    |     |      |
| 21 |                       |             |                                                                                             |                                                                                                                                                                                                                                                                                                                                                   |                                                        |        |                    |     |      |
| 22 |                       |             |                                                                                             |                                                                                                                                                                                                                                                                                                                                                   |                                                        |        |                    |     |      |
| 23 |                       |             |                                                                                             |                                                                                                                                                                                                                                                                                                                                                   |                                                        |        |                    |     |      |
| 24 |                       |             |                                                                                             |                                                                                                                                                                                                                                                                                                                                                   |                                                        |        |                    |     |      |
| 25 |                       |             |                                                                                             |                                                                                                                                                                                                                                                                                                                                                   |                                                        |        |                    |     |      |
| 26 |                       |             |                                                                                             |                                                                                                                                                                                                                                                                                                                                                   |                                                        |        |                    |     |      |
| 27 | Sabayan et al. (2012) | Netherlands | population-based prospective follow-up study with cross-sectional and longitudinal analyses | n/a                                                                                                                                                                                                                                                                                                                                               | n/a                                                    | 572    | community-dwelling | ≥85 | 66.8 |
| 28 |                       |             |                                                                                             |                                                                                                                                                                                                                                                                                                                                                   |                                                        |        |                    |     |      |
| 29 |                       |             |                                                                                             |                                                                                                                                                                                                                                                                                                                                                   |                                                        |        |                    |     |      |
| 30 |                       |             |                                                                                             |                                                                                                                                                                                                                                                                                                                                                   |                                                        |        |                    |     |      |
| 31 |                       |             |                                                                                             |                                                                                                                                                                                                                                                                                                                                                   |                                                        |        |                    |     |      |
| 32 |                       |             |                                                                                             |                                                                                                                                                                                                                                                                                                                                                   |                                                        |        |                    |     |      |
| 33 |                       |             |                                                                                             |                                                                                                                                                                                                                                                                                                                                                   |                                                        |        |                    |     |      |
| 34 |                       |             |                                                                                             |                                                                                                                                                                                                                                                                                                                                                   |                                                        |        |                    |     |      |
| 35 |                       |             |                                                                                             |                                                                                                                                                                                                                                                                                                                                                   |                                                        |        |                    |     |      |
| 36 |                       |             |                                                                                             |                                                                                                                                                                                                                                                                                                                                                   |                                                        |        |                    |     |      |
| 37 | Sampson et al. (2009) | UK          | prospective cohort study                                                                    | n/a                                                                                                                                                                                                                                                                                                                                               | n/a                                                    | 10,720 | community-dwelling | ≥75 | 59.6 |
| 38 |                       |             |                                                                                             |                                                                                                                                                                                                                                                                                                                                                   |                                                        |        |                    |     |      |
| 39 |                       |             |                                                                                             |                                                                                                                                                                                                                                                                                                                                                   |                                                        |        |                    |     |      |
| 40 |                       |             |                                                                                             |                                                                                                                                                                                                                                                                                                                                                   |                                                        |        |                    |     |      |
| 41 |                       |             |                                                                                             |                                                                                                                                                                                                                                                                                                                                                   |                                                        |        |                    |     |      |
| 42 |                       |             |                                                                                             |                                                                                                                                                                                                                                                                                                                                                   |                                                        |        |                    |     |      |
| 43 |                       |             |                                                                                             |                                                                                                                                                                                                                                                                                                                                                   |                                                        |        |                    |     |      |
| 44 |                       |             |                                                                                             |                                                                                                                                                                                                                                                                                                                                                   |                                                        |        |                    |     |      |
| 45 |                       |             |                                                                                             |                                                                                                                                                                                                                                                                                                                                                   |                                                        |        |                    |     |      |
| 46 |                       |             |                                                                                             |                                                                                                                                                                                                                                                                                                                                                   |                                                        |        |                    |     |      |

1  
2  
3  
4  
5  
6  
7  
8  
9  
10  
11  
12  
13  
14  
15  
16  
17  
18  
19  
20  
21  
22  
23  
24  
25  
26  
27  
28  
29  
30  
31  
32  
33  
34  
35  
36  
37  
38  
39  
40  
41  
42  
43  
44  
45  
46

|                               |                                                      |                                                                                  |                                                                                                         |                                                           |                                       |                                                                 |       |      |
|-------------------------------|------------------------------------------------------|----------------------------------------------------------------------------------|---------------------------------------------------------------------------------------------------------|-----------------------------------------------------------|---------------------------------------|-----------------------------------------------------------------|-------|------|
| Savikko et al. (2010)         | Finland                                              | cross-sectional study within an RCT                                              | psychosocial group rehabilitation intervention                                                          | not named (participants were not considered for analysis) | 117                                   | community-dwelling and residents of independent living facility | 75-92 | 74.0 |
| Sixsmith et al. (2014)        | Hungary, Latvia, United Kingdom, Germany, and Sweden | qualitative study using in-depth, semi-structured interviews and grounded theory | n/a                                                                                                     | n/a                                                       | 190                                   | community-dwelling                                              | 75-89 | 61.6 |
| Thompson et al. (2011)        | USA                                                  | cross-sectional study                                                            | n/a                                                                                                     | n/a                                                       | 27                                    | inhabitants of an independent retirement community              | 78-94 | 67.0 |
| Tsai et al. (2015)            | Finland                                              | cross-sectional study                                                            | n/a                                                                                                     | n/a                                                       | 174                                   | community-dwelling                                              | 75-90 | 64.0 |
| Tsai et al. (2013)            | Finland                                              | cross-sectional study                                                            | n/a                                                                                                     | n/a                                                       | 657                                   | community-dwelling                                              | 75-81 | 75.0 |
| van Bommel et al. (2010)      | Netherlands                                          | prospective population-based study                                               | n/a                                                                                                     | n/a                                                       | 277                                   | community-dwelling                                              | ≥85   | 72.6 |
| van Houwelingen et al. (2015) | Netherlands                                          | cluster RCT                                                                      | care plan for people with a combination of problems at the functional, somatic, mental, or social level | usual care                                                | 2,681 (baseline)<br>2,172 (follow-up) | community-dwelling                                              | ≥75   | 68.3 |

For peer review only

|    |             |           |               |                                  |                          |        |                  |           |       |  |
|----|-------------|-----------|---------------|----------------------------------|--------------------------|--------|------------------|-----------|-------|--|
| 1  |             |           |               |                                  |                          |        |                  |           |       |  |
| 2  |             |           |               |                                  |                          |        |                  |           |       |  |
| 3  | Vestergaar  | Denmark   | RCT           | home-based video exercises;      | bi-weekly telephone call | 53     | community-       | 75-91     | 100.0 |  |
| 4  | d et al.    |           |               | 26min/day; 3 times/week; 5       |                          |        | dwelling         |           |       |  |
| 5  | (2008)      |           |               | months; bi-weekly telephone call |                          |        |                  |           |       |  |
| 6  |             |           |               |                                  |                          |        |                  |           |       |  |
| 7  | Wang et al. | Australia | cross-        | n/a                              | n/a                      | 81     | community-       | mean      | 44.4  |  |
| 8  | (2017)      |           | sectional     |                                  |                          |        | dwelling         | age: 83.8 |       |  |
| 9  |             |           | study         |                                  |                          |        |                  | (SD 3.83) |       |  |
| 10 | Williams et | Australia | cross-        | n/a                              | n/a                      | 546    | community-       | 75-96     | 68.0  |  |
| 11 | al. (2007)  |           | sectional     |                                  |                          |        | dwelling         |           |       |  |
| 12 |             |           | study         |                                  |                          |        |                  |           |       |  |
| 13 |             |           |               |                                  |                          |        |                  |           |       |  |
| 14 | Wilson et   | UK        | cross-        | n/a                              | n/a                      | 242    | community-       | 80-90     | 69.9  |  |
| 15 | al. (2007)  |           | sectional     |                                  |                          |        | dwelling         |           |       |  |
| 16 |             |           | study         |                                  |                          |        |                  |           |       |  |
| 17 | Young       | USA       | prospective   | n/a                              | n/a                      | 298    | people living    | 75-94     | 69.1  |  |
| 18 | (2009)      |           | cohort study  |                                  |                          |        | in the           |           |       |  |
| 19 |             |           |               |                                  |                          |        | independent      |           |       |  |
| 20 |             |           |               |                                  |                          |        | living unit of a |           |       |  |
| 21 |             |           |               |                                  |                          |        | continuing       |           |       |  |
| 22 |             |           |               |                                  |                          |        | care             |           |       |  |
| 23 |             |           |               |                                  |                          |        | retirement       |           |       |  |
| 24 |             |           |               |                                  |                          |        | community        |           |       |  |
| 25 |             |           |               |                                  |                          |        |                  |           |       |  |
| 26 | Zingmond    | USA       | retrospective | n/a                              | n/a                      | 21,310 | community-       | ≥75       | 78.0  |  |
| 27 | et al.      |           | cohort study  |                                  |                          |        | dwelling         |           |       |  |
| 28 | (2011)      |           |               |                                  |                          |        |                  |           |       |  |
| 29 |             |           |               |                                  |                          |        |                  |           |       |  |

Note. n/a = not applicable, N/A = not available

## Preferred Reporting Items for Systematic reviews and Meta-Analyses extension for Scoping Reviews (PRISMA-ScR) Checklist

| SECTION                                               | ITEM | PRISMA-ScR CHECKLIST ITEM                                                                                                                                                                                                                                                                                  | REPORTED ON PAGE # |
|-------------------------------------------------------|------|------------------------------------------------------------------------------------------------------------------------------------------------------------------------------------------------------------------------------------------------------------------------------------------------------------|--------------------|
| <b>TITLE</b>                                          |      |                                                                                                                                                                                                                                                                                                            |                    |
| Title                                                 | 1    | Identify the report as a scoping review.                                                                                                                                                                                                                                                                   | p.2                |
| <b>ABSTRACT</b>                                       |      |                                                                                                                                                                                                                                                                                                            |                    |
| Structured summary                                    | 2    | Provide a structured summary that includes (as applicable): background, objectives, eligibility criteria, sources of evidence, charting methods, results, and conclusions that relate to the review questions and objectives.                                                                              | p.3                |
| <b>INTRODUCTION</b>                                   |      |                                                                                                                                                                                                                                                                                                            |                    |
| Rationale                                             | 3    | Describe the rationale for the review in the context of what is already known. Explain why the review questions/objectives lend themselves to a scoping review approach.                                                                                                                                   | p.4-6              |
| Objectives                                            | 4    | Provide an explicit statement of the questions and objectives being addressed with reference to their key elements (e.g., population or participants, concepts, and context) or other relevant key elements used to conceptualize the review questions and/or objectives.                                  | p.5, l.59-p.6, l.5 |
| <b>METHODS</b>                                        |      |                                                                                                                                                                                                                                                                                                            |                    |
| Protocol and registration                             | 5    | Indicate whether a review protocol exists; state if and where it can be accessed (e.g., a Web address); and if available, provide registration information, including the registration number.                                                                                                             | p.6, l.22-24       |
| Eligibility criteria                                  | 6    | Specify characteristics of the sources of evidence used as eligibility criteria (e.g., years considered, language, and publication status), and provide a rationale.                                                                                                                                       | p.6-7              |
| Information sources*                                  | 7    | Describe all information sources in the search (e.g., databases with dates of coverage and contact with authors to identify additional sources), as well as the date the most recent search was executed.                                                                                                  | p.7, l.44          |
| Search                                                | 8    | Present the full electronic search strategy for at least 1 database, including any limits used, such that it could be repeated.                                                                                                                                                                            | Appendix A         |
| Selection of sources of evidence†                     | 9    | State the process for selecting sources of evidence (i.e., screening and eligibility) included in the scoping review.                                                                                                                                                                                      | p.8                |
| Data charting process‡                                | 10   | Describe the methods of charting data from the included sources of evidence (e.g., calibrated forms or forms that have been tested by the team before their use, and whether data charting was done independently or in duplicate) and any processes for obtaining and confirming data from investigators. | p.8-9              |
| Data items                                            | 11   | List and define all variables for which data were sought and any assumptions and simplifications made.                                                                                                                                                                                                     | p.8, l.53-p.9, l.5 |
| Critical appraisal of individual sources of evidence§ | 12   | If done, provide a rationale for conducting a critical appraisal of included sources of evidence; describe the methods used and how this information was used in any data synthesis (if appropriate).                                                                                                      | p.8                |



| SECTION                                       | ITEM | PRISMA-ScR CHECKLIST ITEM                                                                                                                                                                       | REPORTED ON PAGE # |
|-----------------------------------------------|------|-------------------------------------------------------------------------------------------------------------------------------------------------------------------------------------------------|--------------------|
| Synthesis of results                          | 13   | Describe the methods of handling and summarizing the data that were charted.                                                                                                                    | p.9-10             |
| <b>RESULTS</b>                                |      |                                                                                                                                                                                                 |                    |
| Selection of sources of evidence              | 14   | Give numbers of sources of evidence screened, assessed for eligibility, and included in the review, with reasons for exclusions at each stage, ideally using a flow diagram.                    | p.10 and figure 1  |
| Characteristics of sources of evidence        | 15   | For each source of evidence, present characteristics for which data were charted and provide the citations.                                                                                     | Appendix C         |
| Critical appraisal within sources of evidence | 16   | If done, present data on critical appraisal of included sources of evidence (see item 12).                                                                                                      | n/a                |
| Results of individual sources of evidence     | 17   | For each included source of evidence, present the relevant data that were charted that relate to the review questions and objectives.                                                           | p.11-12 (table 1)  |
| Synthesis of results                          | 18   | Summarize and/or present the charting results as they relate to the review questions and objectives.                                                                                            | p.11-17            |
| <b>DISCUSSION</b>                             |      |                                                                                                                                                                                                 |                    |
| Summary of evidence                           | 19   | Summarize the main results (including an overview of concepts, themes, and types of evidence available), link to the review questions and objectives, and consider the relevance to key groups. | p.17-19 + 21       |
| Limitations                                   | 20   | Discuss the limitations of the scoping review process.                                                                                                                                          | p.18-19            |
| Conclusions                                   | 21   | Provide a general interpretation of the results with respect to the review questions and objectives, as well as potential implications and/or next steps.                                       | p.21               |
| <b>FUNDING</b>                                |      |                                                                                                                                                                                                 |                    |
| Funding                                       | 22   | Describe sources of funding for the included sources of evidence, as well as sources of funding for the scoping review. Describe the role of the funders of the scoping review.                 | p.22               |

JBI = Joanna Briggs Institute; PRISMA-ScR = Preferred Reporting Items for Systematic reviews and Meta-Analyses extension for Scoping Reviews.

\* Where *sources of evidence* (see second footnote) are compiled from, such as bibliographic databases, social media platforms, and Web sites.

† A more inclusive/heterogeneous term used to account for the different types of evidence or data sources (e.g., quantitative and/or qualitative research, expert opinion, and policy documents) that may be eligible in a scoping review as opposed to only studies. This is not to be confused with *information sources* (see first footnote).

‡ The frameworks by Arksey and O'Malley (6) and Levac and colleagues (7) and the JBI guidance (4, 5) refer to the process of data extraction in a scoping review as data charting.

§ The process of systematically examining research evidence to assess its validity, results, and relevance before using it to inform a decision. This term is used for items 12 and 19 instead of "risk of bias" (which is more applicable to systematic reviews of interventions) to include and acknowledge the various sources of evidence that may be used in a scoping review (e.g., quantitative and/or qualitative research, expert opinion, and policy document).

From: Tricco AC, Lillie E, Zarin W, O'Brien KK, Colquhoun H, Levac D, et al. PRISMA Extension for Scoping Reviews (PRISMA-ScR): Checklist and Explanation. *Ann Intern Med.* 2018;169:467–473. doi: 10.7326/M18-0850.

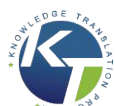

St. Michael's

Inspired Care.  
Inspiring Science.

For peer review only - <http://bmjopen.bmj.com/site/about/guidelines.xhtml>
