# Supplementary material for: Laying the foundation for a Core Set of the International Classification of Functioning, Disability and Health for community-dwelling older adults in primary care: relevant categories of their functioning from the research perspective, a scoping review
Source: PubMed Central journal article supplement — BMJ Open. 2021 Feb 17;11(2):e037333. doi: 10.1136/bmjopen-2020-037333 (PMC7893647; doi:10.1136/bmjopen-2020-037333), 2021-02-17
Supplement: bmjopen-2020-037333supp001.pdf [file bmjopen-2020-037333supp001.pdf]

## Appendix A

### Search strategy Embase

1. aged/
2. very elderly/
3. aging/
4. "elder\*".ab,ti.
5. "senior\*".ab,ti.
6. "geriatric\*".ab,ti.
7. aging.ab,ti.
8. ageing.ab,ti.
9. "geriatric assessment"/
10. "limited mobility"/
11. "Sickness Impact Profile"/
12. "risk factor"/
13. "independent living"/
14. health/
15. "mental health"/
16. "quality of life"/
17. "women's health"/
18. "men's health"/
19. "health status"/
20. "International Classification of Functioning, Disability and Health"/
21. "community living"/
22. "coping behavior"/
23. disability/
24. "environmental factor"/
25. performance/
26. "physical disability"/
27. "ADL disability"/

28. "psychologic assessment"/
29. "self care"/
30. "social environment"/
31. "social interaction"/
32. "social life"/
33. "social problem"/
34. "wellbeing"/
35. "abilit\*".ab,ti.
36. mobility.ab,ti.
37. "daily routine".ab,ti.
38. "social life".ab,ti.
39. performance.ab,ti.
40. self-care.ab,ti.
41. selfcare.ab,ti.
42. "social interaction".ab,ti.
43. "interpersonal interaction".ab,ti.
44. "coping strategy".ab,ti.
45. "coping strategies".ab,ti.
46. communitydwelling.ab,ti.
47. "community dwelling".ab,ti.
48. "independent living".ab,ti.
49. "independently living".ab,ti.
50. "contextual factor\*".ab,ti.
51. "protective factor\*".ab,ti.
52. "risk factor\*".ab,ti.
53. "personal factor\*".ab,ti.
54. "environmental factor\*".ab,ti.
55. "living alone".ab,ti.
56. "sociocultural factor\*".ab,ti.

57. "psychosocial factor\*".ab,ti.
58. "social environment".ab,ti.
59. "quality of life".ab,ti.
60. well-being.ab,ti.
61. wellbeing.ab,ti.
62. wellness.ab,ti.
63. ICF.ab,ti.
64. "International Classification of Functioning".ab,ti.
65. health.ab,ti.
66. "medical problem\*".ab,ti.
67. "psychological problem\*".ab,ti.
68. "social problem\*".ab,ti.
69. "physical change\*".ab,ti.
70. "physical illness".ab,ti.
71. "psychological change\*".ab,ti.
72. impairment.ab,ti.
73. "mental change\*".ab,ti.
74. "psychological assessment".ab,ti.
75. "cognitive assessment".ab,ti.
76. "needs assessment".ab,ti.
77. "neuropsychological assessment".ab,ti.
78. "behavioural assessment".ab,ti.
79. "behavioral assessment".ab,ti.
80. "social participation".ab,ti.
81. "activities of daily living".ab,ti.
82. "daily living activities".ab,ti.
83. "body function".ab,ti.
84. "body functions".ab,ti.
85. "body structures".ab,ti.

86. "body structure".ab,ti.
87. "social participation"/
88. "daily life activity"/
89. 80 or 81 or 82 or 83 or 84 or 85 or 86 or 87 or 88
90. (English or German).lg.
91. article.pt.
92. ("2007" or "2008" or "2009" or "2010" or "2011" or "2012" or "2013" or "2014" or "2015" or "2016" or "2017").yr.
93. "home environment".ab,ti.
94. "urban environment".ab,ti.
95. disability.ab,ti.
96. disabilities.ab,ti.
97. disable.ab,ti.
98. disabled.ab,ti.
99. disablement.ab,ti.
100. function.ab,ti.
101. functions.ab,ti.
102. functioning.ab,ti.
103. functional.ab,ti.
104. 1 or 2 or 3 or 4 or 5 or 6 or 7 or 8
105. 13 or 46 or 47 or 48 or 49 or 93 or 94
106. 9 or 10 or 11 or 12 or 14 or 15 or 16 or 17 or 18 or 19 or 20 or 21 or 22 or 23 or 24 or 25 or 26 or 27 or 28 or 29 or 30 or 31 or 32 or 33 or 34 or 35 or 36 or 37 or 38 or 39 or 40 or 41 or 42 or 43 or 44 or 45 or 50 or 51 or 52 or 53 or 54 or 55 or 56 or 57 or 58 or 59 or 60 or 61 or 62 or 63 or 64 or 65 or 66 or 67 or 68 or 69 or 70 or 71 or 72 or 73 or 74 or 75 or 76 or 77 or 78 or 79 or 95 or 96 or 97 or 98 or 99 or 100 or 101 or 102 or 103
107. 89 and 104 and 105 and 106
108. 90 and 92 and 107
