# Supplementary material for: Laying the foundation for a Core Set of the International Classification of Functioning, Disability and Health for community-dwelling older adults in primary care: relevant categories of their functioning from the research perspective, a scoping review
Source: PubMed Central journal article supplement — BMJ Open. 2021 Feb 17;11(2):e037333. doi: 10.1136/bmjopen-2020-037333 (PMC7893647; doi:10.1136/bmjopen-2020-037333), 2021-02-17
Supplement: bmjopen-2020-037333supp003.pdf [file bmjopen-2020-037333supp003.pdf]

**Appendix C**  
**Characteristics of included studies**

| Study                    | Methods |                                                        |                                                                                |                                                            | Demographics   |                    |        |               |
|--------------------------|---------|--------------------------------------------------------|--------------------------------------------------------------------------------|------------------------------------------------------------|----------------|--------------------|--------|---------------|
|                          | Country | Design                                                 | Type of intervention<br>(if applicable)                                        | Type of control<br>(if applicable)                         | Sample<br>size | Type of<br>sample  | Age    | Female<br>(%) |
| Aartolahti et al. (2013) | Finland | cross-sectional study                                  | multidisciplinary intervention, focused on medication, nutrition, and exercise | n/a                                                        | 576            | community-dwelling | 76-100 | 70.0          |
| Abellan et al. (2013)    | France  | cross-sectional study                                  | n/a                                                                            | n/a                                                        | 3,025          | community-dwelling | ≥75    | 100.0         |
| Ahluwalia et al. (2010)  | USA     | qualitative study using interviews and grounded theory | n/a                                                                            | n/a                                                        | 23             | community-dwelling | ≥78    | 61.0          |
| Behm et al. (2015)       | Sweden  | RCT with follow-up after 1 and 2 years                 | preventive home visit group, senior meeting group                              | access to the ordinary range of services for older persons | 459            | community-dwelling | 80-97  | 64.0          |
| Berkemeyer et al. (2009) | Germany | cross-sectional study                                  | n/a                                                                            | n/a                                                        | 440            | community-dwelling | ≥75    | 44.8          |
| Blain et al. (2010)      | France  | longitudinal study                                     | n/a                                                                            | n/a                                                        | 1300           | community-dwelling | ≥75    | 100.0         |
| Bollwein et al. (2013)   | Germany | cross-sectional study                                  | n/a                                                                            | n/a                                                        | 192            | community-dwelling | 75-96  | 64.6          |
| Brown et al. (2016)      | USA     | longitudinal cohort study                              | n/a                                                                            | n/a                                                        | 410            | community-dwelling | ≥75    | 57.0          |

|                            |           |                                                                         |                                                                                                                                                                                  |                                                                           |     |                    |       |       |
|----------------------------|-----------|-------------------------------------------------------------------------|----------------------------------------------------------------------------------------------------------------------------------------------------------------------------------|---------------------------------------------------------------------------|-----|--------------------|-------|-------|
| Byles et al. (2015)        | Australia | cross-sectional study                                                   | n/a                                                                                                                                                                              | n/a                                                                       | 260 | community-dwelling | 75-80 | 50.4  |
| Calvert et al. (2009)      | USA       | cross-sectional study                                                   | n/a                                                                                                                                                                              | n/a                                                                       | 306 | community-dwelling | ≥85   | 62.0  |
| Chipperfield et al. (2008) | Canada    | prospective cohort study                                                | n/a                                                                                                                                                                              | n/a                                                                       | 198 | community-dwelling | 80-98 | 63.1  |
| Diez-Ruiz et al. (2016)    | Spain     | prospective cohort study with 2 years follow-up                         | n/a                                                                                                                                                                              | n/a                                                                       | 215 | community dwelling | ≥75   | 63.0  |
| Eckerblad et al. (2015)    | Sweden    | qualitative study using semi-structured interviews and content analysis | n/a                                                                                                                                                                              | n/a                                                                       | 20  | community-dwelling | 79-89 | 80.0  |
| El-Khoury et al. (2015)    | France    | RCT                                                                     | 2-year exercise programme of progressive balance retraining in reducing injurious falls, weekly supervised group sessions supplemented by individually prescribed home exercises | brochures about fall prevention, newsletters, four free exercise sessions | 706 | community-dwelling | 75-85 | 100.0 |
| Eronen et al. (2016)       | Finland   | cross-sectional study                                                   | n/a                                                                                                                                                                              | n/a                                                                       | 848 | community-dwelling | 75-90 | 62.0  |
| Fabre et al. (2007)        | USA       | population-based cohort study                                           | n/a                                                                                                                                                                              | n/a                                                                       | 74  | community-dwelling | ≥90   | 51.3  |

|                           |         |                                                           |                                                   |                                                                                    |       |                    |       |       |
|---------------------------|---------|-----------------------------------------------------------|---------------------------------------------------|------------------------------------------------------------------------------------|-------|--------------------|-------|-------|
| Formiga et al. (2014)     | Spain   | longitudinal study                                        | n/a                                               | n/a                                                                                | 167   | community-dwelling | ≥85   | 60.5  |
| Formiga et al. (2016)     | Spain   | RCT with 5-year follow-up                                 | falls and malnutrition prevention                 | general primary care assessment                                                    | 328   | community-dwelling | ≥85   | 61.6  |
| Fritel et al. (2013)      | France  | observational cross-sectional study                       | n/a                                               | n/a                                                                                | 1,942 | community-dwelling | 75-85 | 100.0 |
| Gustafsson et al. (2013)  | Sweden  | RCT                                                       | preventive home visit group, senior meeting group | ordinary range of community services offered by the municipal care for the aged    | 459   | community-dwelling | 80-97 | 64.0  |
| Gustafsson et al. (2012)  | Sweden  | RCT                                                       | preventive home visit group, senior meeting group | access to the ordinary range of community services offered by the municipal agency | 459   | community-dwelling | 80-97 | 64.0  |
| Hammar et al. (2014)      | Sweden  | qualitative study using interviews and grounded theory    | n/a                                               | n/a                                                                                | 11    | community-dwelling | 84-95 | 54.5  |
| Hegendörfer et al. (2017) | Belgium | prospective, observational, population based cohort study | n/a                                               | n/a                                                                                | 501   | community-dwelling | ≥80   | 63.0  |
| Heyl & Wahl (2010)        | Germany | cross-sectional study                                     | n/a                                               | n/a                                                                                | 271   | community-dwelling | 75-94 | 54    |

|                        |                         |                                                                         |     |     |                                   |                    |        |       |
|------------------------|-------------------------|-------------------------------------------------------------------------|-----|-----|-----------------------------------|--------------------|--------|-------|
| Hoeksema et al. (2017) | Netherlands             | cross-sectional study                                                   | n/a | n/a | 1026                              | community-dwelling | ≥75    | 59.0  |
| Horgen et al. (2012)   | Norway                  | mixed methods study                                                     | n/a | n/a | 165                               | community-dwelling | 75     | n/a   |
| Houston et al. (2011)  | USA                     | secondary analysis of a longitudinal study with 3 years of follow-up    | n/a | n/a | 988                               | community-dwelling | 77-100 | 64.5  |
| Idland et al. (2013)   | Norway                  | prospective, observational cohort study with 9 years follow-up          | n/a | n/a | 307 (baseline)<br>113 (follow-up) | community-dwelling | 75-92  | 100.0 |
| Iwarsson et al. (2009) | Sweden, Germany, Latvia | secondary analysis of a longitudinal survey study with 1 year follow-up | n/a | n/a | 834                               | community-dwelling | 75-89  | 79.7  |
| Landi et al. (2010a)   | Italy                   | secondary analysis of a prospective cohort study (baseline)             | n/a | n/a | 357                               | community-dwelling | ≥80    | 67.0  |
| Landi et al. (2010b)   | Italy                   | secondary analysis of a prospective cohort study                        | n/a | n/a | 364 (baseline)<br>205 (follow-up) | community-dwelling | ≥80    | 67.0  |

|                        |                  |                                                                   |     |     |     |                    |       |      |
|------------------------|------------------|-------------------------------------------------------------------|-----|-----|-----|--------------------|-------|------|
| Laudisio et al. (2013) | Italy            | with 2 years follow-up<br>cross-sectional study                   | n/a | n/a | 356 | community-dwelling | ≥75   | 54.5 |
| Laudisio et al. (2015) | Italy            | longitudinal, population-based study with 1-year follow-up        | n/a | n/a | 342 | community-dwelling | ≥75   | 56.0 |
| Laudisio et al. (2010) | Italy            | cross-sectional study                                             | n/a | n/a | 350 | community-dwelling | ≥75   | 54.3 |
| Lofqvist et al. (2017) | Latvia           | secondary analysis of a longitudinal study with 9 years follow-up | n/a | n/a | 59  | community-dwelling | 77-90 | 90.0 |
| Mangani et al. (2008)  | Italy            | secondary analysis of a prospective cohort study                  | n/a | n/a | 364 | community-dwelling | ≥80   | 67.0 |
| Mänty et al. (2014)    | Denmark, Finland | secondary analysis of a longitudinal study                        | n/a | n/a | 561 | community-dwelling | 75    | 55.0 |
| Mikkola et al. (2016)  | Finland          | secondary analysis of a cross sectional and                       | n/a | n/a | 766 | community-dwelling | 75-90 | 62.7 |

|                         |         |                                                                           |     |     |       |                    |        |      |  |
|-------------------------|---------|---------------------------------------------------------------------------|-----|-----|-------|--------------------|--------|------|--|
|                         |         | longitudinal study                                                        |     |     |       |                    |        |      |  |
| Mikkola et al. (2015)   | Finland | cross-sectional study                                                     | n/a | n/a | 848   | community-dwelling | 75-90  | 62.0 |  |
| Murabito et al. (2008)  | USA     | secondary analysis of a prospective cohort study                          | n/a | n/a | 830   | community-dwelling | 79-88  | 61.4 |  |
| Muscari et al. (2017)   | Italy   | prospective, longitudinal population-based study with 7 years follow-up   | n/a | n/a | 500   | community-dwelling | 85-102 | 65.8 |  |
| Nitsch et al. (2011)    | UK      | cross-sectional study                                                     | n/a | n/a | 2,967 | community-dwelling | ≥75    | 59.7 |  |
| Nykänen et al. (2013)   | Finland | population based randomized comparative study                             | n/a | n/a | 696   | community-dwelling | ≥75    | 69.4 |  |
| Polku et al. (2015)     | Finland | prospective cohort study                                                  | n/a | n/a | 848   | community-dwelling | 75-90  | 62.0 |  |
| Portegijs et al. (2016) | Finland | secondary analysis of a cross-sectional study (baseline data & follow-up) | n/a | n/a | 753   | community-dwelling | 75-90  | 64.0 |  |

|                           |         |                                                                           |                     |                        |                                                                       |                                          |                         |      |
|---------------------------|---------|---------------------------------------------------------------------------|---------------------|------------------------|-----------------------------------------------------------------------|------------------------------------------|-------------------------|------|
| Quail et al. (2007)       | Canada  | secondary analysis of a population-based cohort study                     | n/a                 | n/a                    | 508                                                                   | community-dwelling                       | 75-96                   | 66.9 |
| Rantakokko et al. (2014)  | Finland | secondary analysis of a cross-sectional study (baseline data)             | n/a                 | n/a                    | 847                                                                   | community-dwelling                       | 75-90                   | 62.0 |
| Rantakokko et al. (2016)  | Finland | secondary analysis of a cross-sectional study (baseline data & follow-up) | n/a                 | n/a                    | 848 (baseline),<br>816 (1 year follow-up),<br>761 (2 years follow-up) | community-dwelling                       | 75-90                   | 62.0 |
| Rantz et al. (2015)       | USA     | secondary analysis of a cross-sectional study                             | living with sensors | living without sensors | 133                                                                   | residents of independent living facility | mean age: 83            | 64.7 |
| Rao et al. (2016)         | Canada  | secondary analysis of a cross-sectional study                             | n/a                 | n/a                    | 1,668                                                                 | community-dwelling                       | mean age: 82.9 (SD 6.9) | 58.0 |
| Rapo-Pylkko et al. (2016) | Finland | cross-sectional study                                                     | n/a                 | n/a                    | 106                                                                   | community-dwelling                       | 75-85                   | 74.0 |

|                       |             |                                                                                             |                                                                                                                                                                                                                                                                                                                                                   |                                                        |        |                    |     |      |
|-----------------------|-------------|---------------------------------------------------------------------------------------------|---------------------------------------------------------------------------------------------------------------------------------------------------------------------------------------------------------------------------------------------------------------------------------------------------------------------------------------------------|--------------------------------------------------------|--------|--------------------|-----|------|
| Rydwik et al. (2010)  | Sweden      | RCT 24 month follow-up                                                                      | 1) nutritional treatment (individual dietary counseling + 5 group sessions + general physical training advice)<br>2) physical training (regular physical group training of approx. 1h, twice a week for 12 weeks +general diet advice)<br>3) Training & nutrition (specific physical training & specific diet counseling/group session education) | general physical training advice & general diet advice | 96     | community-dwelling | ≥75 | 60.4 |
| Rydwik et al. (2008)  | Sweden      | RCT                                                                                         | 1) nutrition (diet counseling/group session education + general physical training advice)<br>2) training (specific physical training + general diet advice)<br>3) Training & nutrition (specific physical training & specific diet counseling/group session education)                                                                            | general physical training advice & general diet advice | 96     | community-dwelling | ≥75 | 60.4 |
| Sabayan et al. (2012) | Netherlands | population-based prospective follow-up study with cross-sectional and longitudinal analyses | n/a                                                                                                                                                                                                                                                                                                                                               | n/a                                                    | 572    | community-dwelling | ≥85 | 66.8 |
| Sampson et al. (2009) | UK          | prospective cohort study                                                                    | n/a                                                                                                                                                                                                                                                                                                                                               | n/a                                                    | 10,720 | community-dwelling | ≥75 | 59.6 |



|                               |                                                      |                                                                                  |                                                                                                         |                                                           |                                       |                                                                 |       |      |
|-------------------------------|------------------------------------------------------|----------------------------------------------------------------------------------|---------------------------------------------------------------------------------------------------------|-----------------------------------------------------------|---------------------------------------|-----------------------------------------------------------------|-------|------|
| Savikko et al. (2010)         | Finland                                              | cross-sectional study within an RCT                                              | psychosocial group rehabilitation intervention                                                          | not named (participants were not considered for analysis) | 117                                   | community-dwelling and residents of independent living facility | 75-92 | 74.0 |
| Sixsmith et al. (2014)        | Hungary, Latvia, United Kingdom, Germany, and Sweden | qualitative study using in-depth, semi-structured interviews and grounded theory | n/a                                                                                                     | n/a                                                       | 190                                   | community-dwelling                                              | 75-89 | 61.6 |
| Thompson et al. (2011)        | USA                                                  | cross-sectional study                                                            | n/a                                                                                                     | n/a                                                       | 27                                    | inhabitants of an independent retirement community              | 78-94 | 67.0 |
| Tsai et al. (2015)            | Finland                                              | cross-sectional study                                                            | n/a                                                                                                     | n/a                                                       | 174                                   | community-dwelling                                              | 75-90 | 64.0 |
| Tsai et al. (2013)            | Finland                                              | cross-sectional study                                                            | n/a                                                                                                     | n/a                                                       | 657                                   | community-dwelling                                              | 75-81 | 75.0 |
| van Bommel et al. (2010)      | Netherlands                                          | prospective population-based study                                               | n/a                                                                                                     | n/a                                                       | 277                                   | community-dwelling                                              | ≥85   | 72.6 |
| van Houwelingen et al. (2015) | Netherlands                                          | cluster RCT                                                                      | care plan for people with a combination of problems at the functional, somatic, mental, or social level | usual care                                                | 2,681 (baseline)<br>2,172 (follow-up) | community-dwelling                                              | ≥75   | 68.3 |

|                           |           |                            |                                                                                         |                          |        |                                                                                        |                          |       |
|---------------------------|-----------|----------------------------|-----------------------------------------------------------------------------------------|--------------------------|--------|----------------------------------------------------------------------------------------|--------------------------|-------|
| Vestergaard et al. (2008) | Denmark   | RCT                        | home-based video exercises; 26min/day; 3 times/week; 5 months; bi-weekly telephone call | bi-weekly telephone call | 53     | community-dwelling                                                                     | 75-91                    | 100.0 |
| Wang et al. (2017)        | Australia | cross-sectional study      | n/a                                                                                     | n/a                      | 81     | community-dwelling                                                                     | mean age: 83.8 (SD 3.83) | 44.4  |
| Williams et al. (2007)    | Australia | cross-sectional study      | n/a                                                                                     | n/a                      | 546    | community-dwelling                                                                     | 75-96                    | 68.0  |
| Wilson et al. (2007)      | UK        | cross-sectional study      | n/a                                                                                     | n/a                      | 242    | community-dwelling                                                                     | 80-90                    | 69.9  |
| Young (2009)              | USA       | prospective cohort study   | n/a                                                                                     | n/a                      | 298    | people living in the independent living unit of a continuing care retirement community | 75-94                    | 69.1  |
| Zingmond et al. (2011)    | USA       | retrospective cohort study | n/a                                                                                     | n/a                      | 21,310 | community-dwelling                                                                     | ≥75                      | 78.0  |

Note. n/a = not applicable, N/A = not available
